# Supplementary material for: The Effect of Conjugation of Ciprofloxacin and Moxifloxacin with Fatty Acids on Their Antibacterial and Anticancer Activity
Source: MDPI journal article supplement (doi:10.3390/ijms23116261), 2022-06-02
Supplement: s1 [file s1]

**The effect of conjugation of ciprofloxacin and moxifloxacin with fatty acids on their antibacterial and anticancer activity**

Alicja Chrzanowska<sup>1</sup>, Marta Struga<sup>1</sup>, Piotr Roszkowski<sup>2,\*</sup>, Michał Koliński<sup>3</sup>, Sebastian Kmiecik<sup>4</sup>, Karolina Jałbrzykowska<sup>1</sup>, Anna Zabost<sup>5</sup>, Joanna Stefańska<sup>6</sup>, Ewa Augustynowicz-Kopeć<sup>5</sup>, Małgorzata Wrzosek<sup>7</sup>, Anna Bielenica<sup>1,\*</sup>

<sup>1</sup> Chair and Department of Biochemistry, Medical University of Warsaw, ul. Banacha 1, 02-097 Warsaw, Poland; achrzanowska@wum.edu.pl (A.Ch); mstruga@wum.edu.pl (M.S), kjalbrzykowska@wum.edu.pl (K.J.), abielenica@wum.edu.pl (A.B)

<sup>2</sup> Faculty of Chemistry, University of Warsaw, Pasteura 1, 02-093 Warszawa, Poland: roszkowski@chem.uw.edu.pl (P.R)

<sup>3</sup> Bioinformatics Laboratory, Mossakowski Medical Research Institute, Polish Academy of Sciences, 5 Pawinskiego St., 02-106 Warsaw, Poland; kolinski.michal@gmail.com (M.K.)

<sup>4</sup> Biological and chemical Research Centre, Faculty of Chemistry, University of Warsaw, 02-089 Warsaw, Poland; sebastian.kmiecik@gmail.com (S.K.)

<sup>5</sup> Department of Microbiology, National Tuberculosis and Lung Diseases Research Institute, 01-138 Warsaw, Poland, e.kopec@igichp.edu.pl (E.A-K), a.zabost@igichp.edu.pl (A.Z)

<sup>6</sup> Department of Pharmaceutical Microbiology, Centre for Preclinical Research, Medical University of Warsaw, 02-097 Warszawa, Poland; jstefanska@wum.edu.pl (J.S.)

<sup>7</sup> Department of Biochemistry and Pharmacogenomics, Faculty of Pharmacy, Medical University of Warsaw, 02-097 Warsaw, Poland: mwrzosek@wum.edu.pl (M.W)

\*Corresponding authors: Anna Bielenica; abielenica@wum.edu.pl (biological activity), Piotr Roszkowski; roszkowski@chem.uw.edu.pl (chemistry)

Below  $^1\text{H}$  and  $^{13}\text{C}$  NMR spectra of synthesized amides of MXF are presented.

The NMR analysis shown that studied derivatives of MXF and fatty acids existed in solution as a rotamers mixture. Therefore, in description of NMR spectra the major form was marked as a  $R_A$  and minor form was marked as  $R_B$ . In  $\text{CDCl}_3$  the ratio of  $R_A:R_B$  is about 2:1 and in a case when the signals in NMR spectra were appropriate separated remarks were added to description. Interestingly, the propagation of rotamers depended on solvent used in NMR analysis and in case of  $\text{DMSO-d}_6$  the ratio of  $R_A:R_B$  is about 1:1.

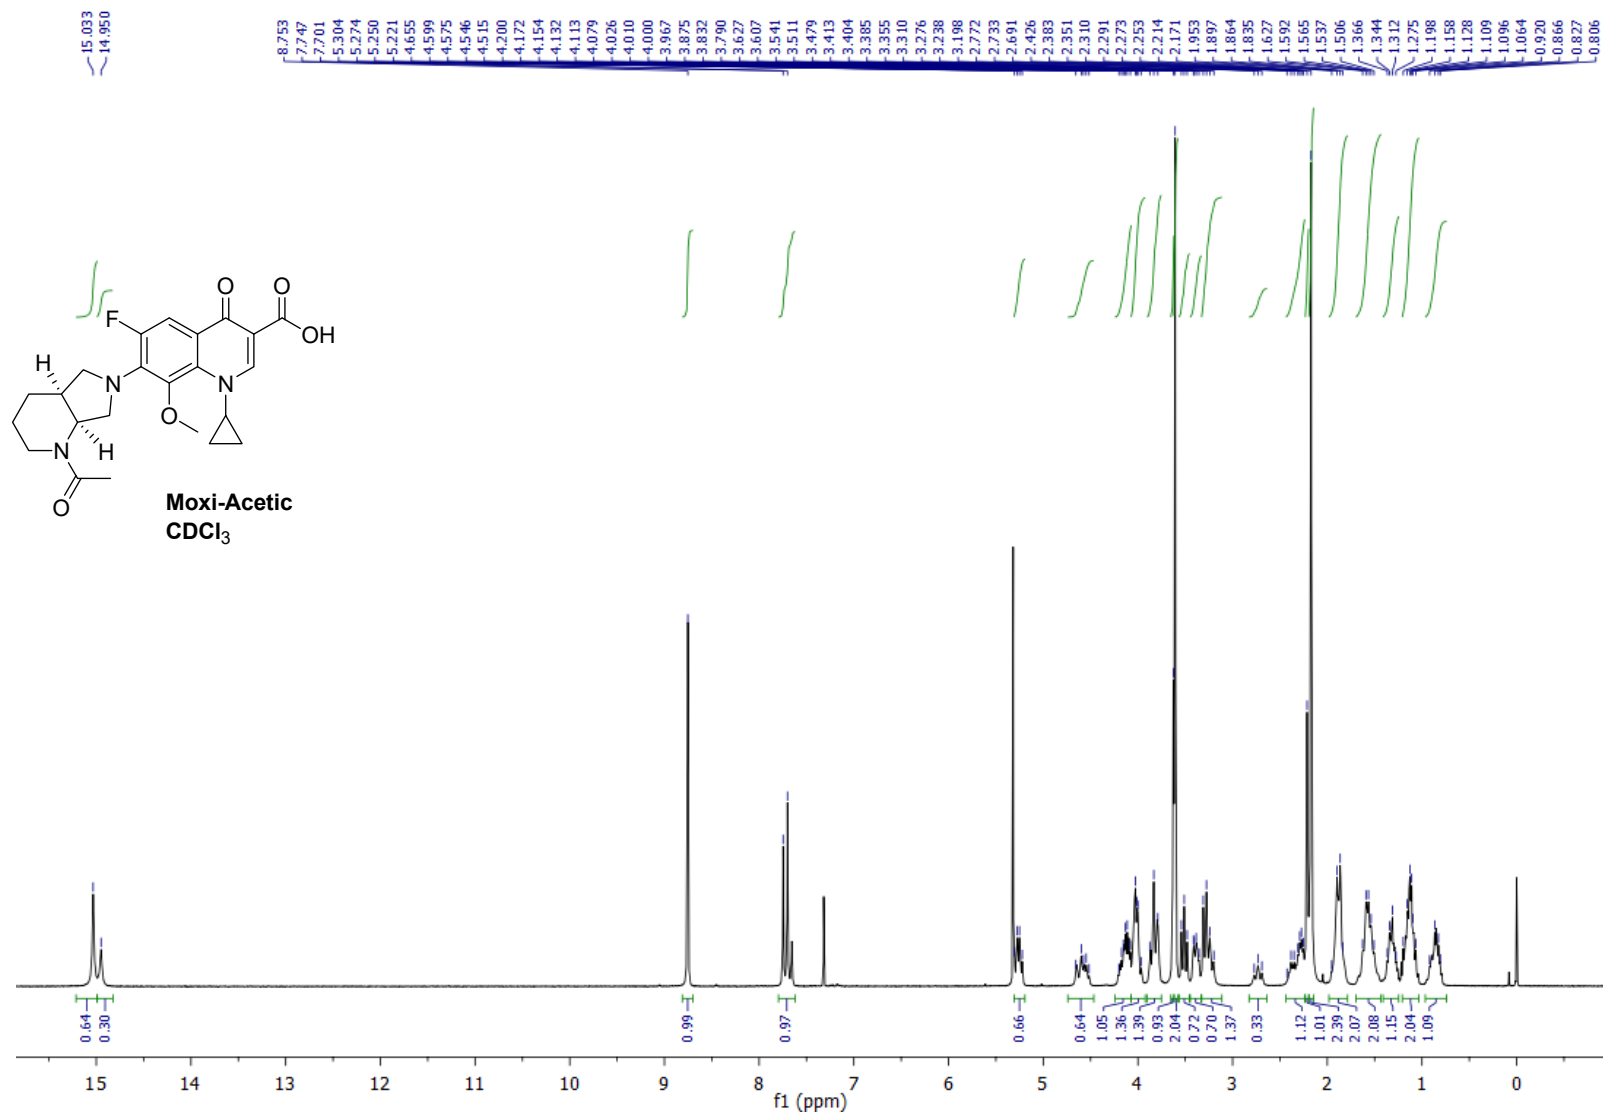

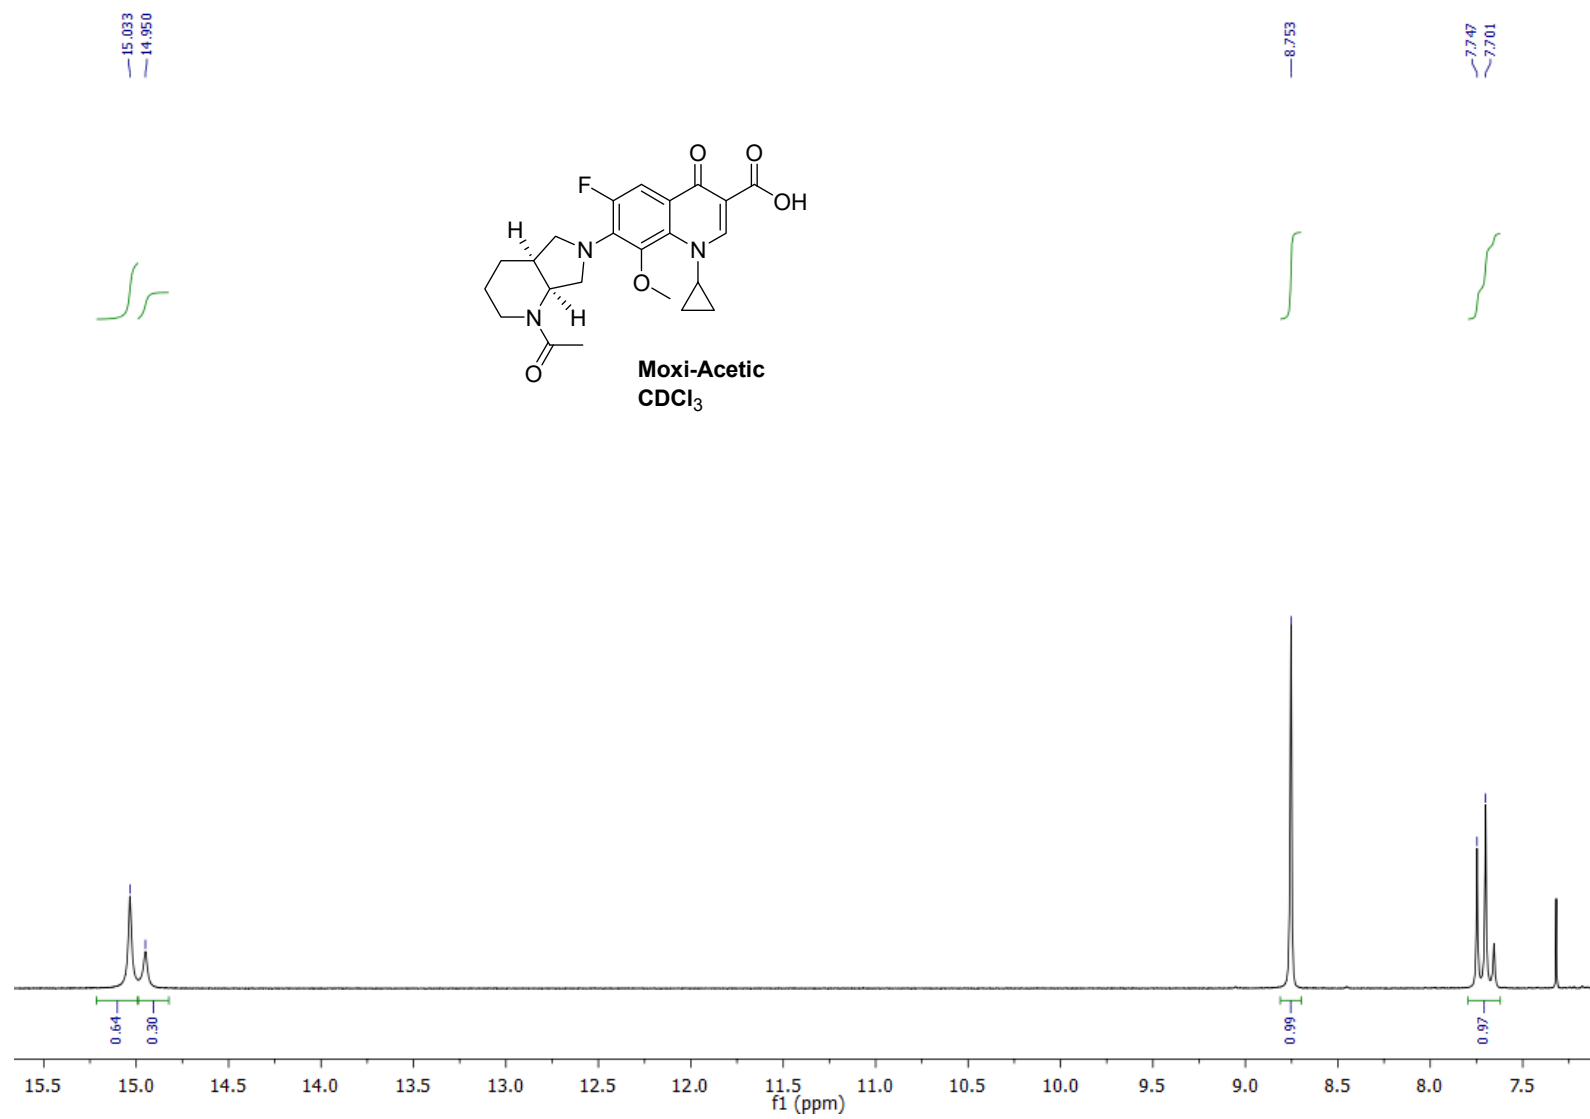

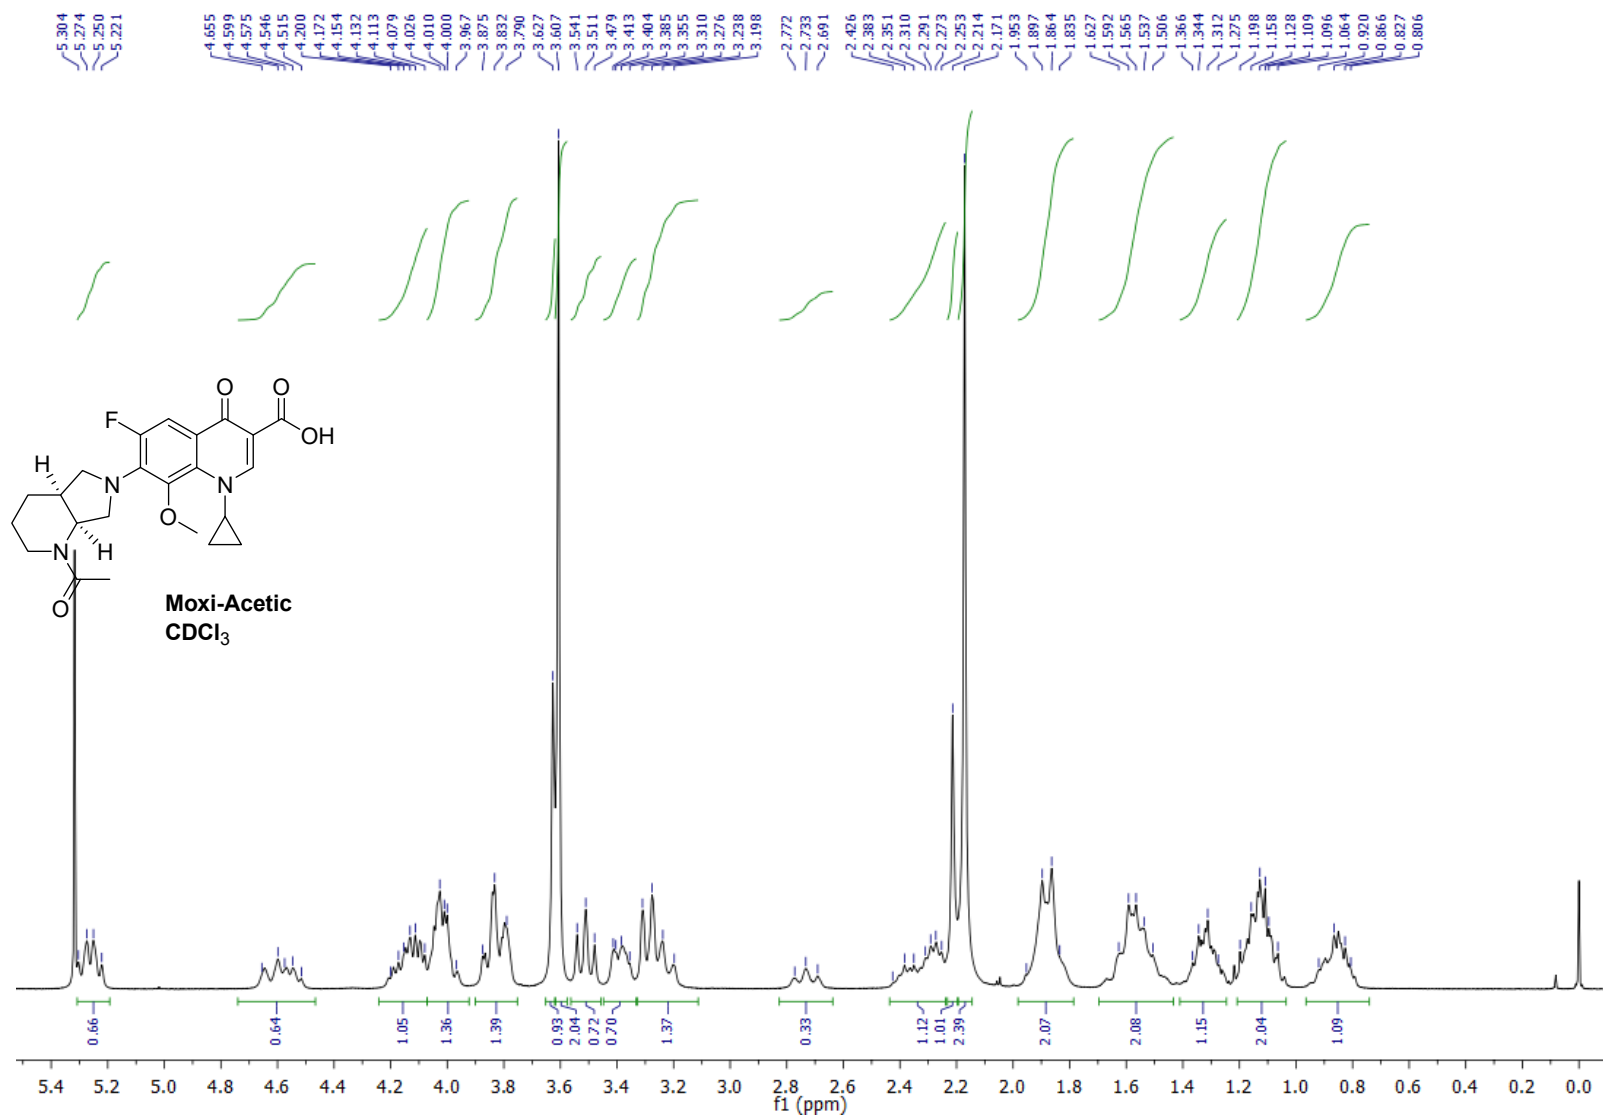

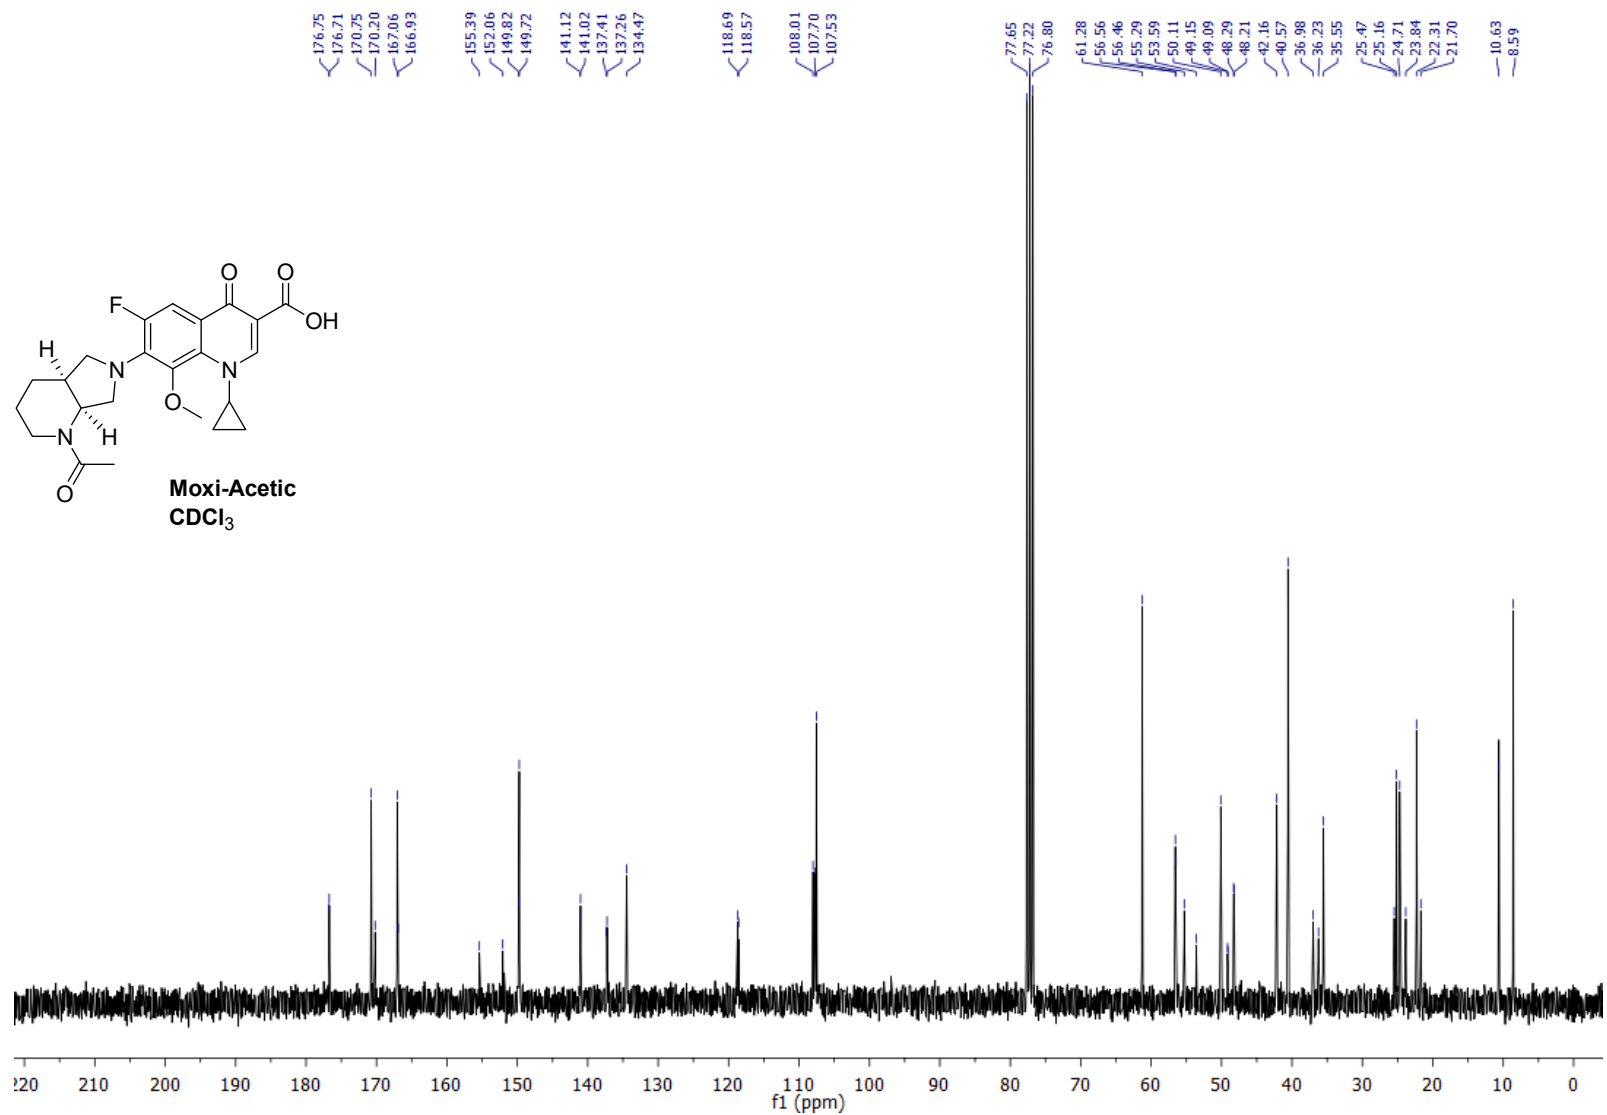

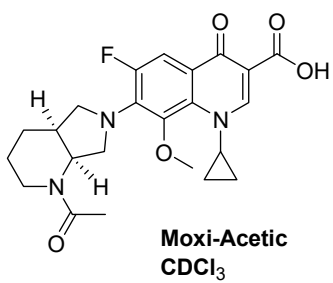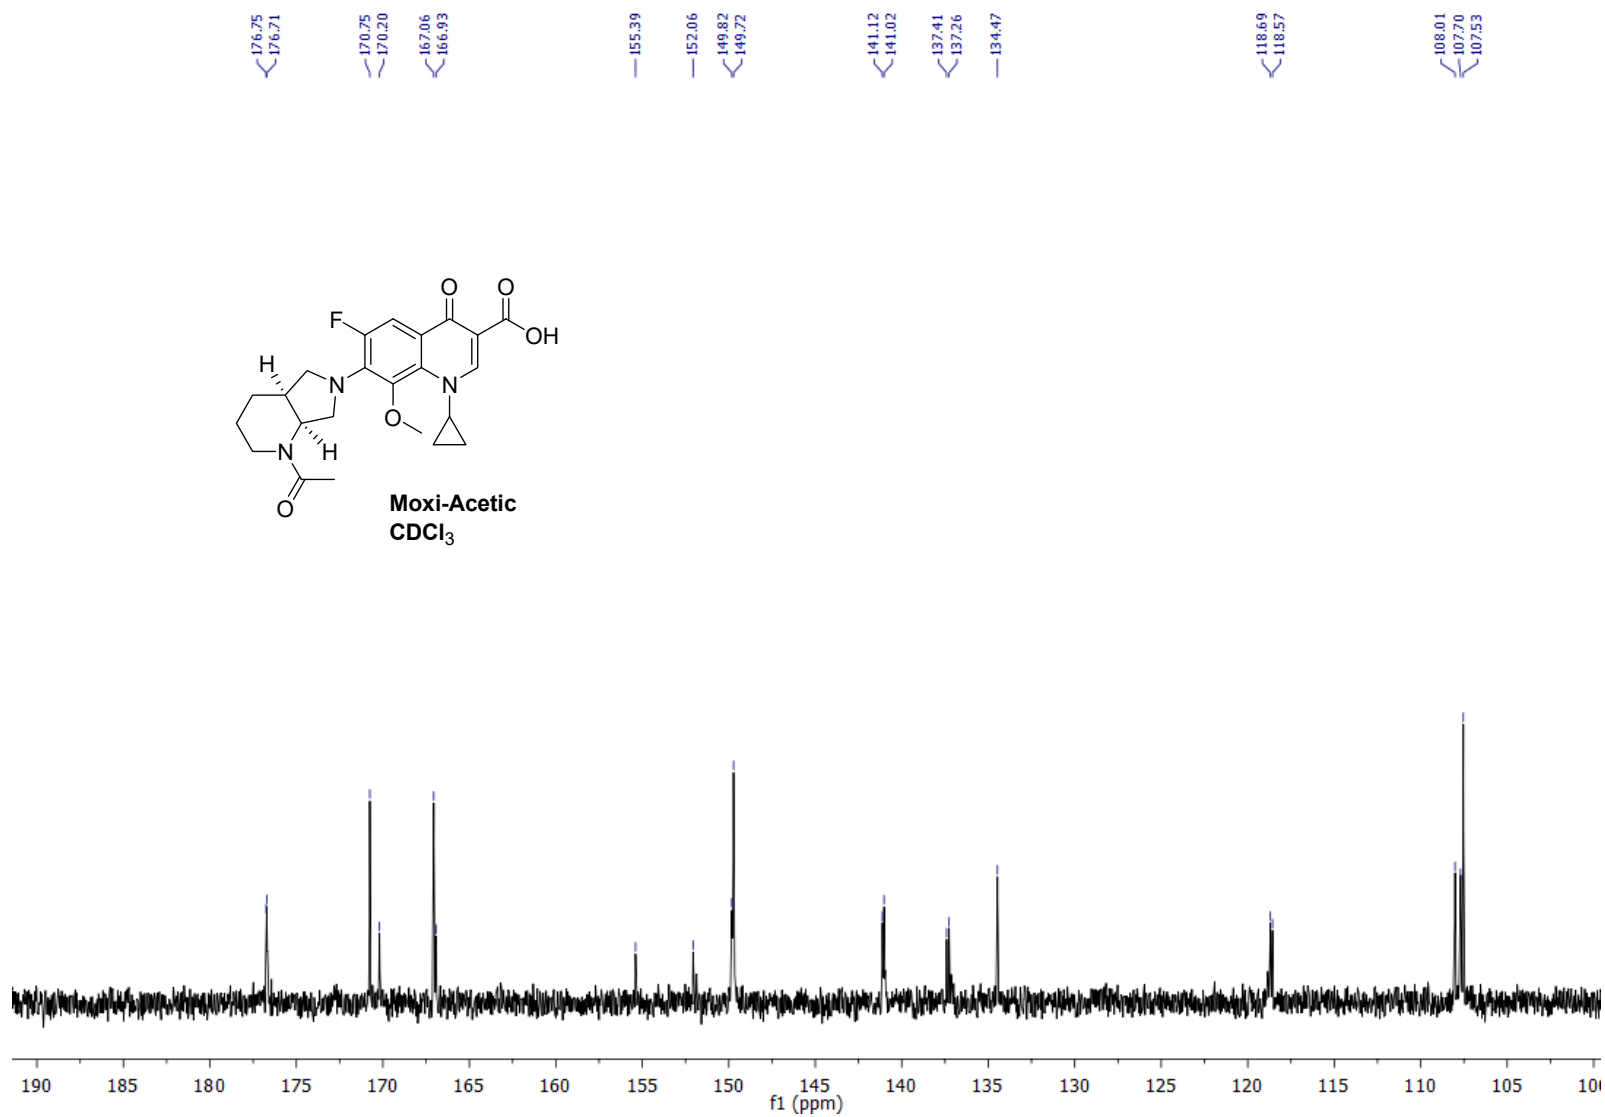

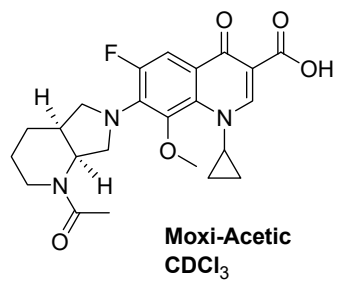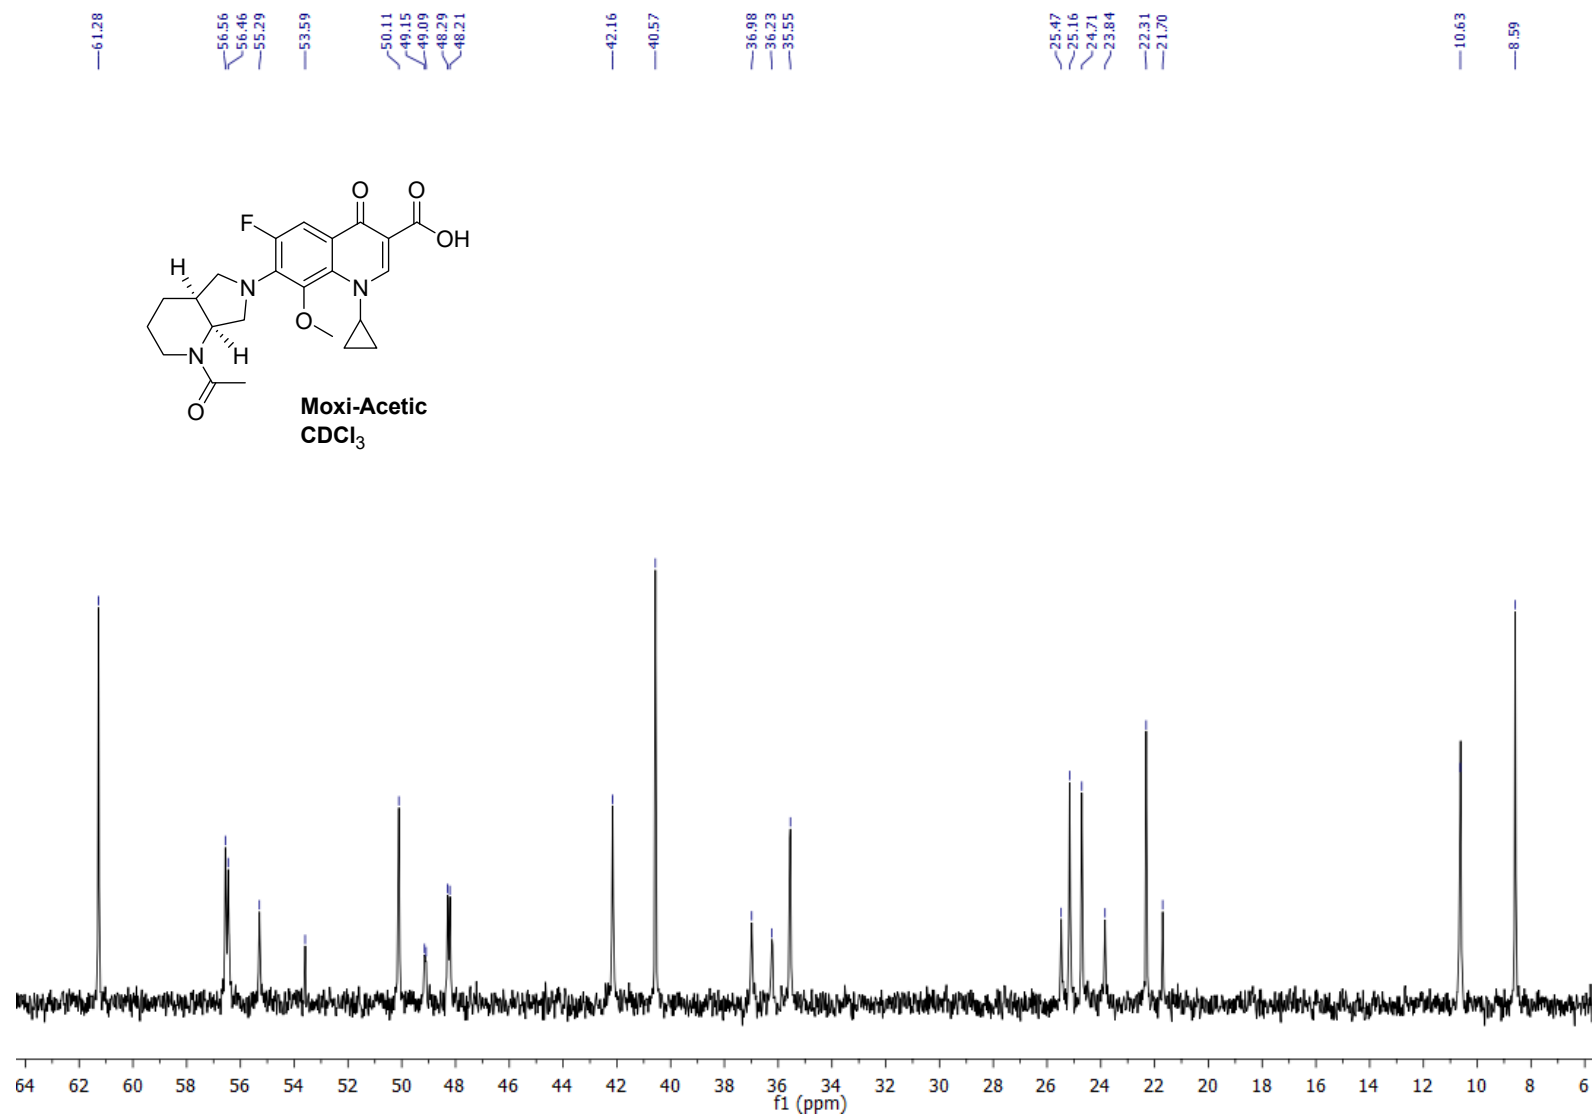



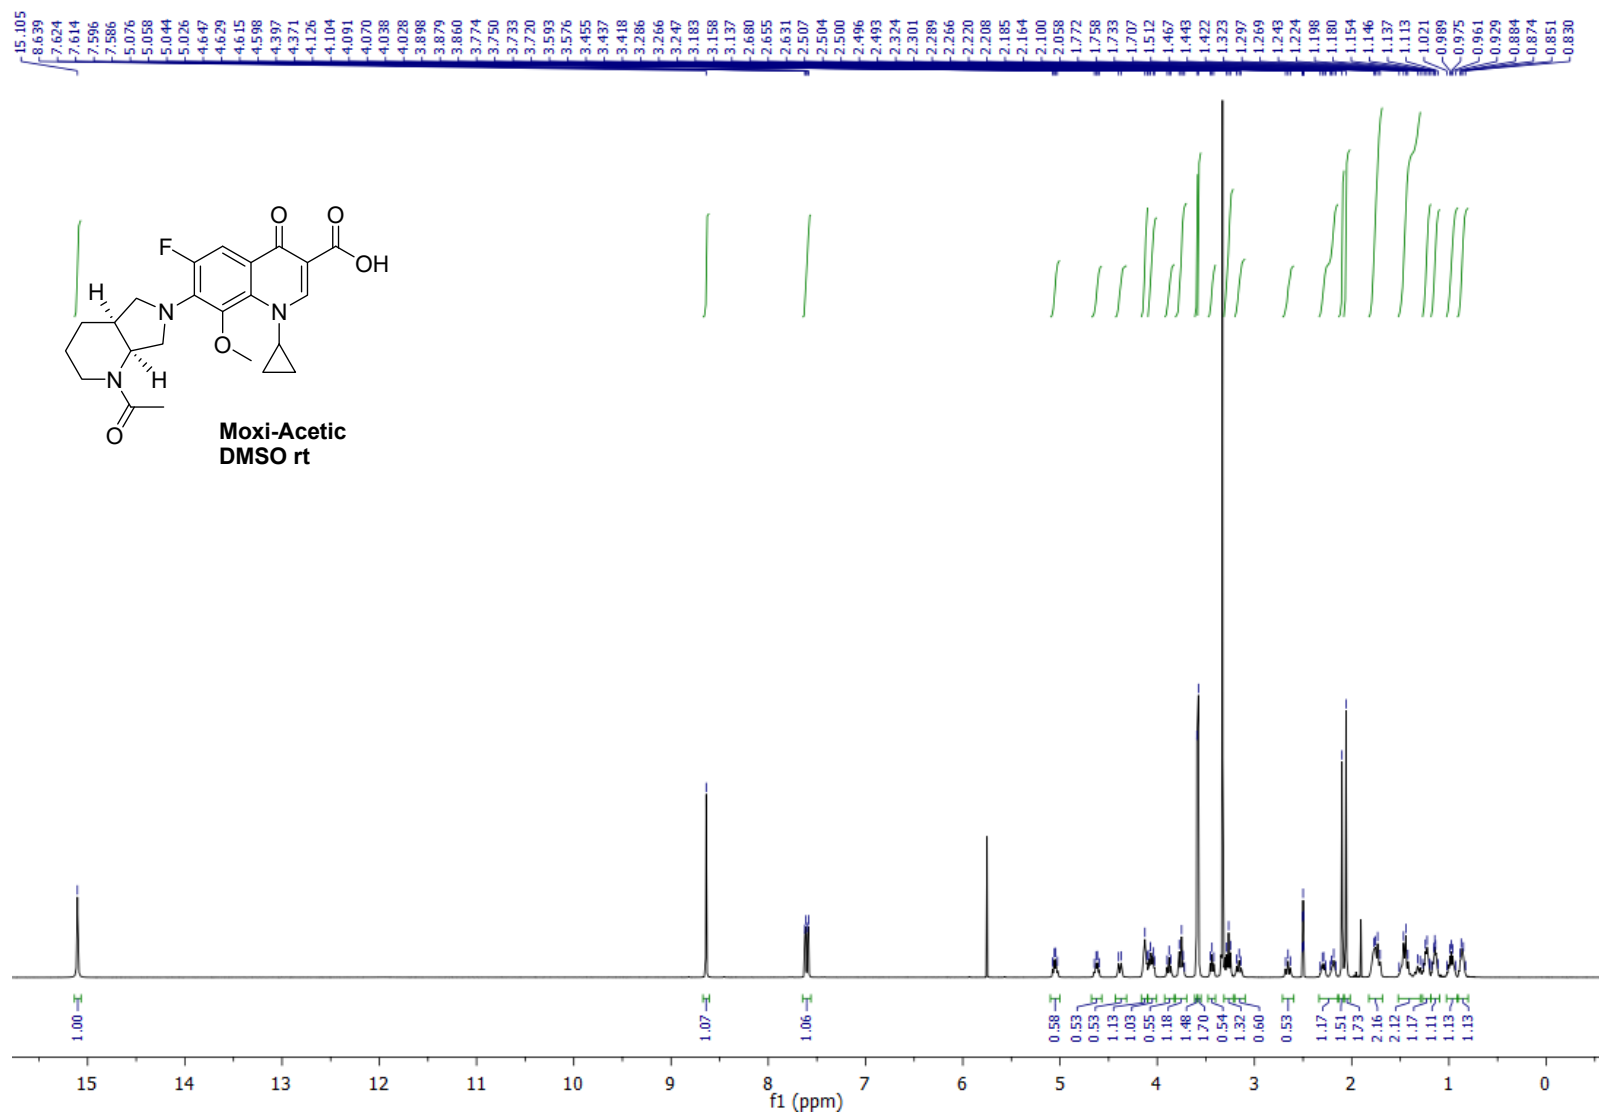

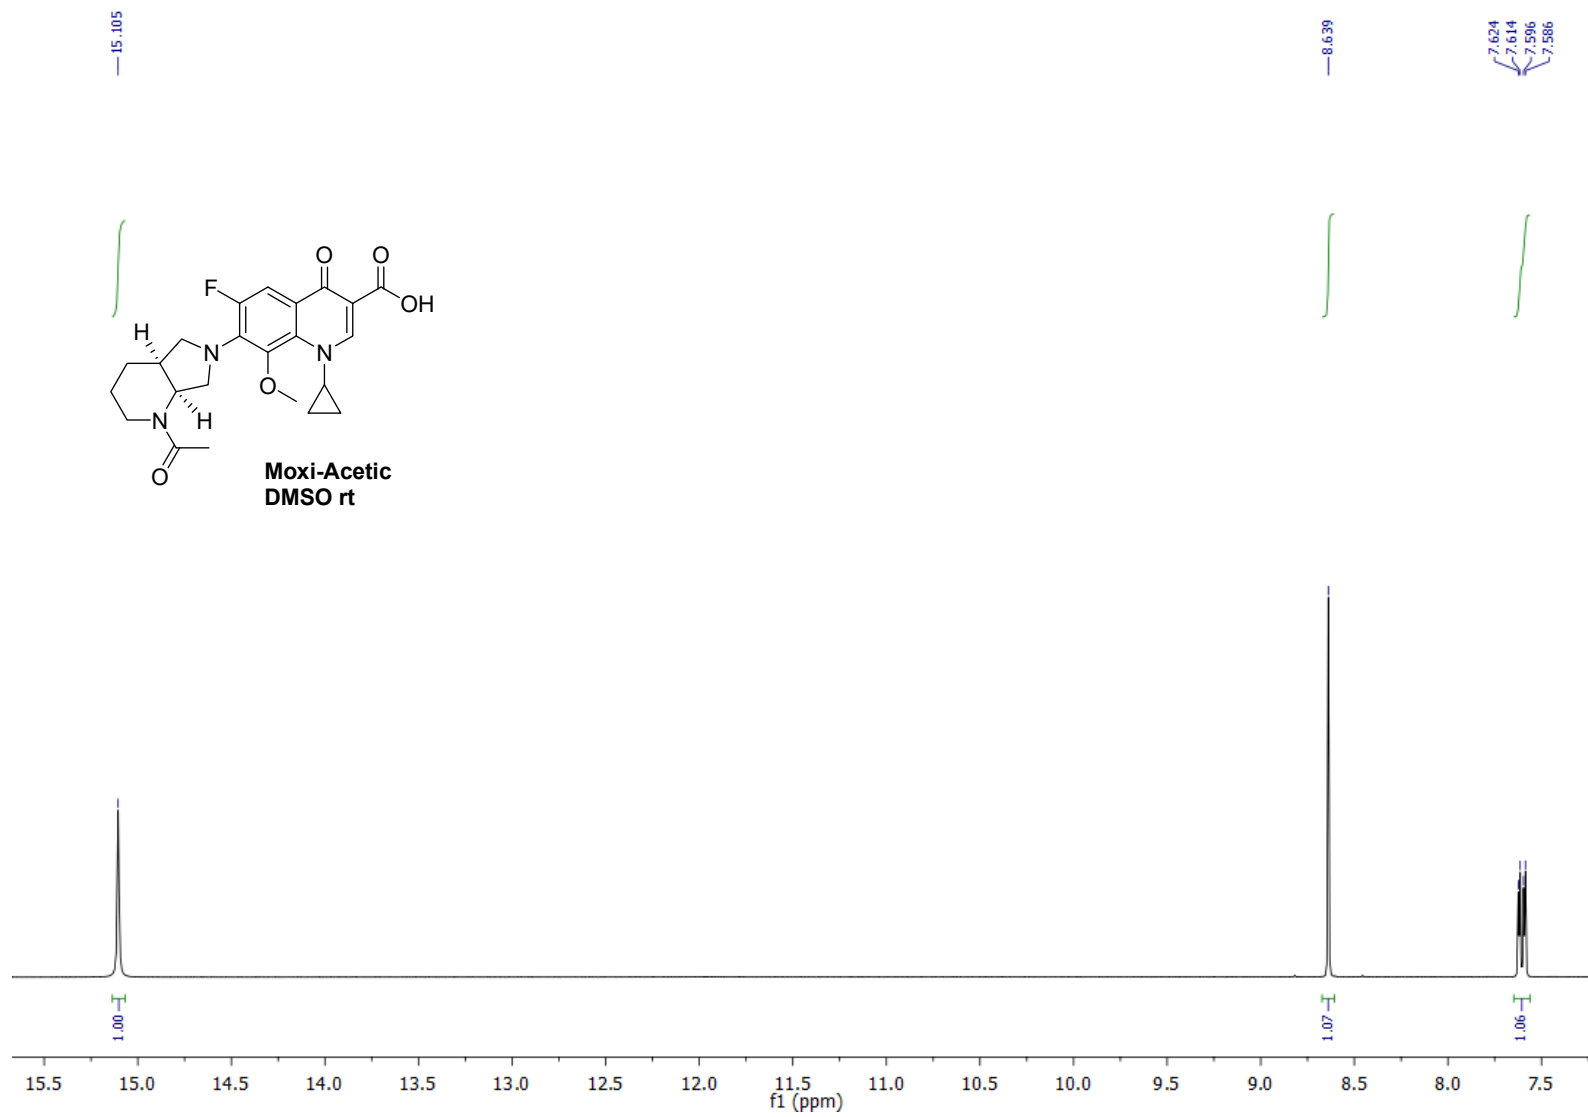

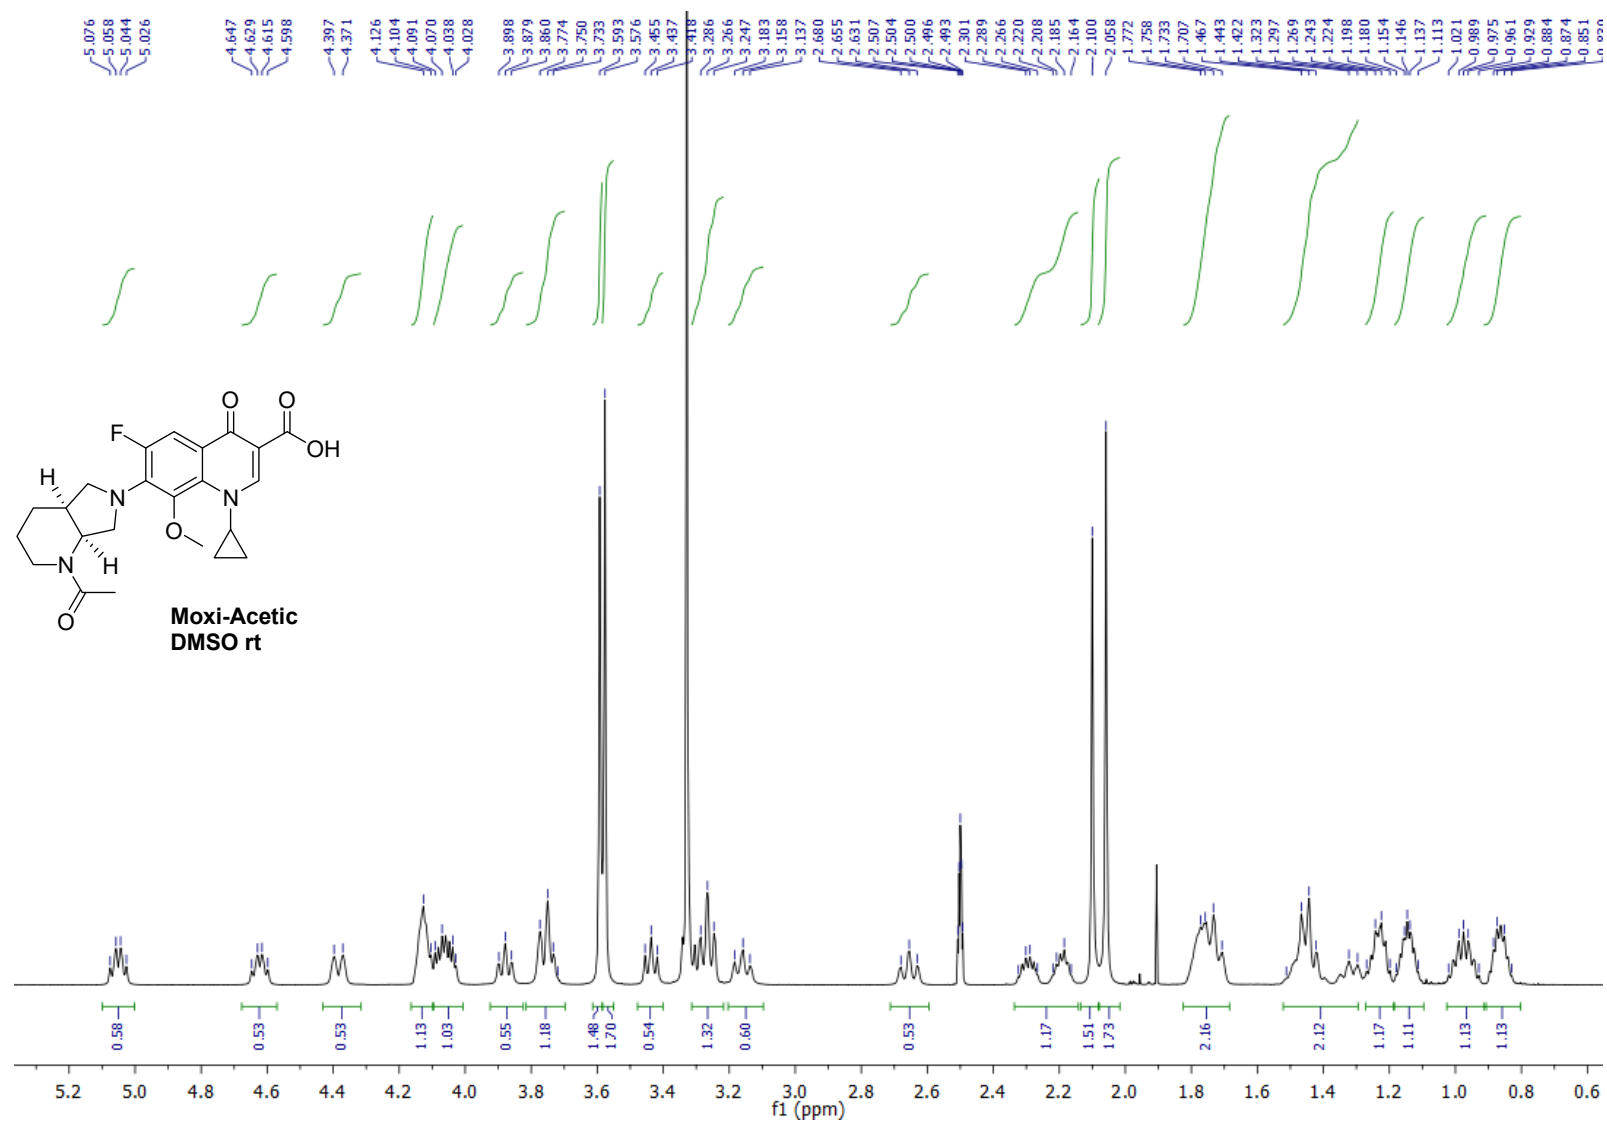

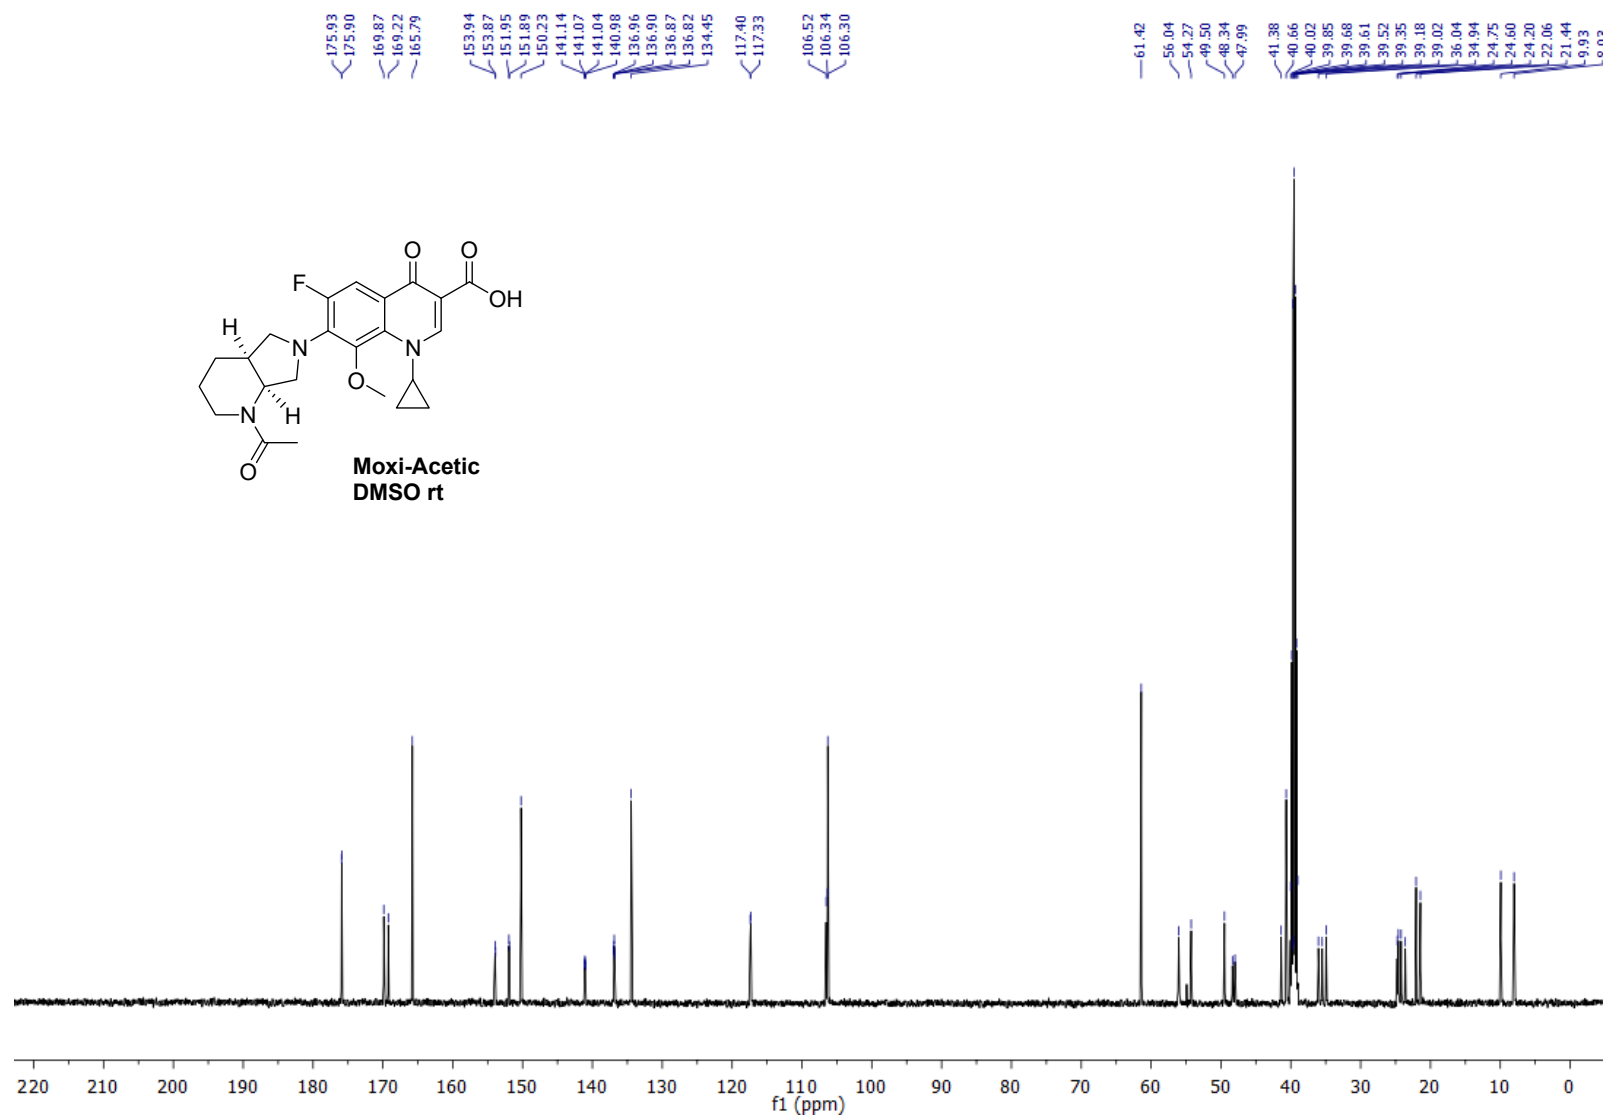

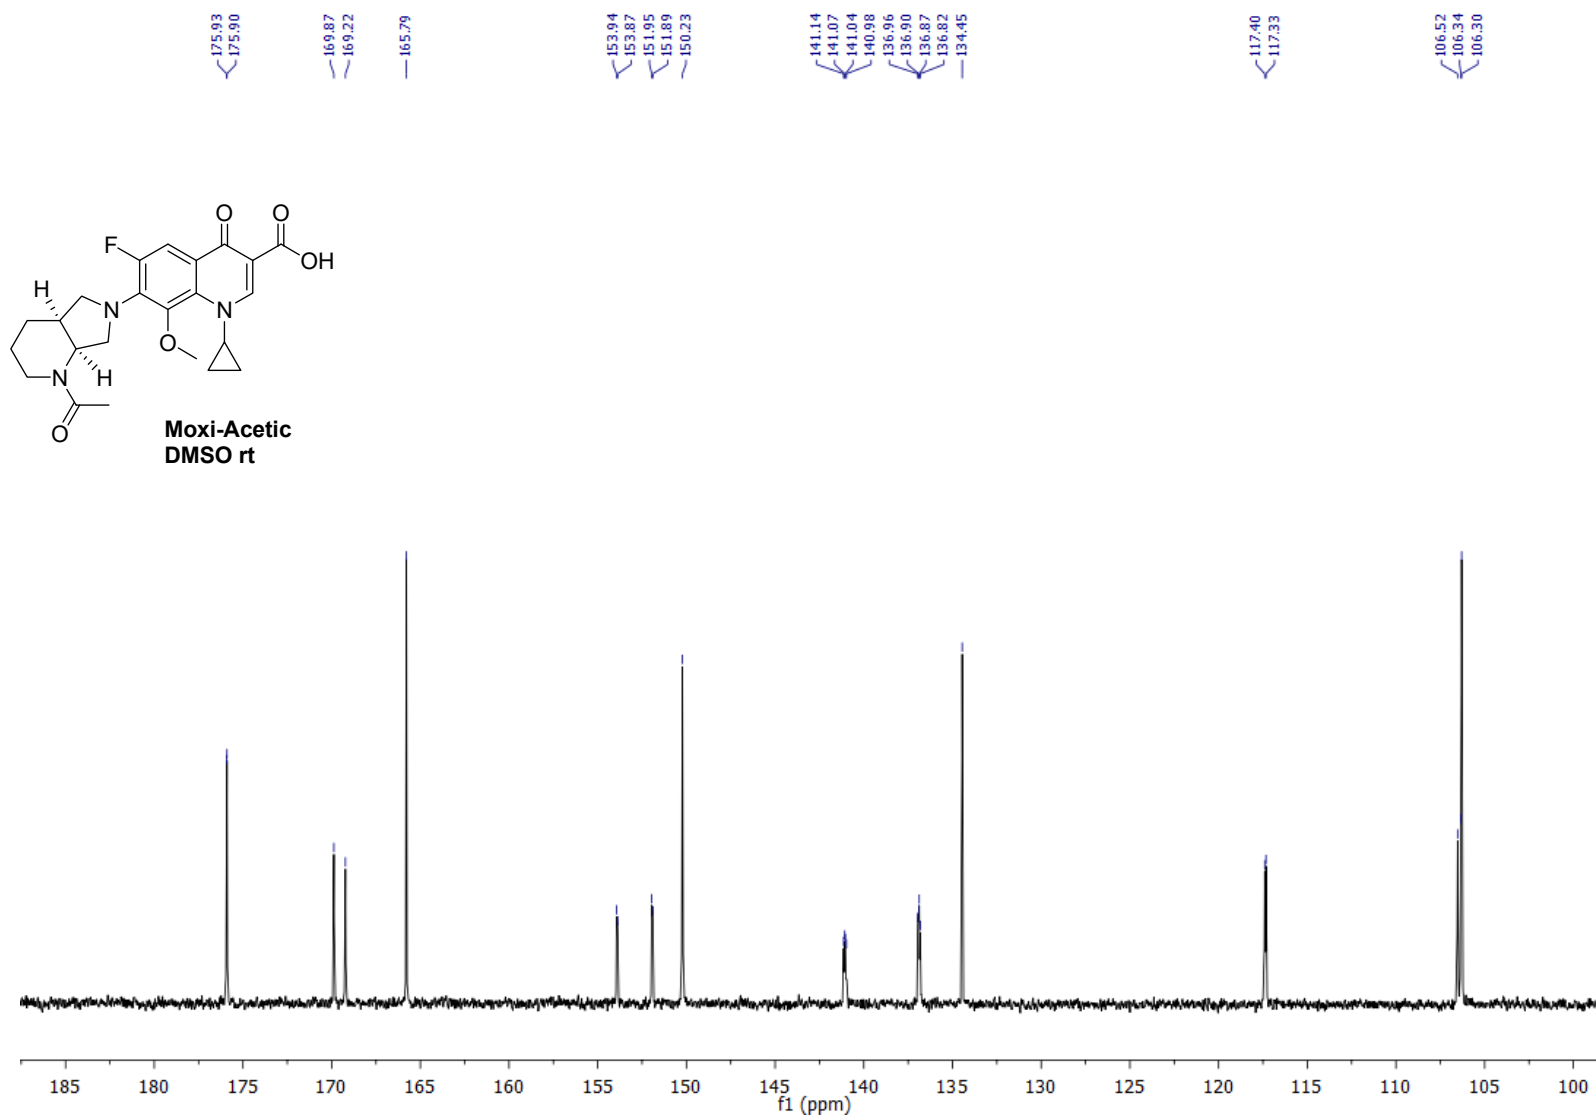

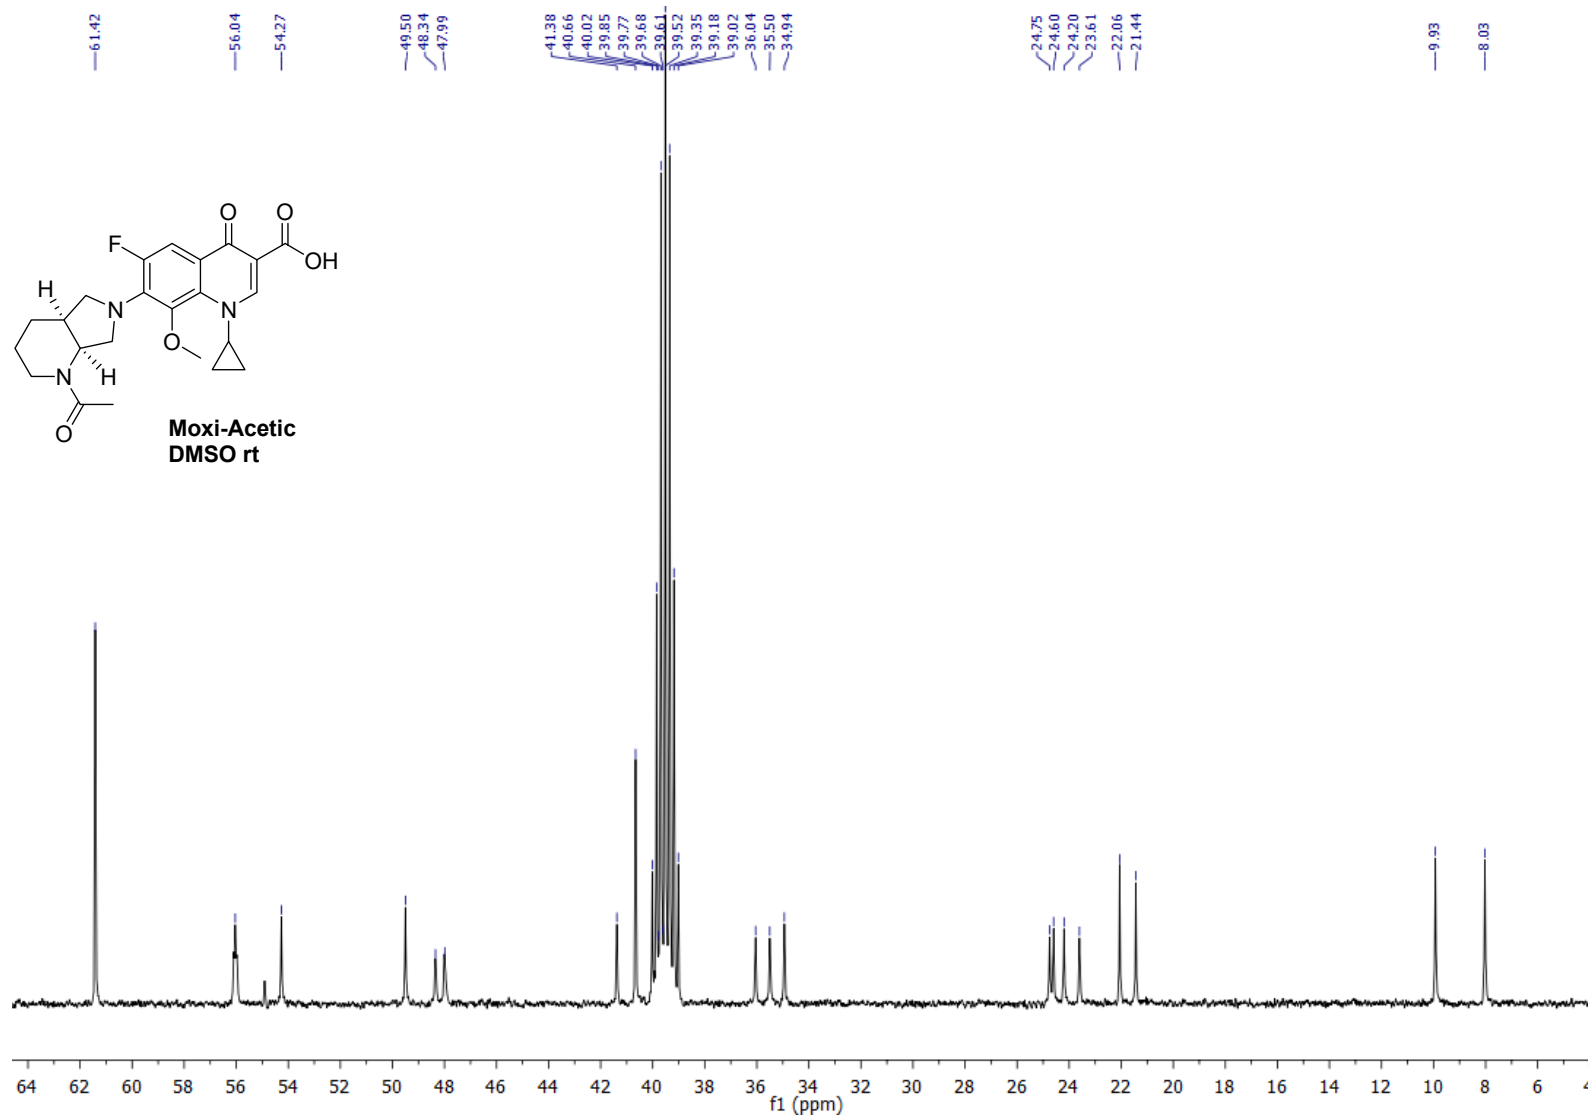

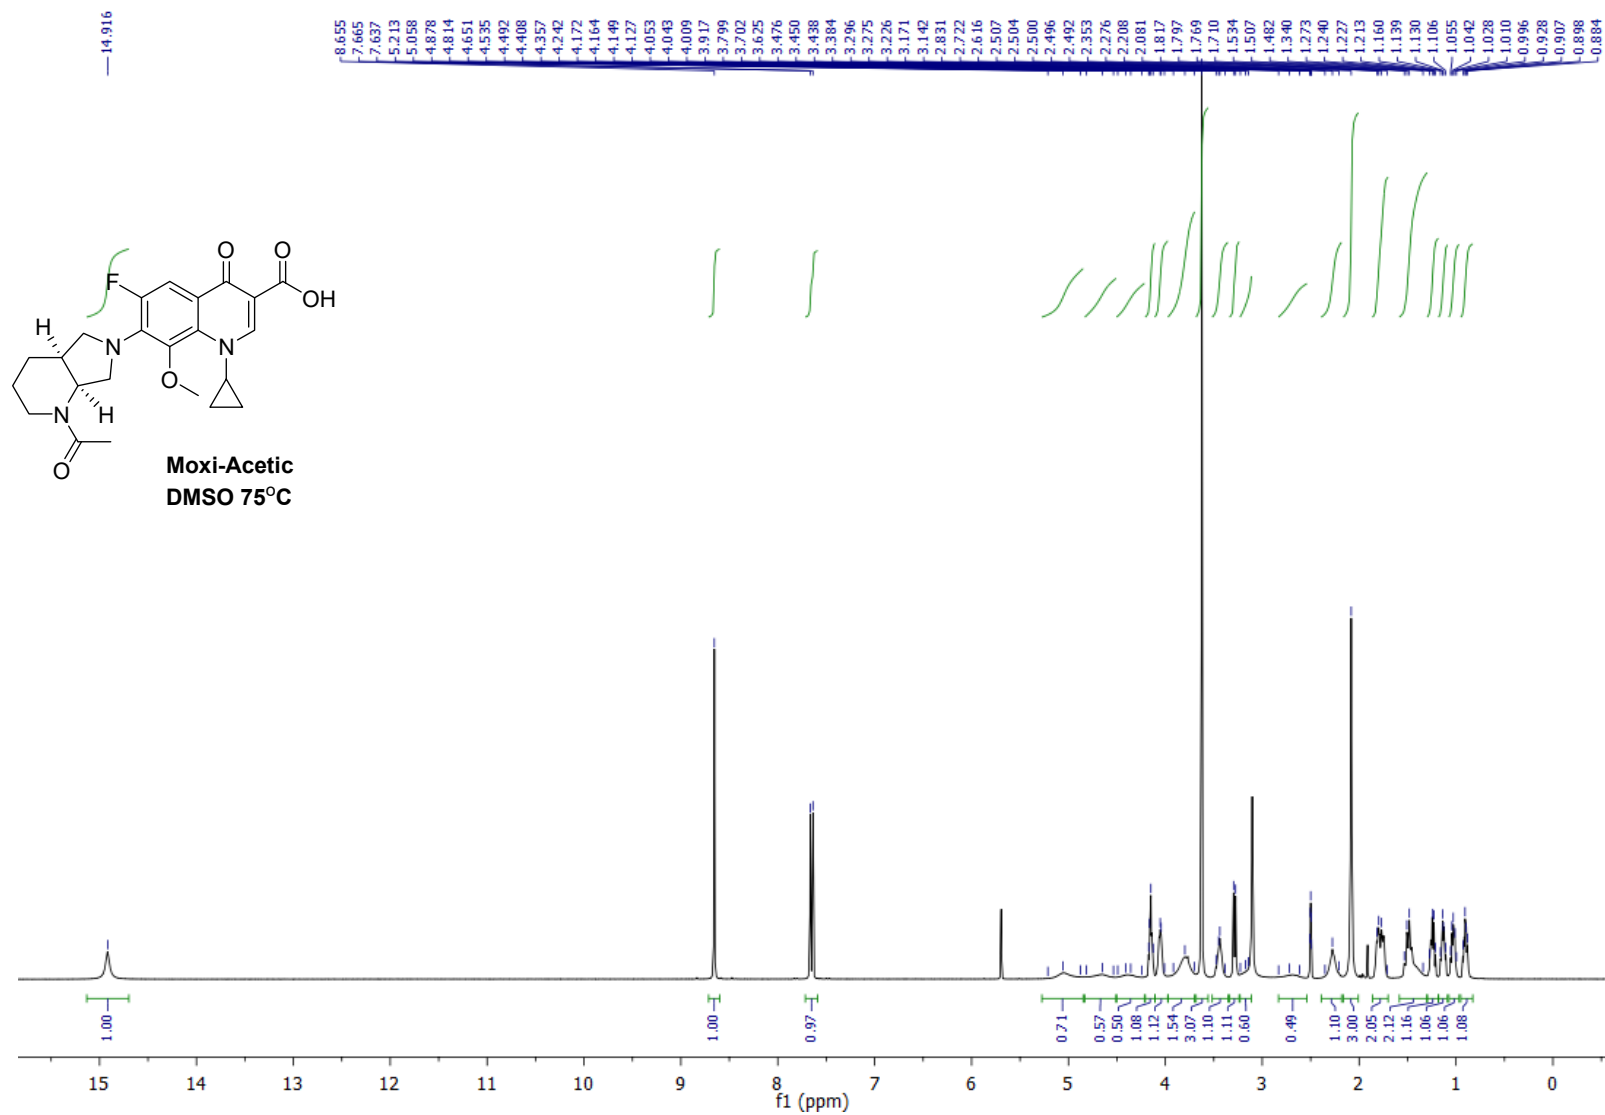

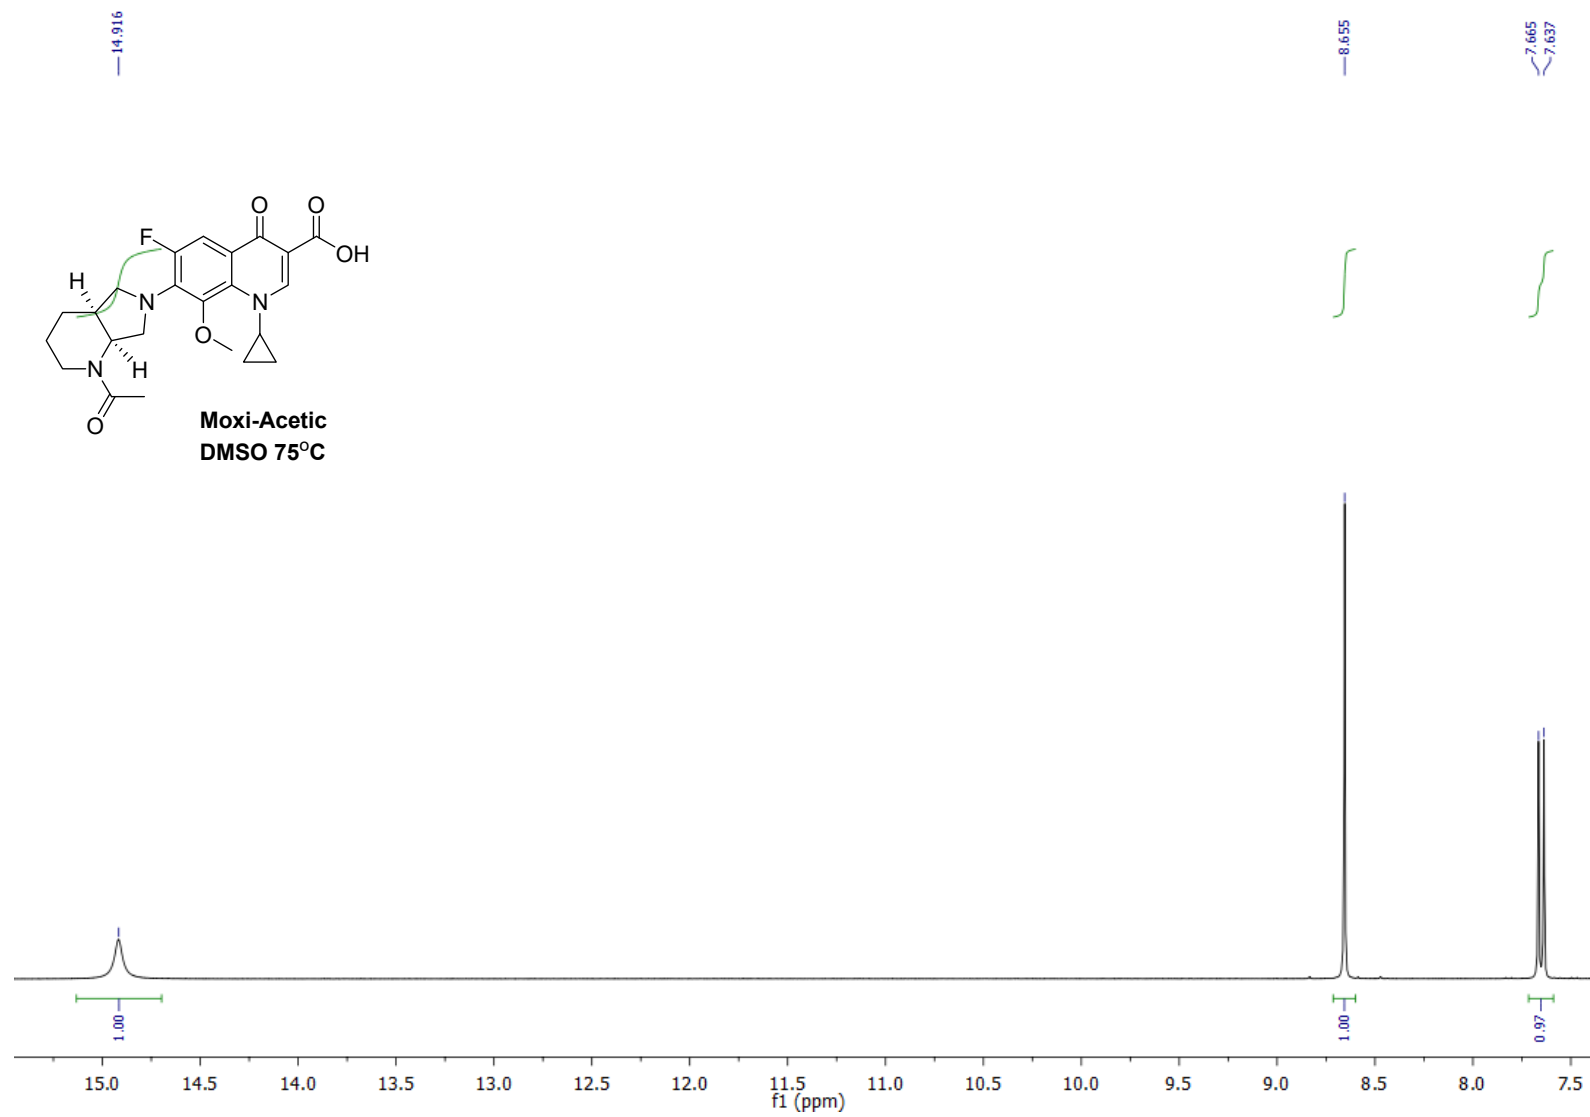



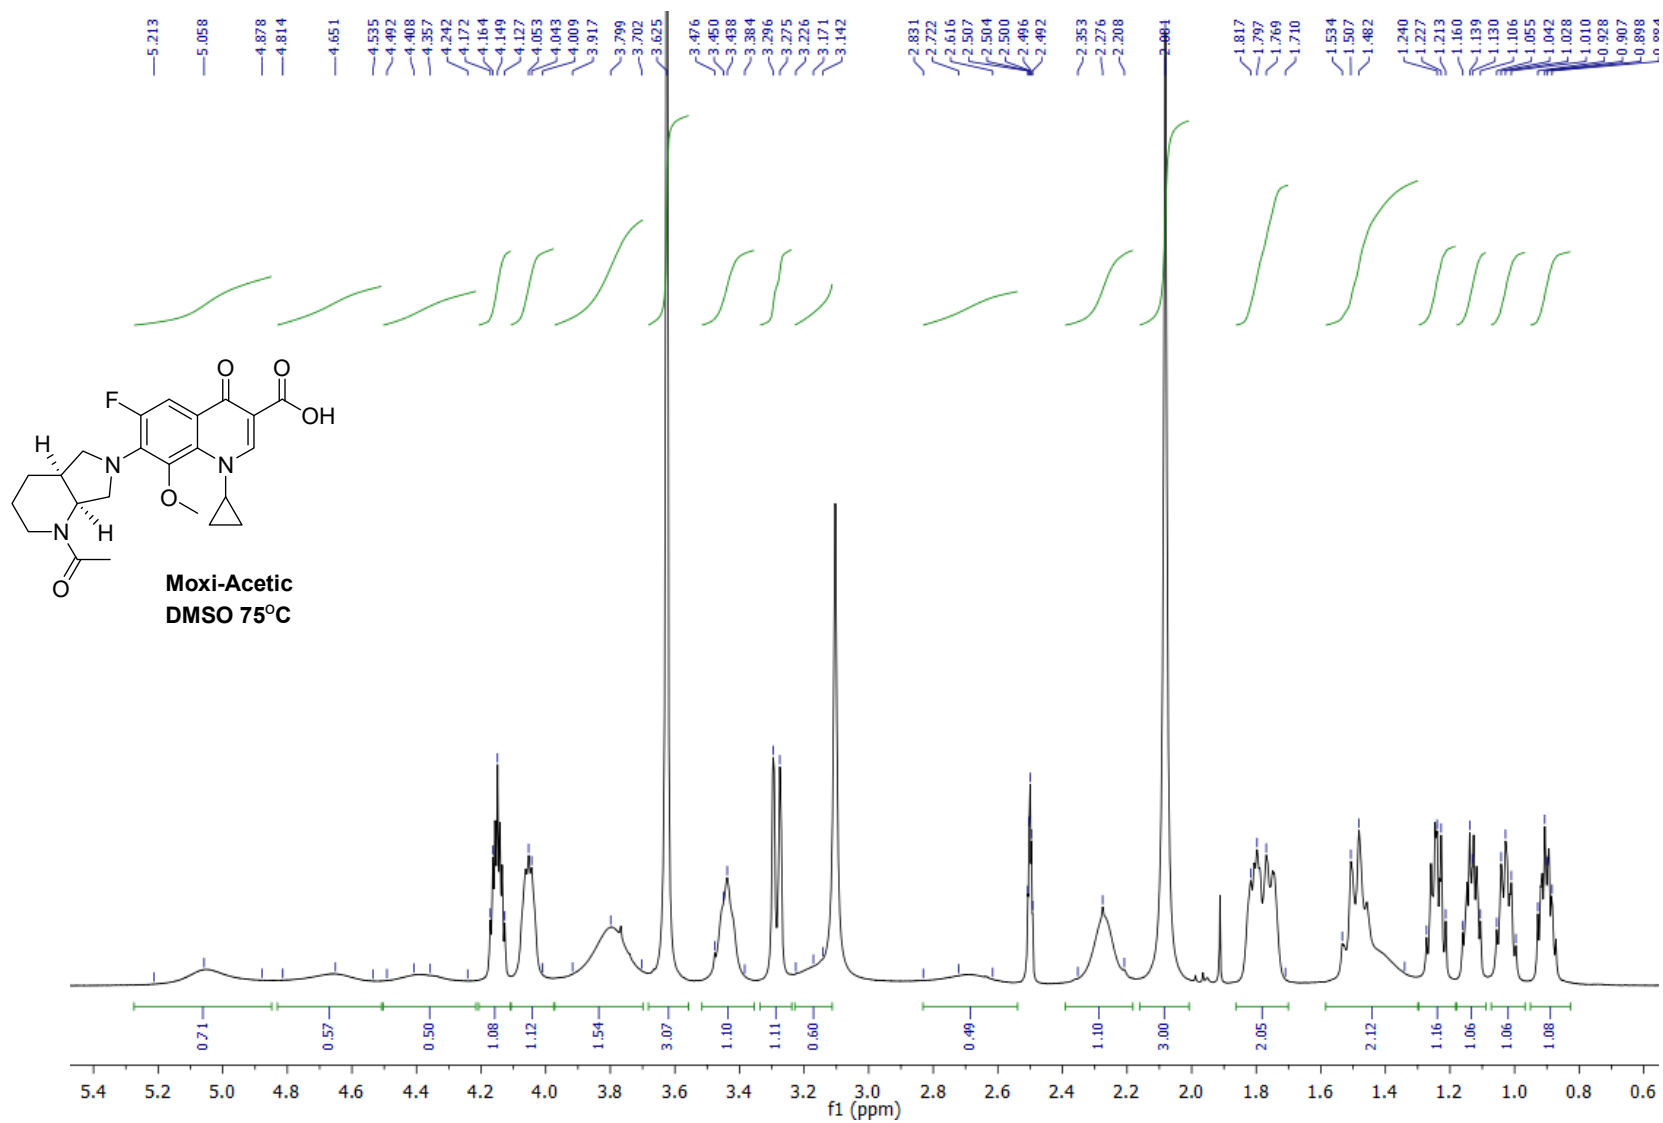

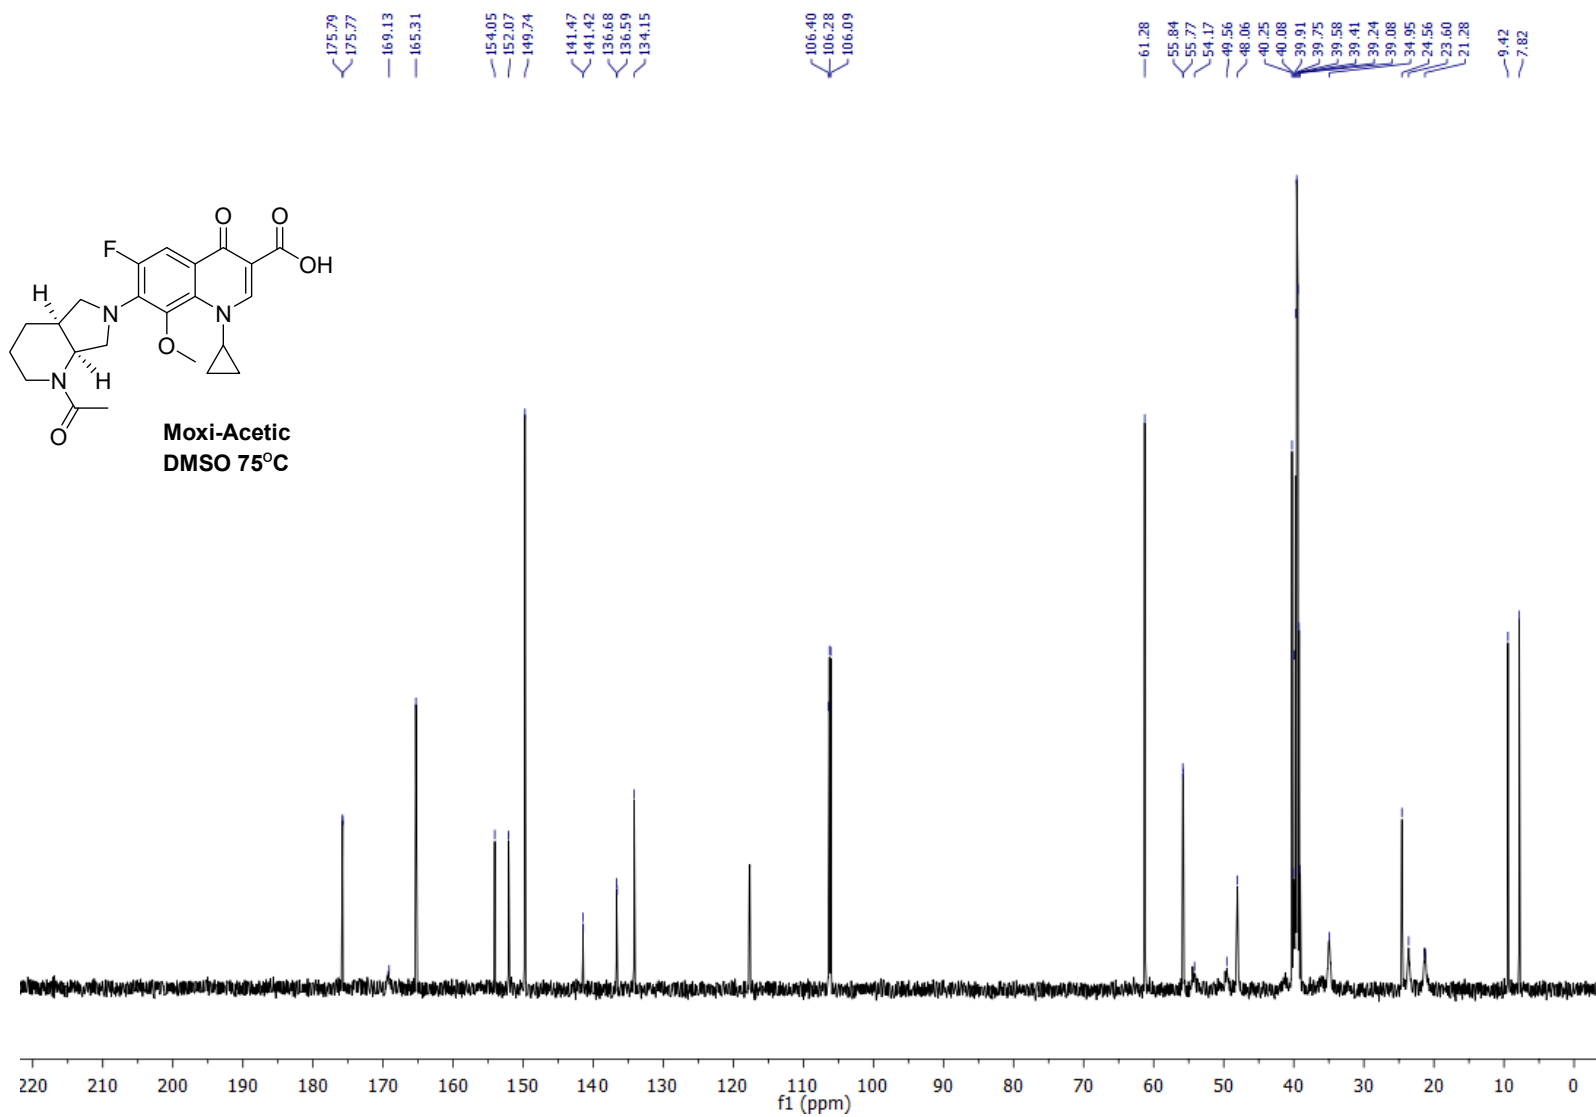

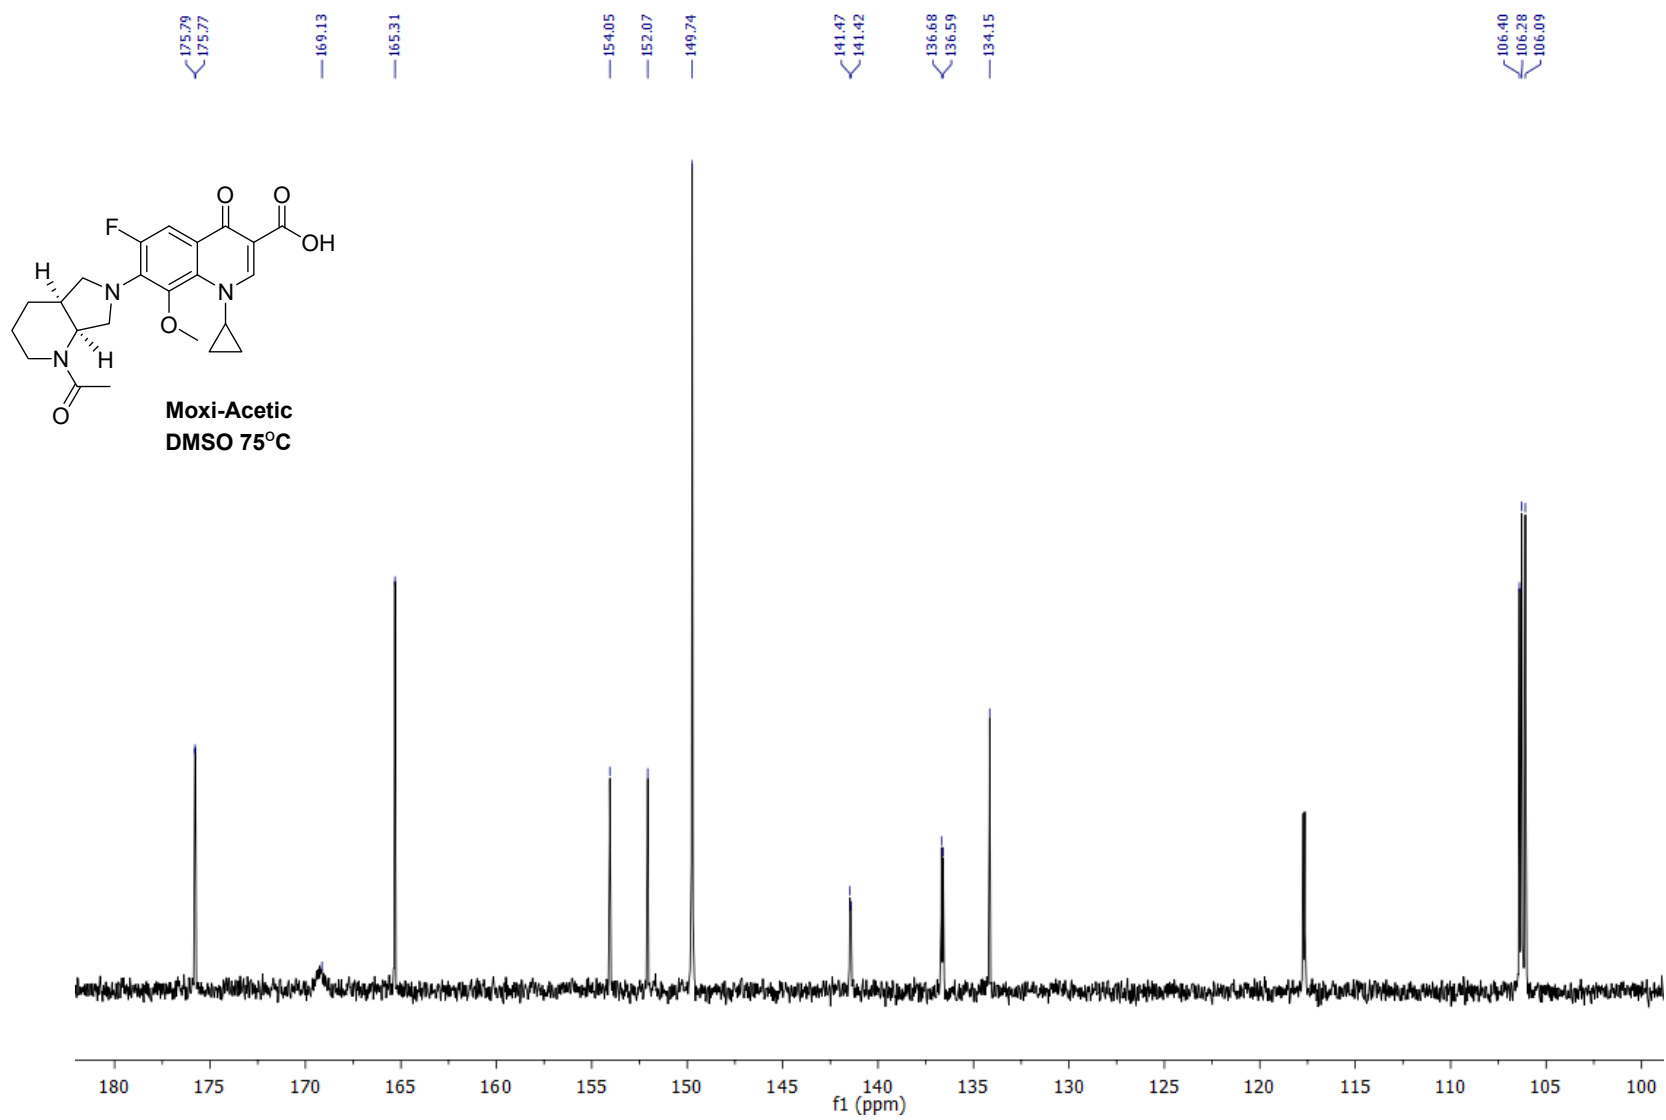

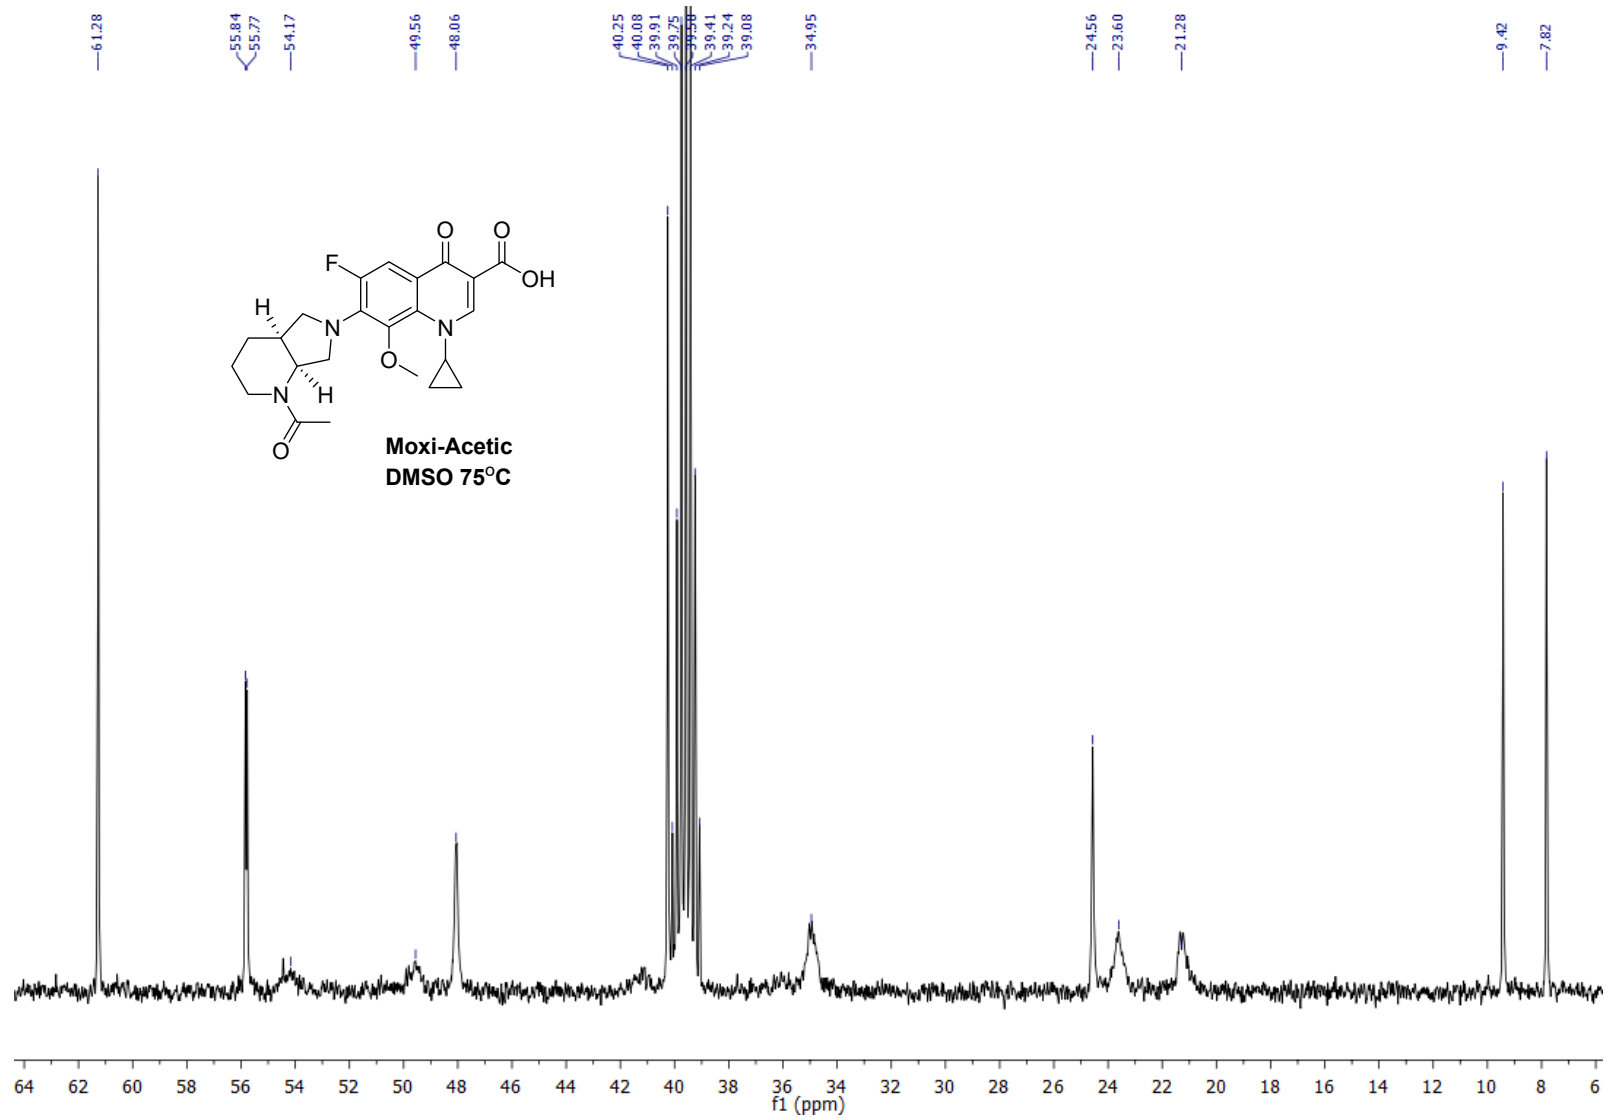

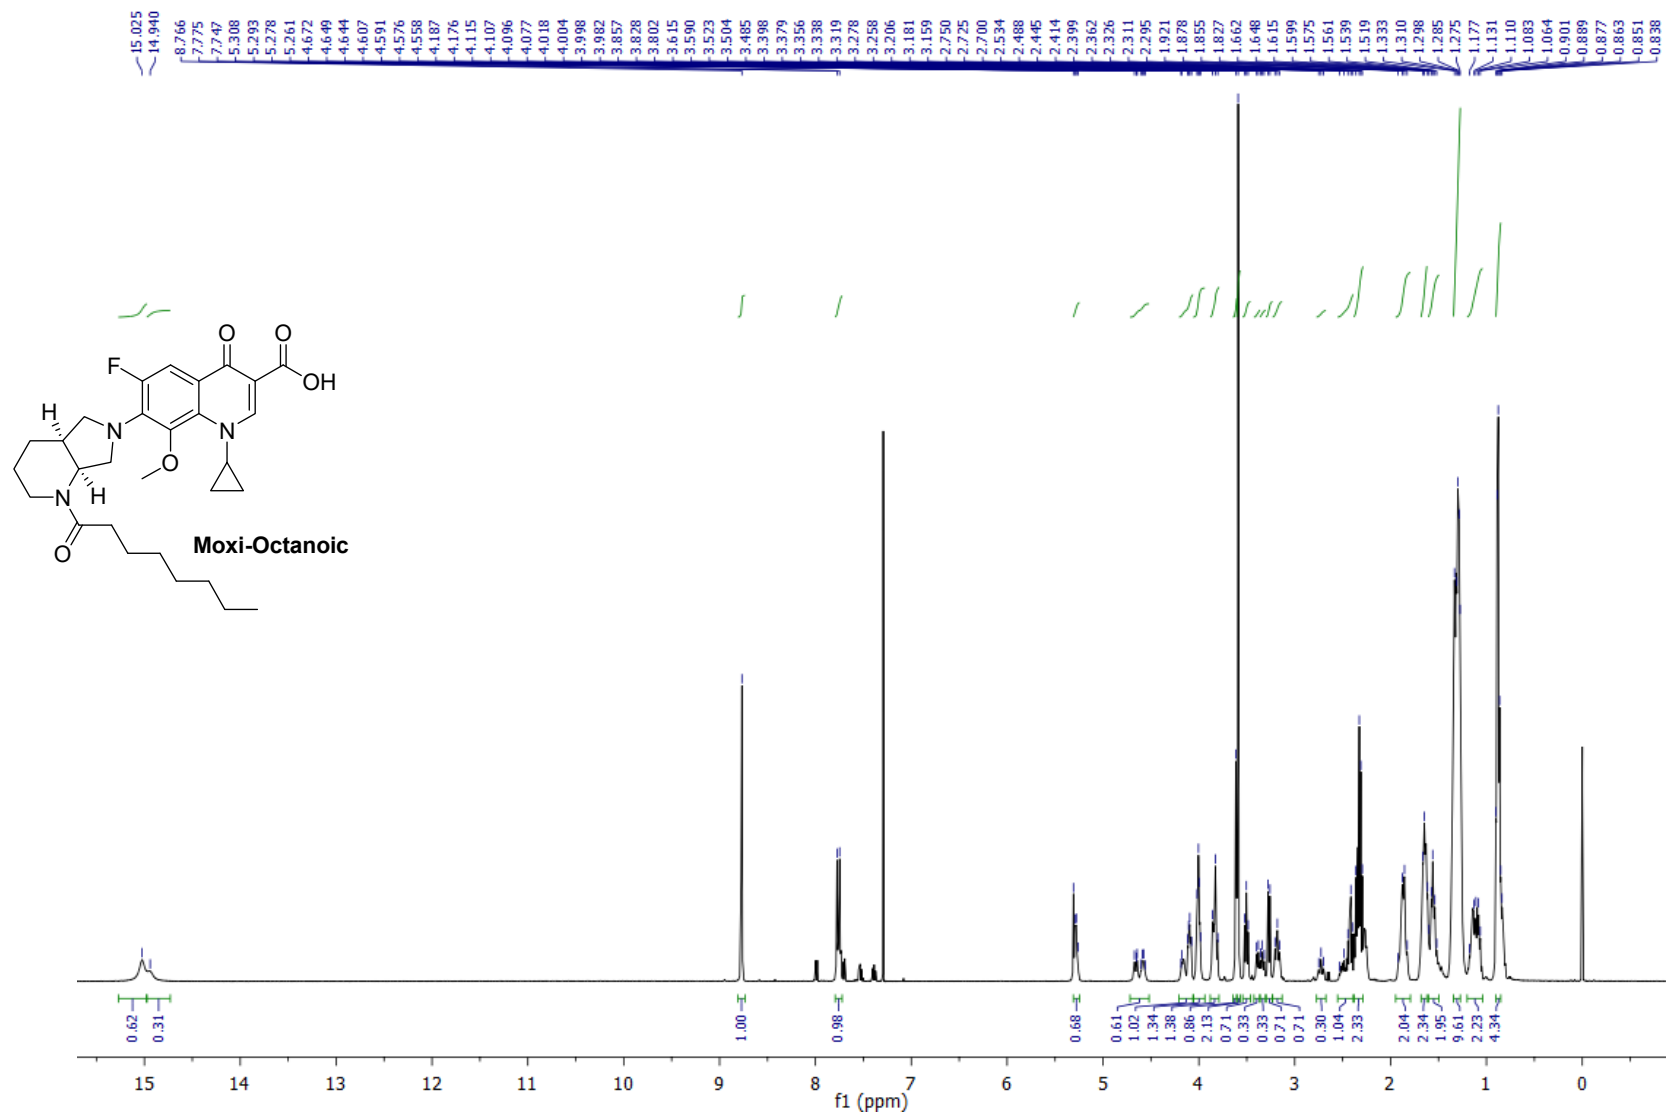

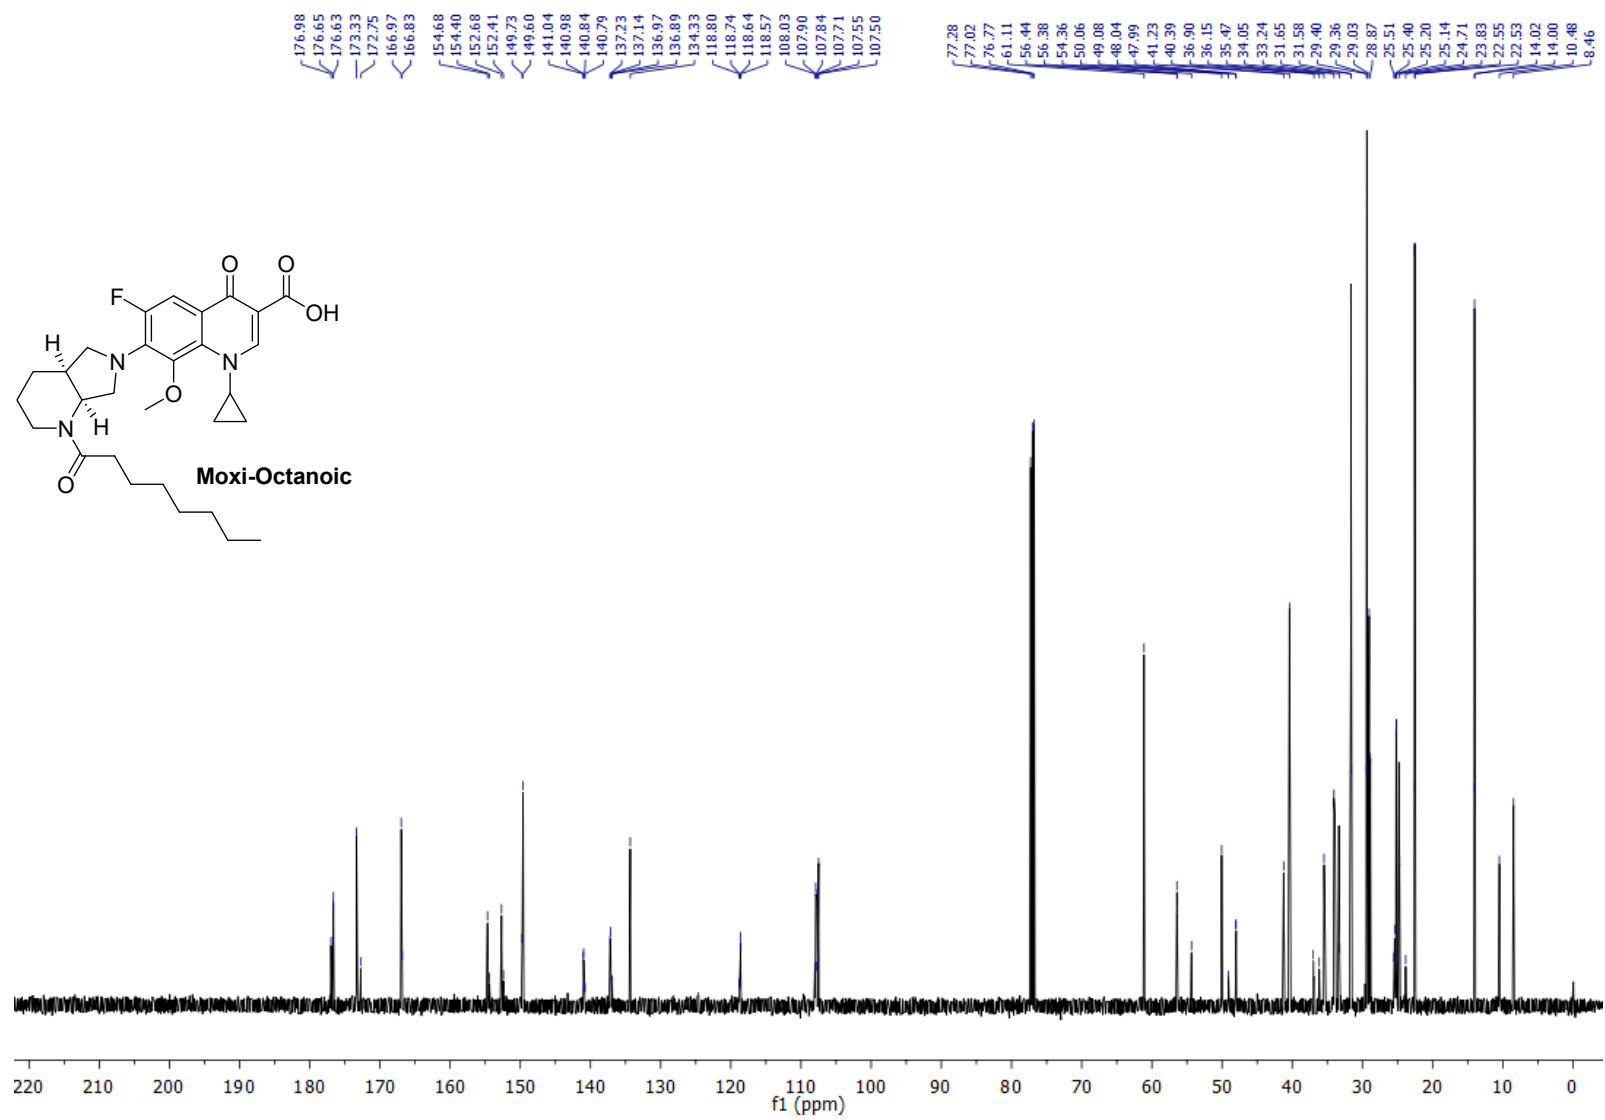



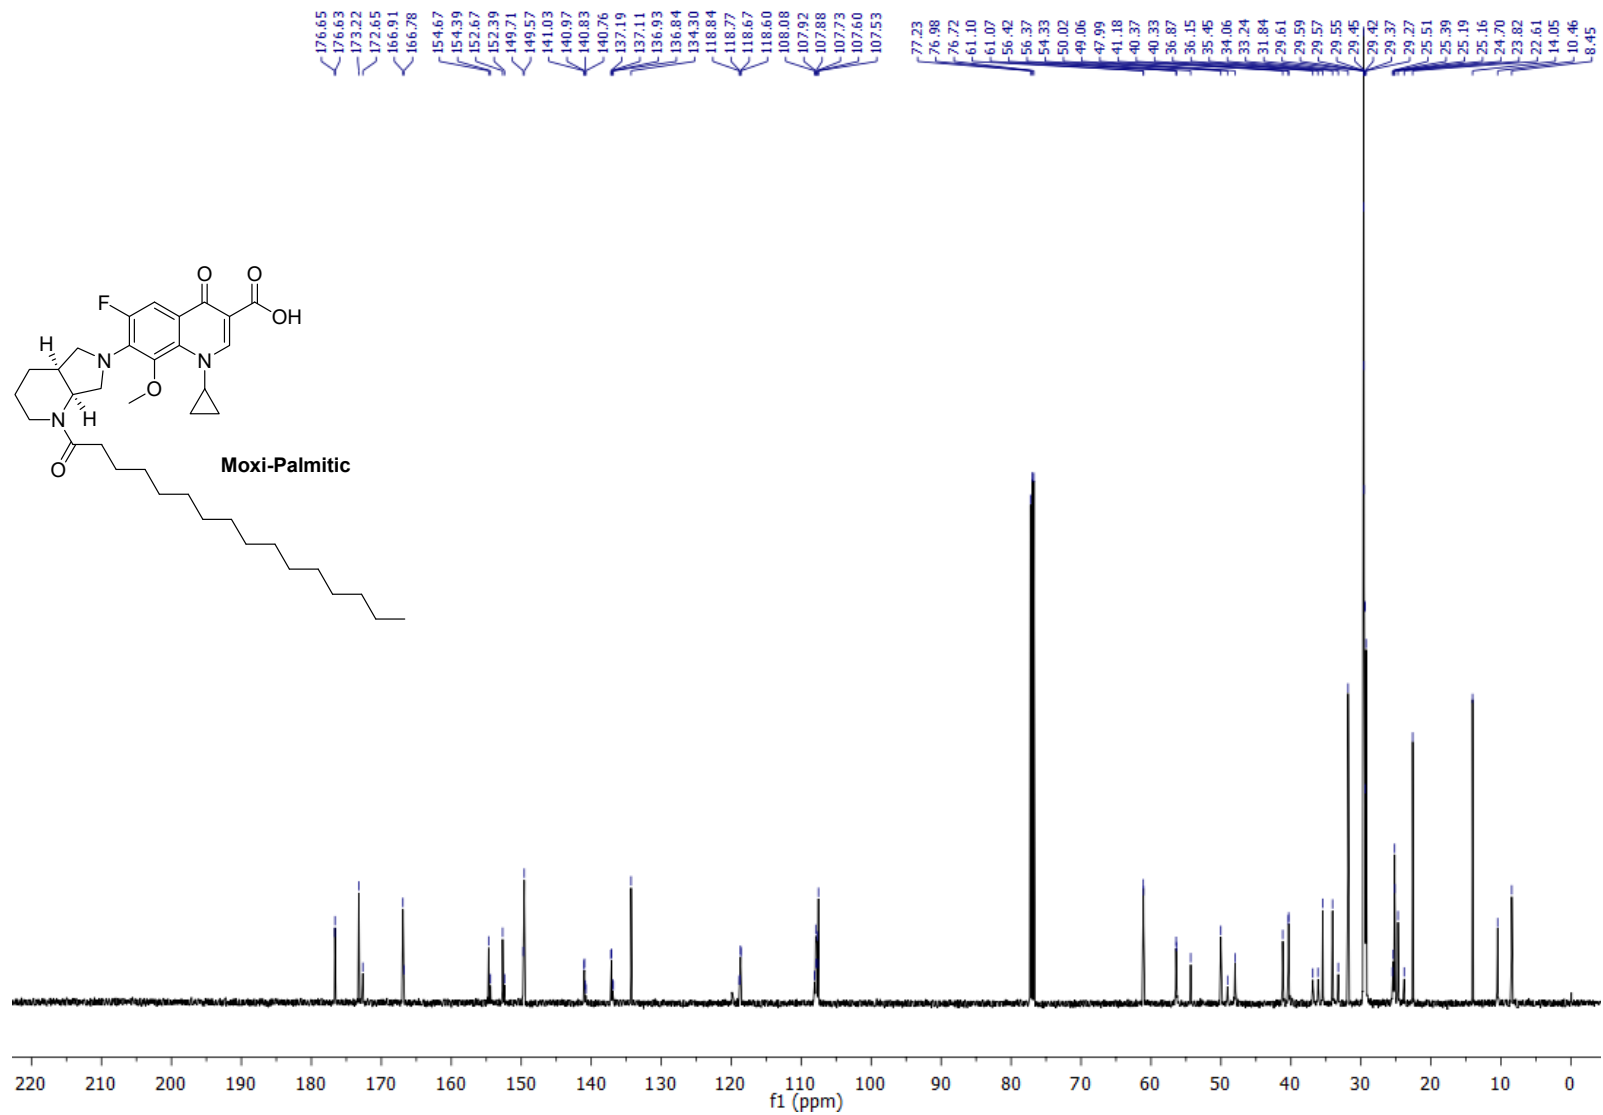



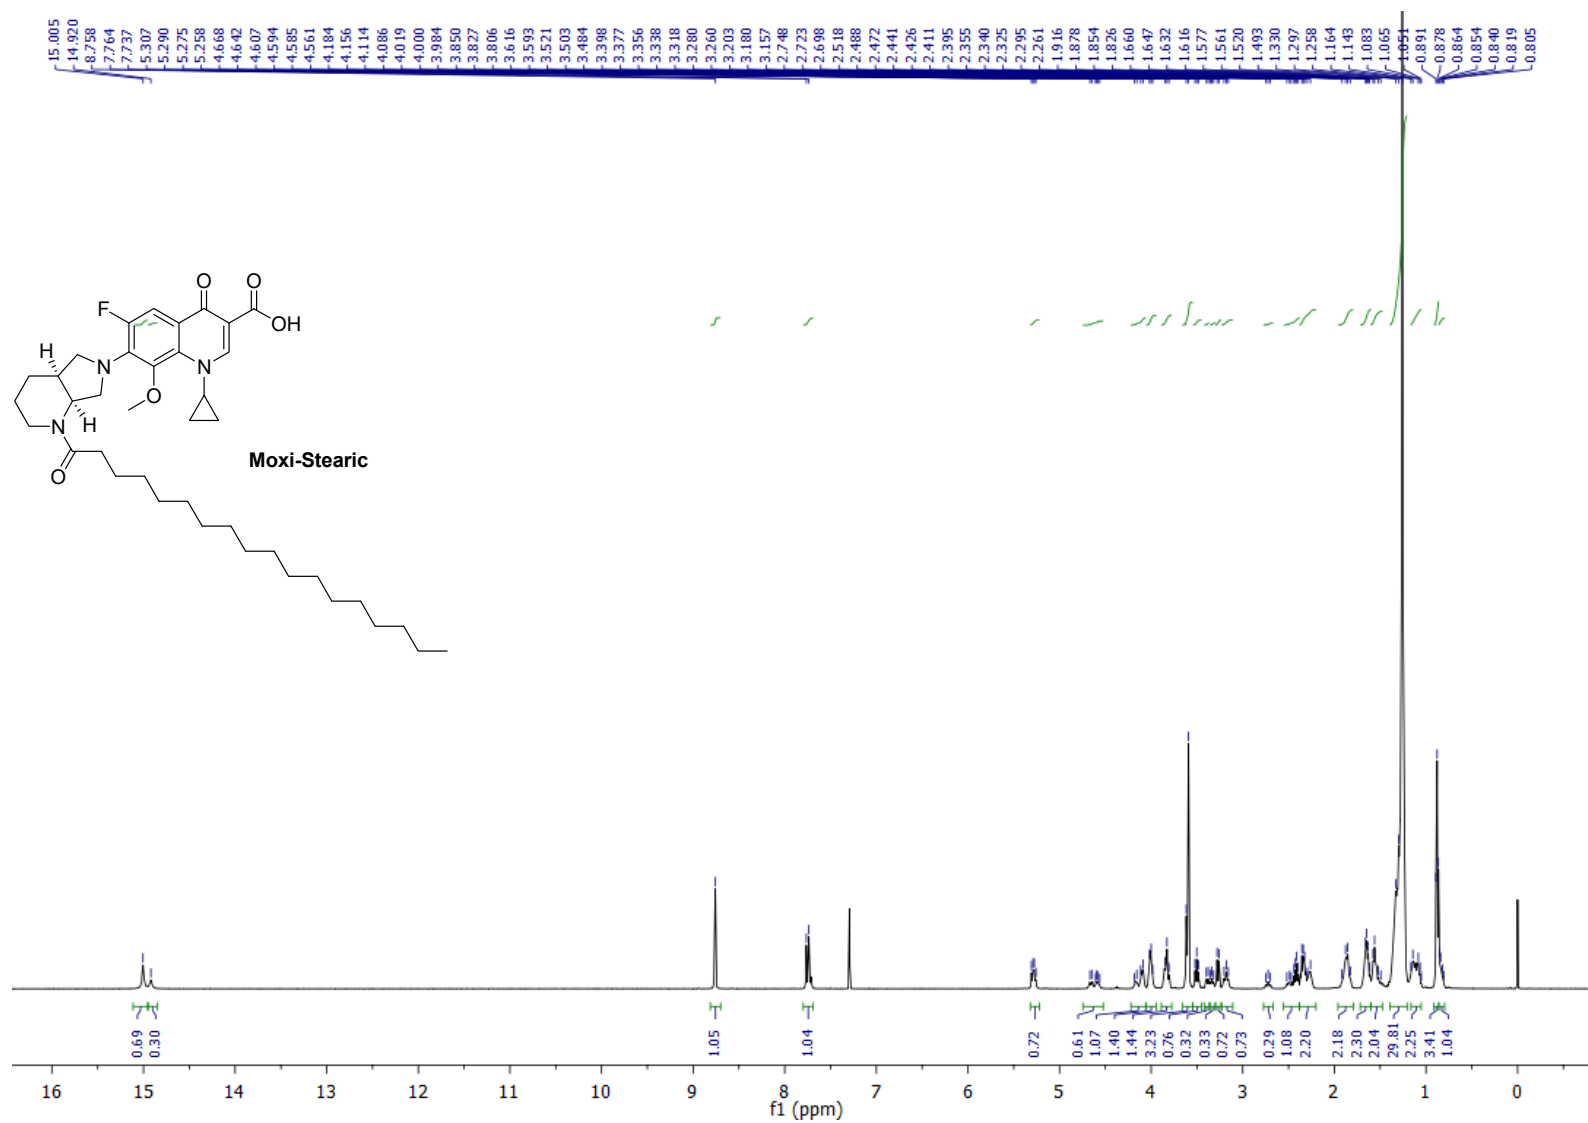

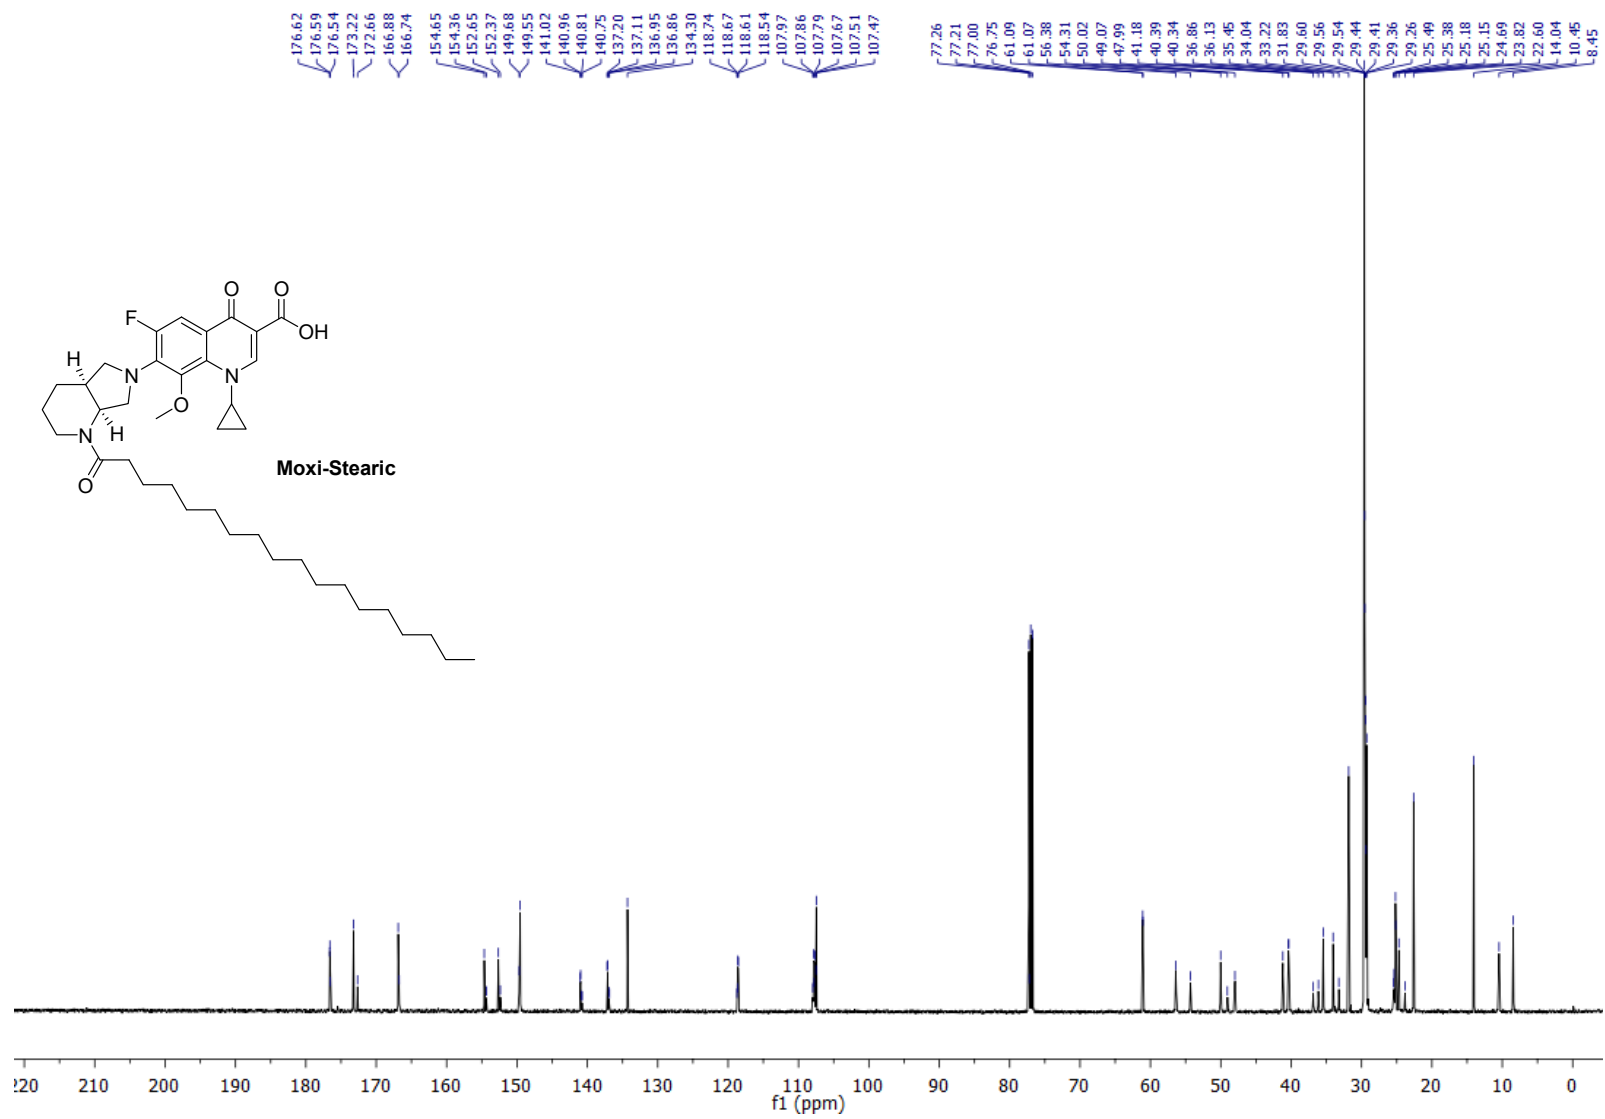

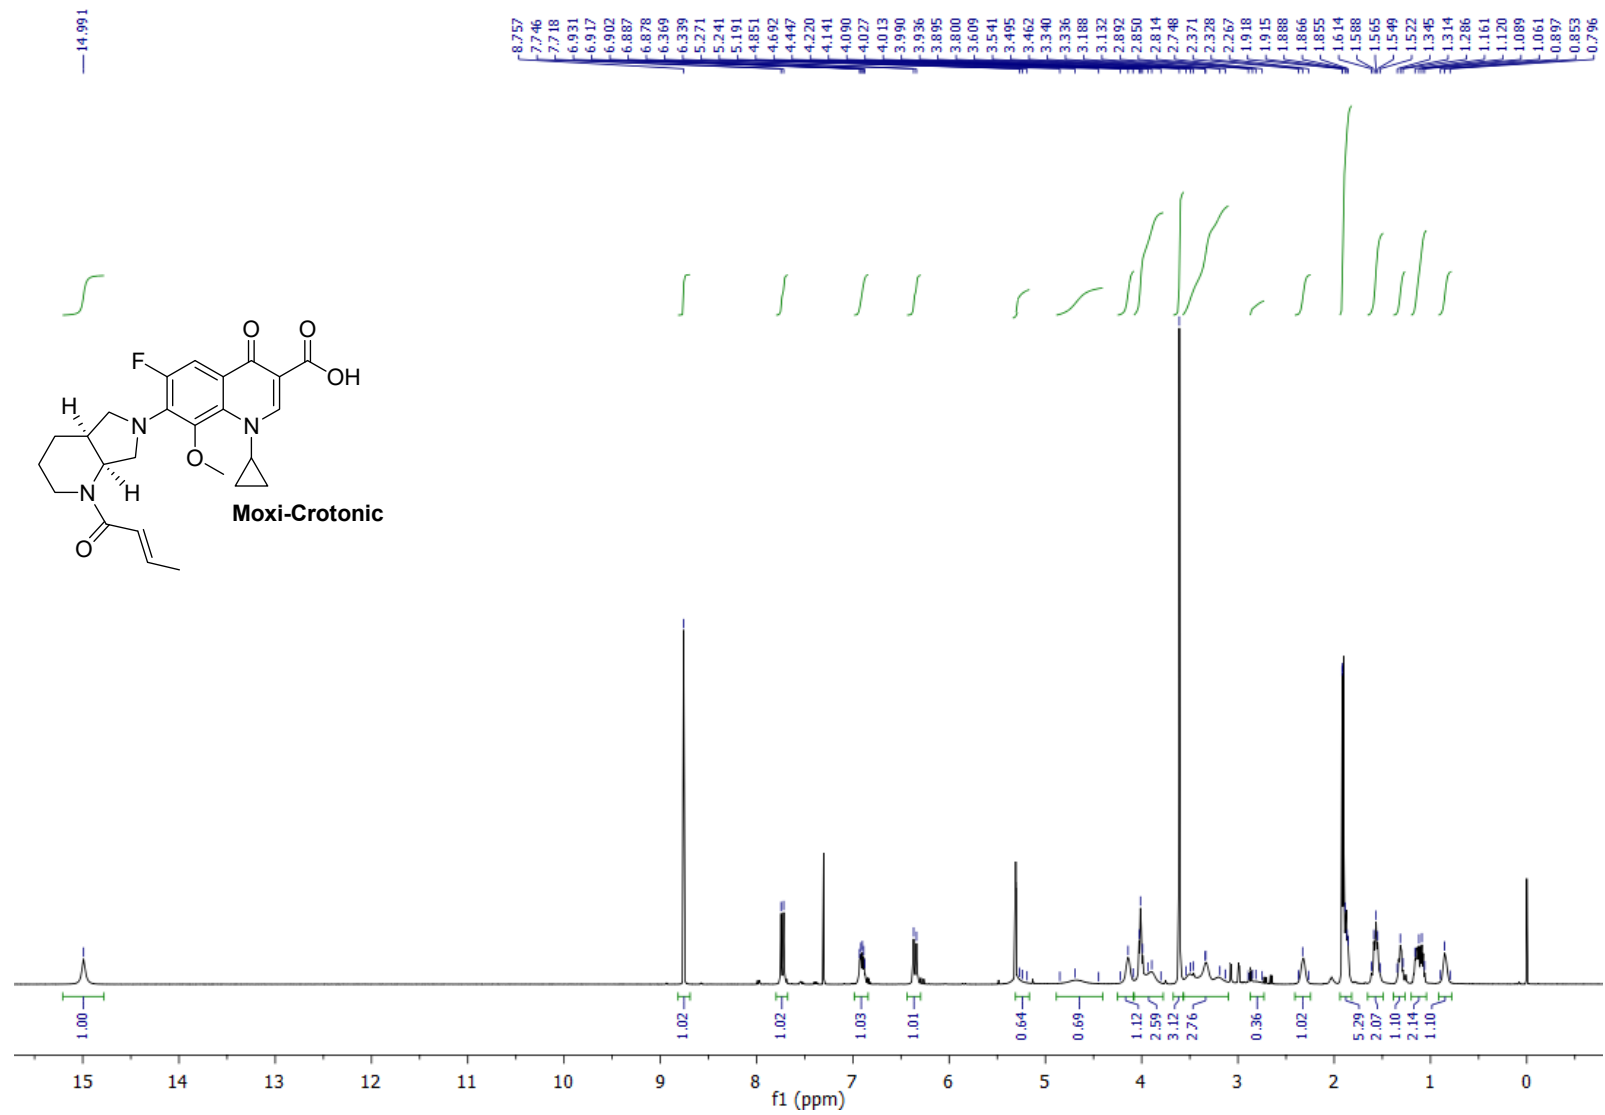

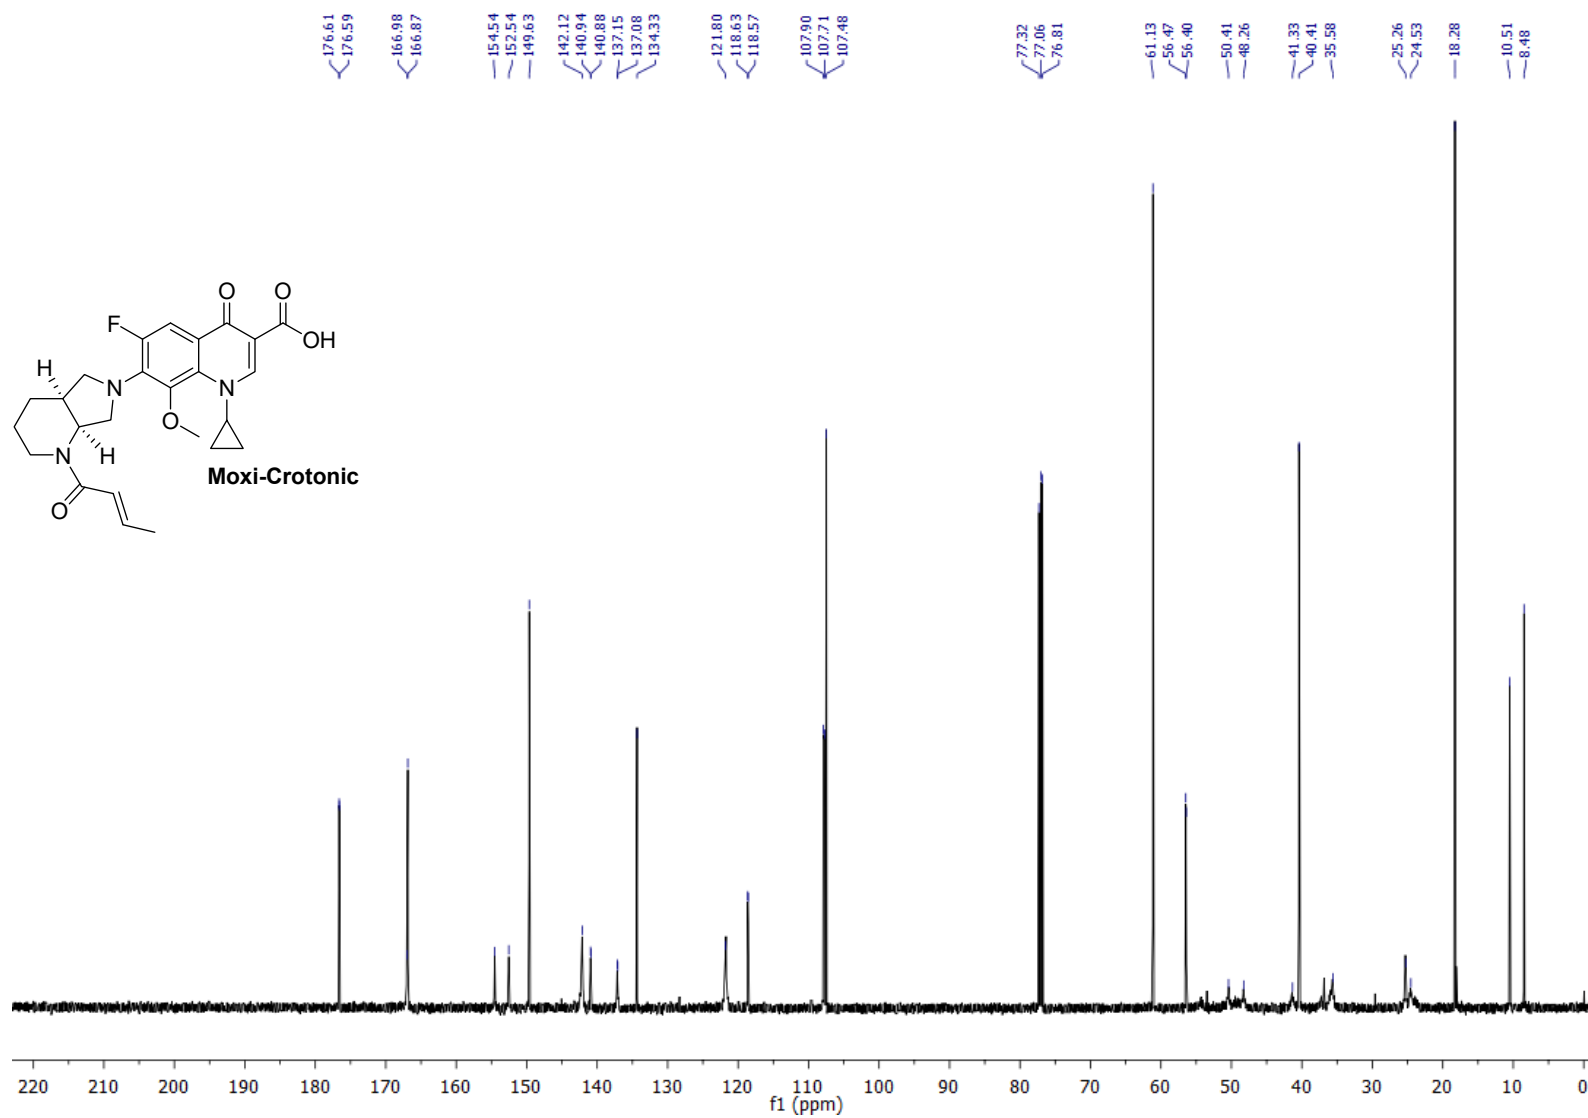

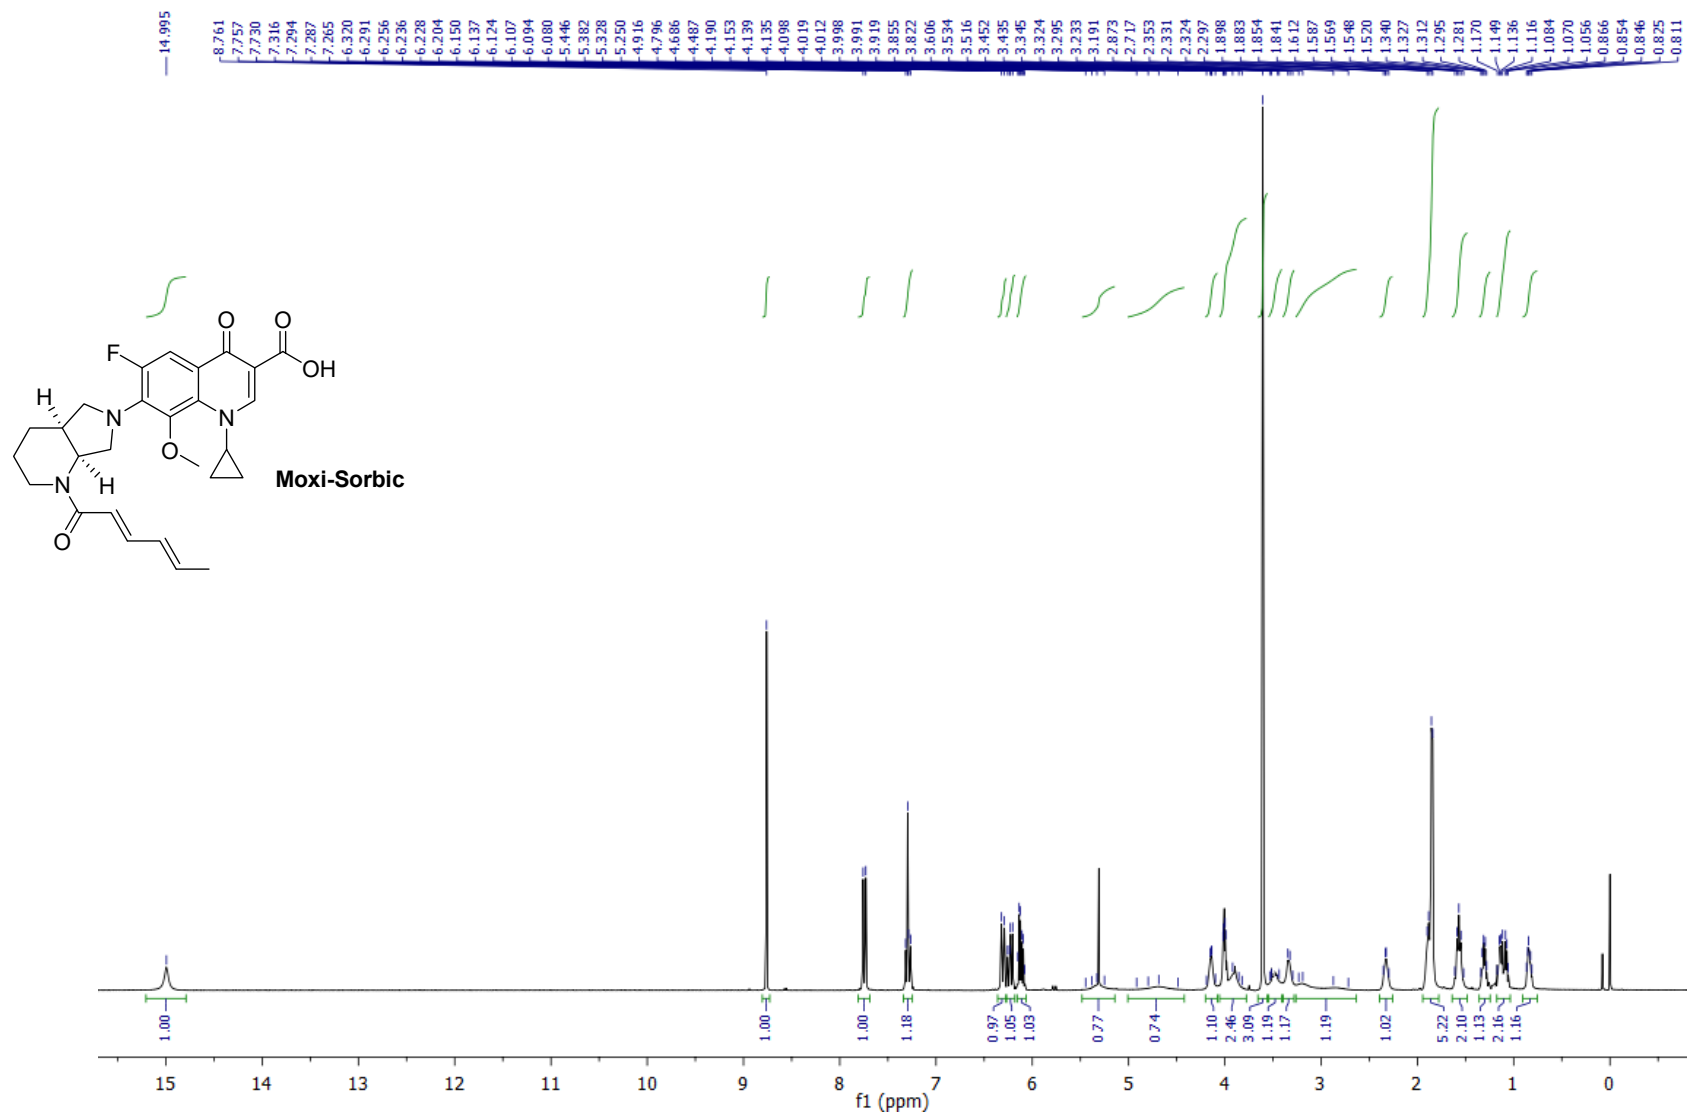

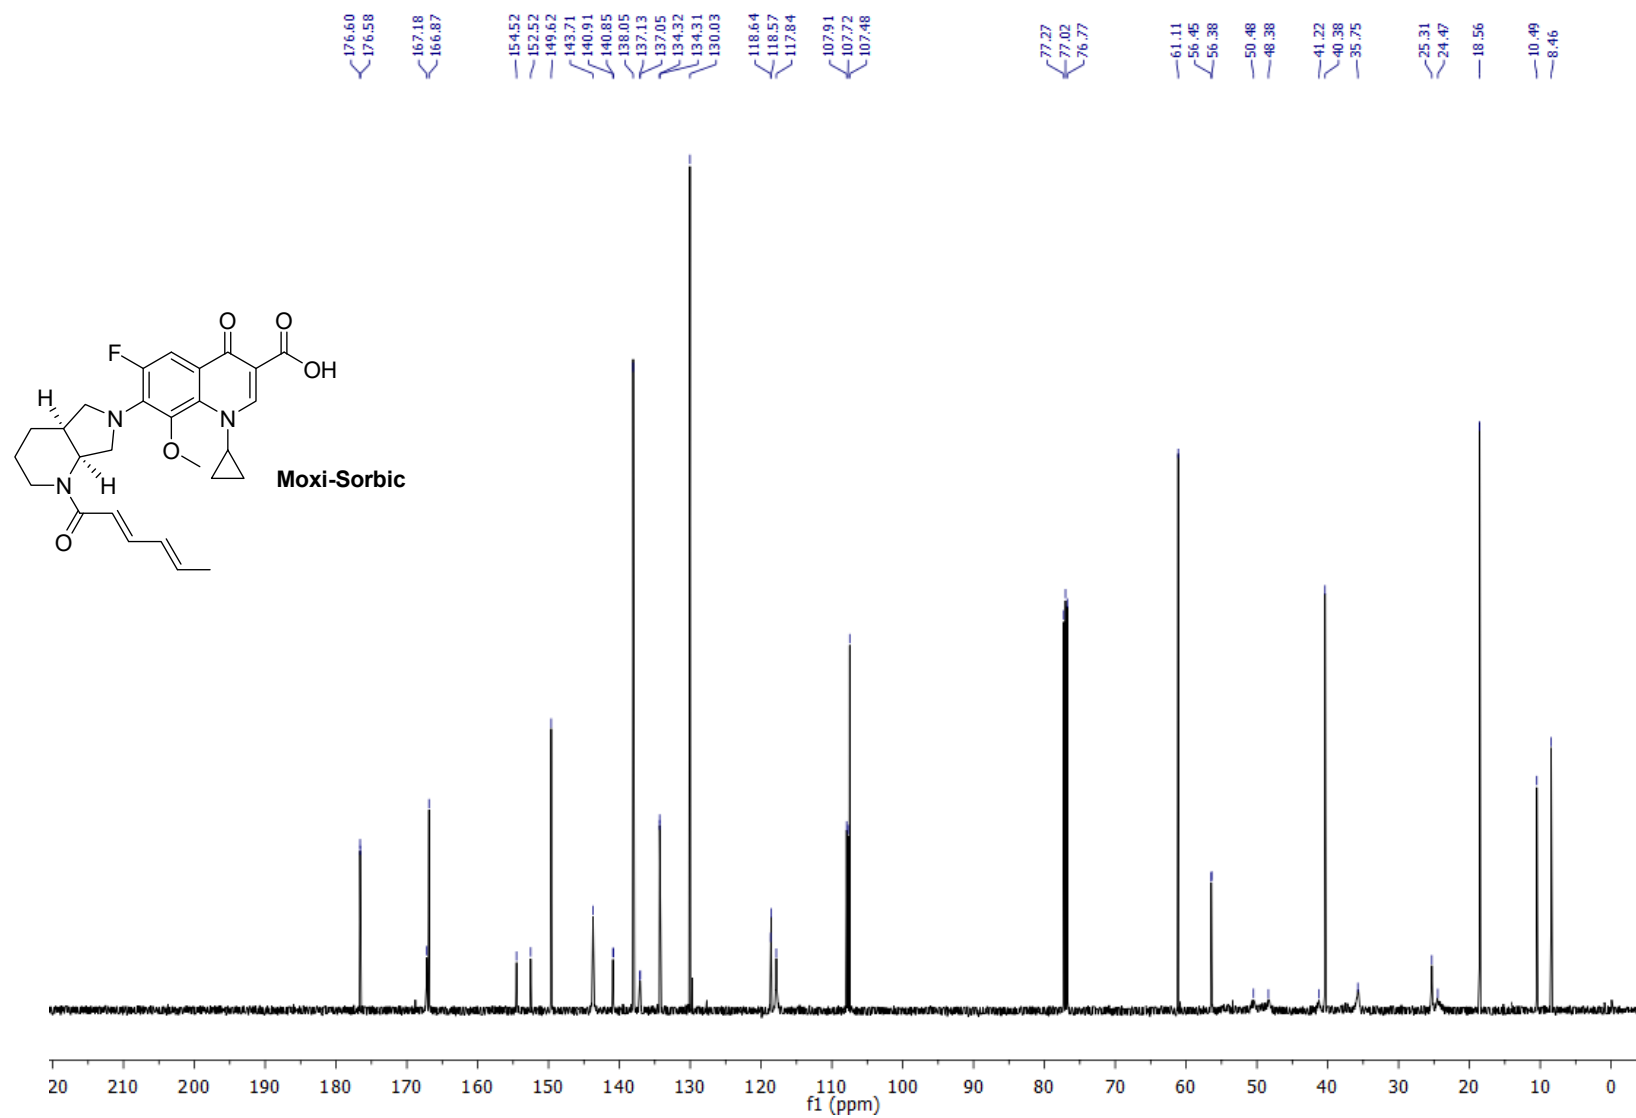

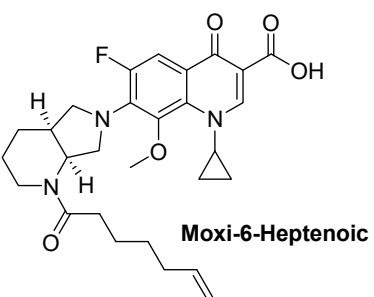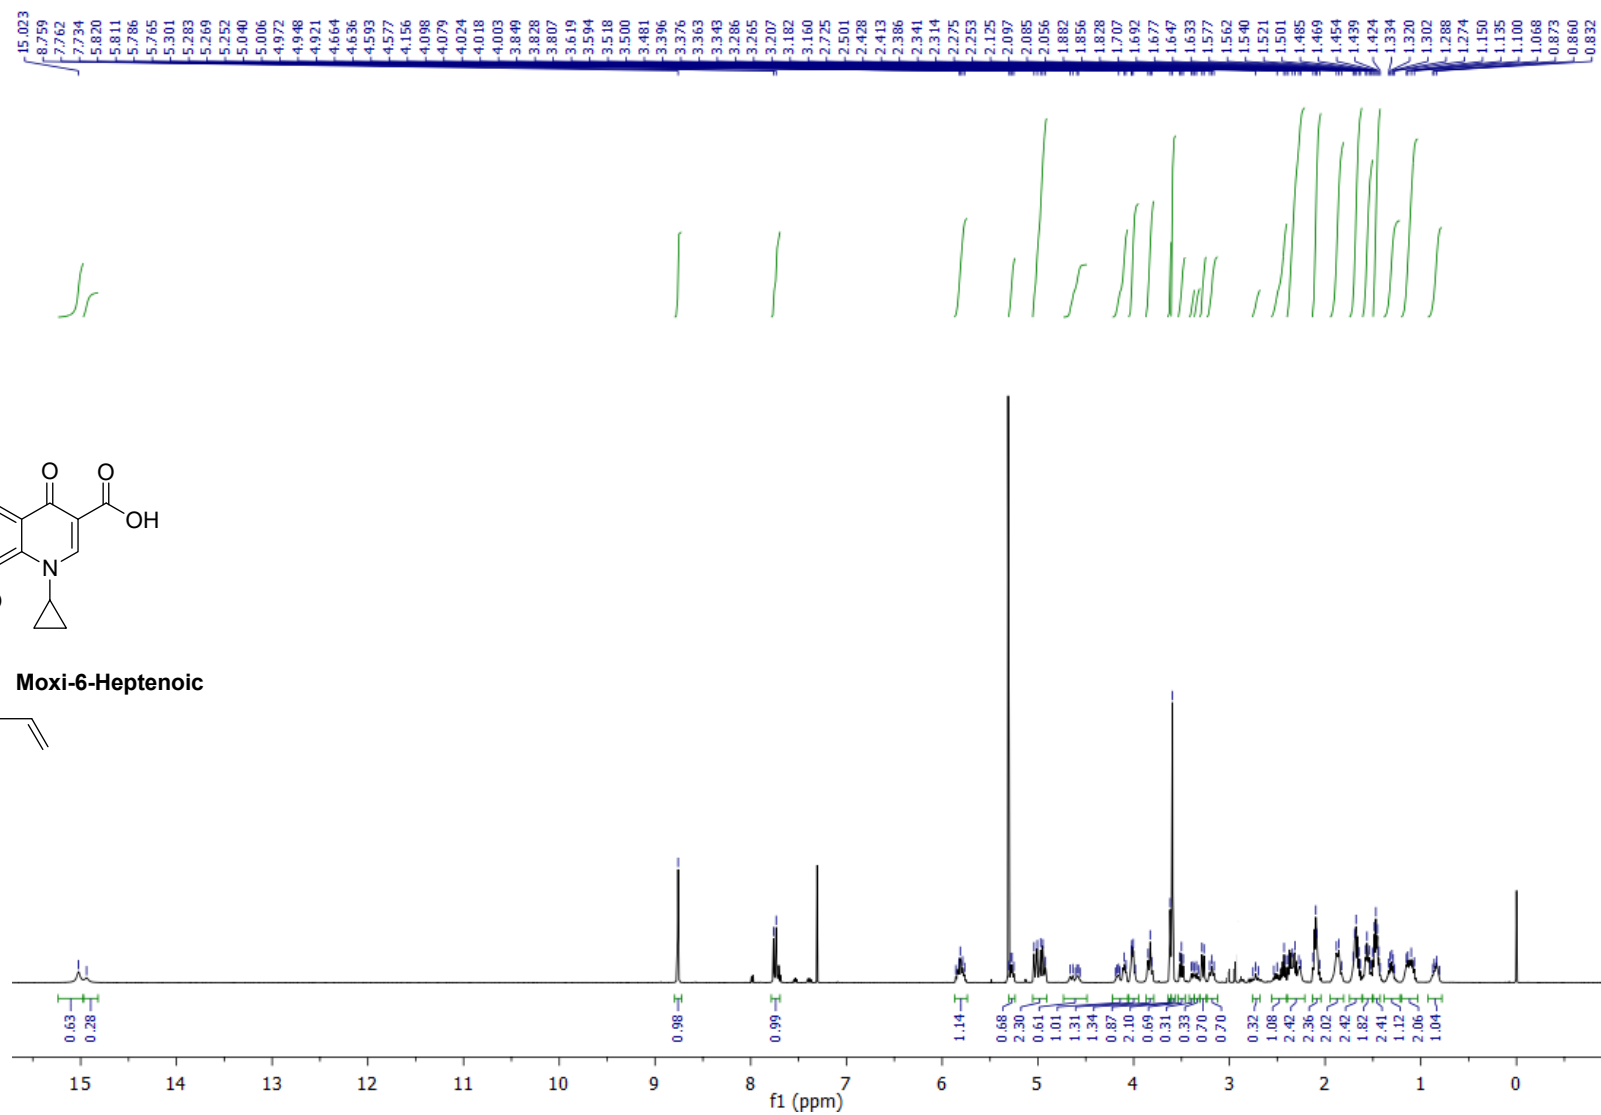

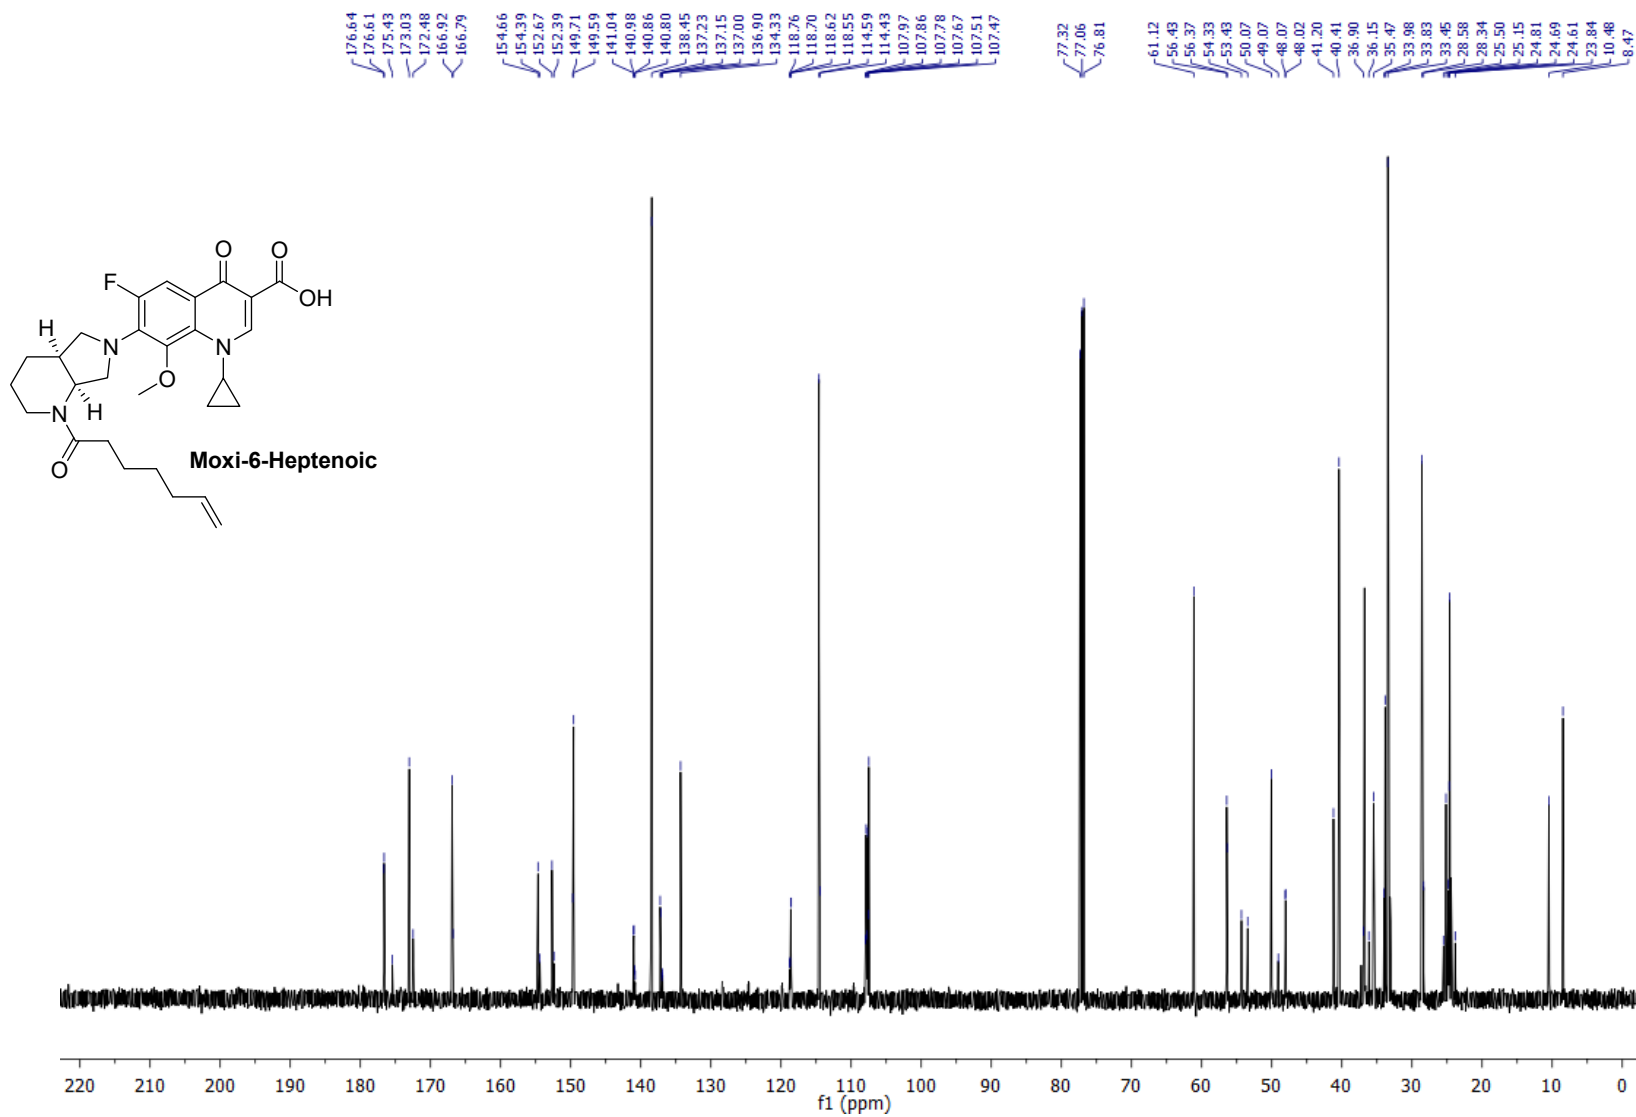



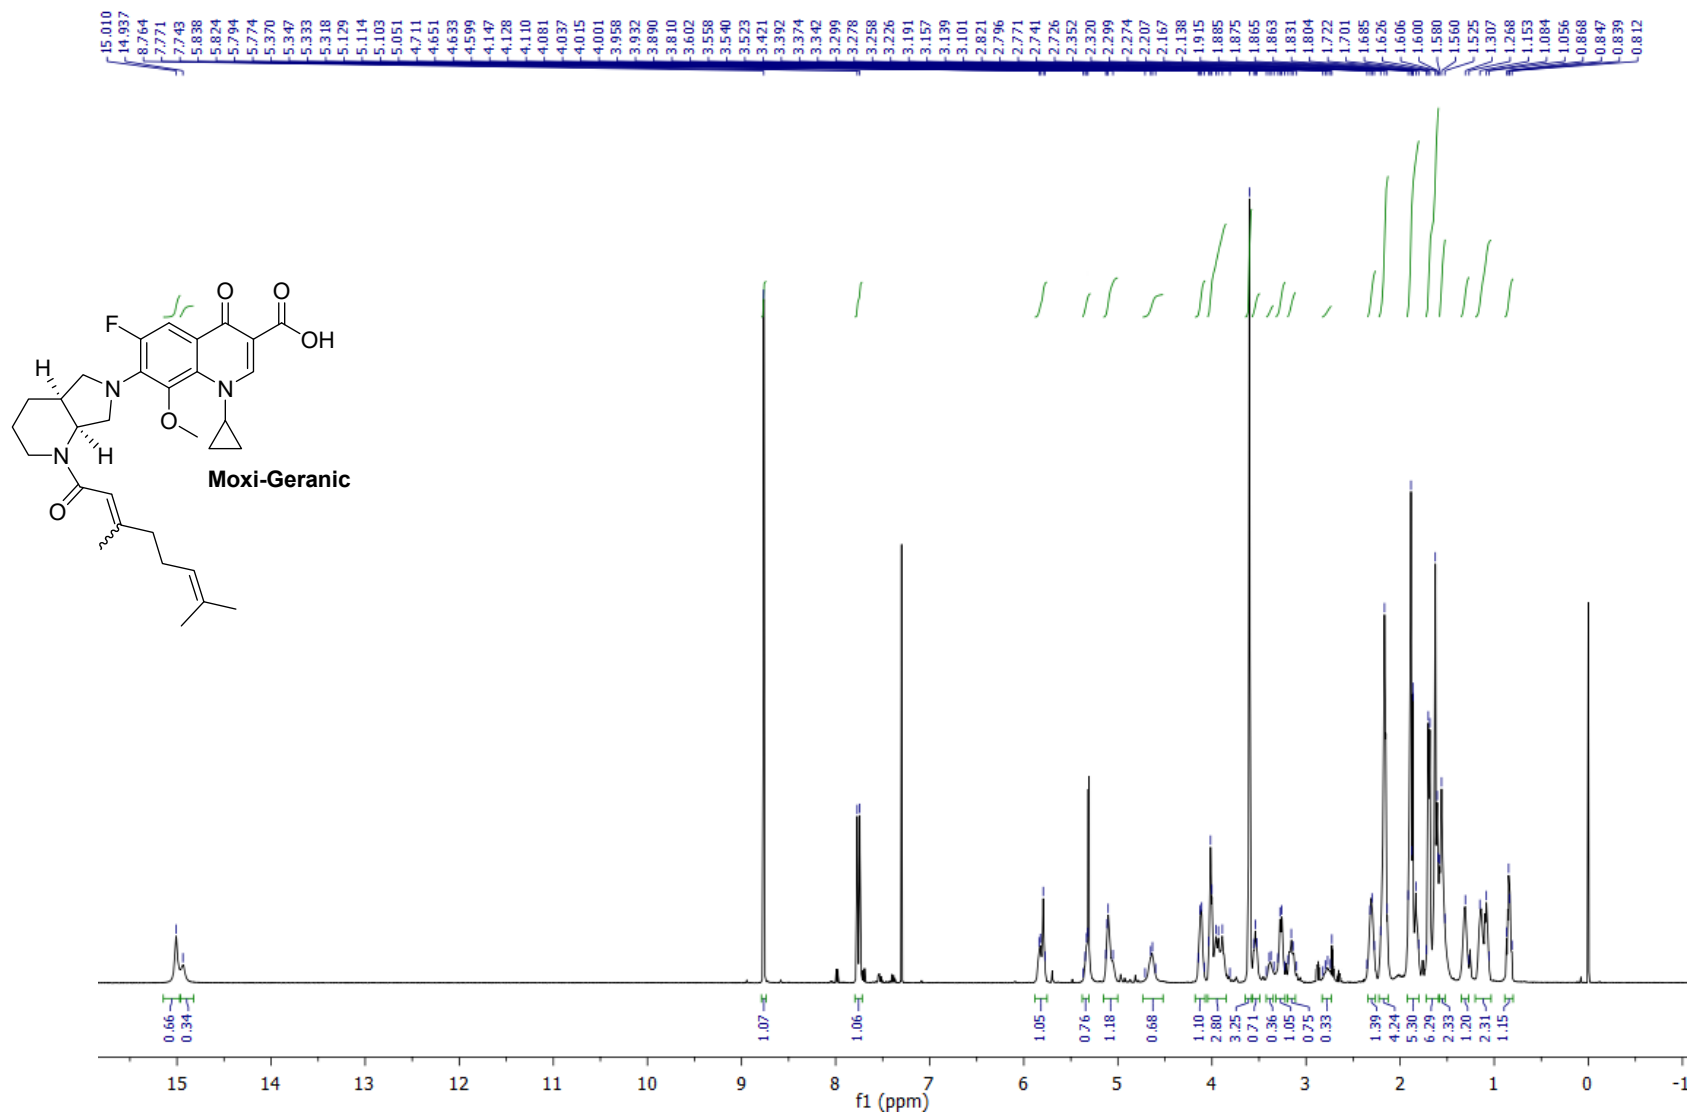

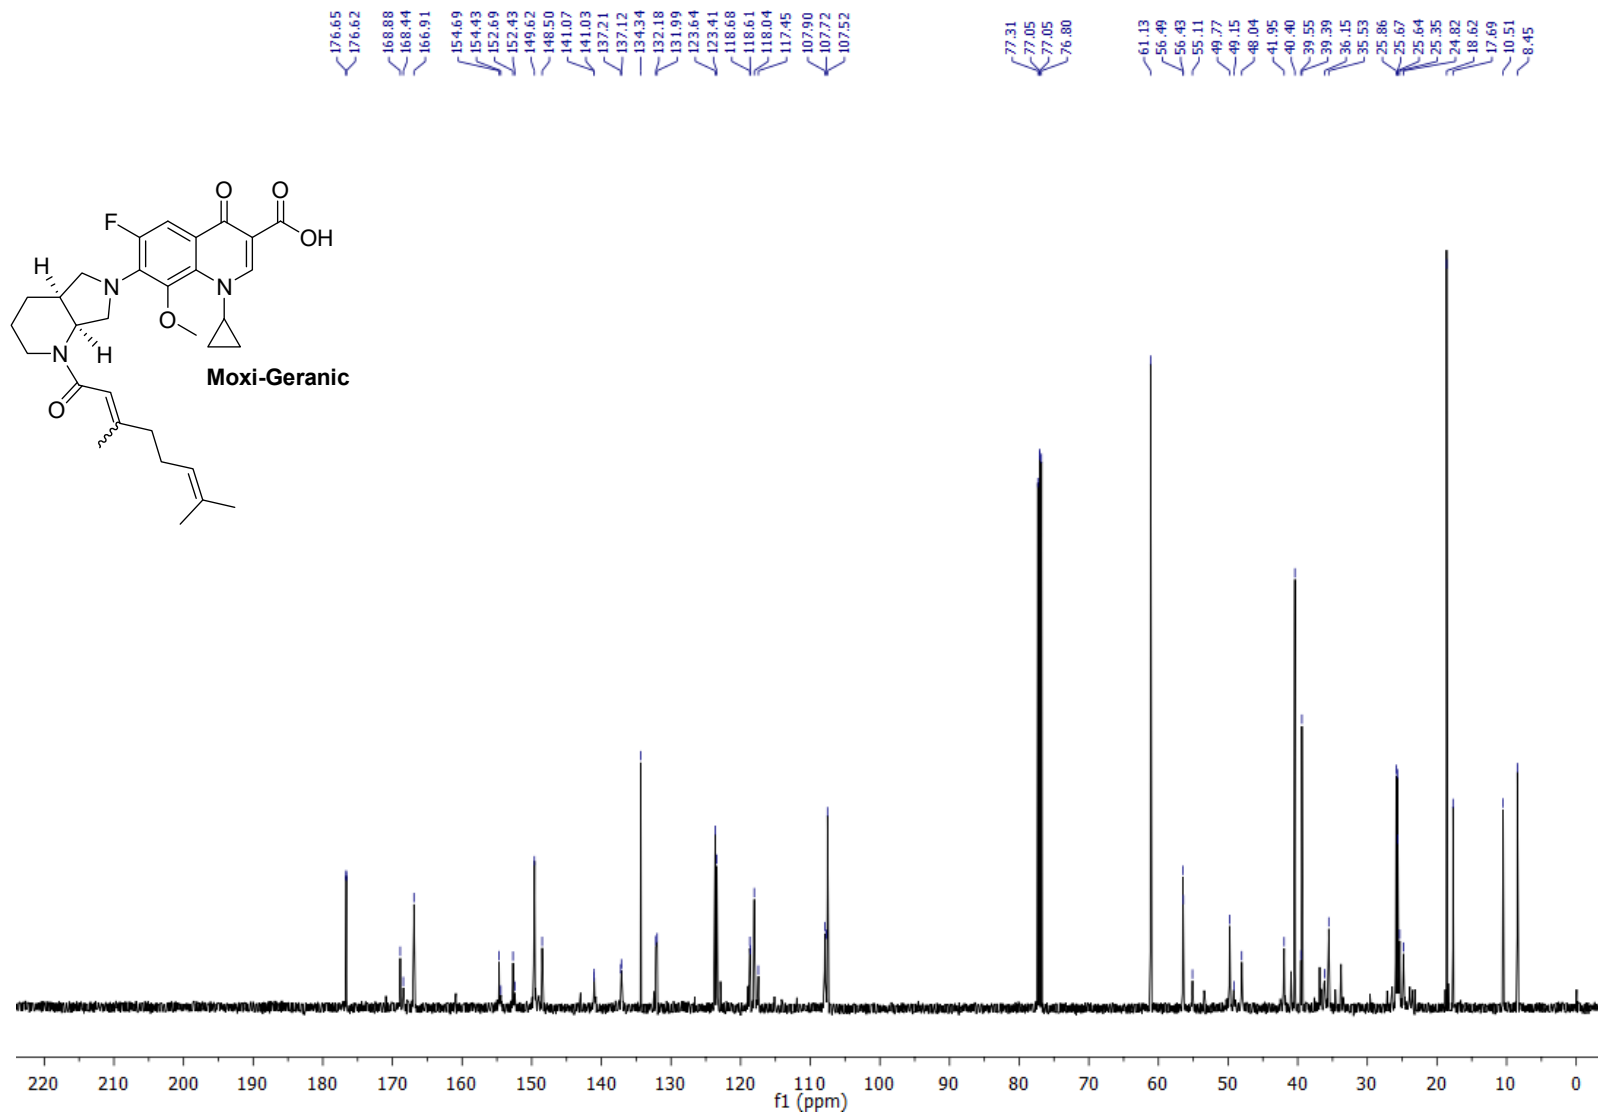

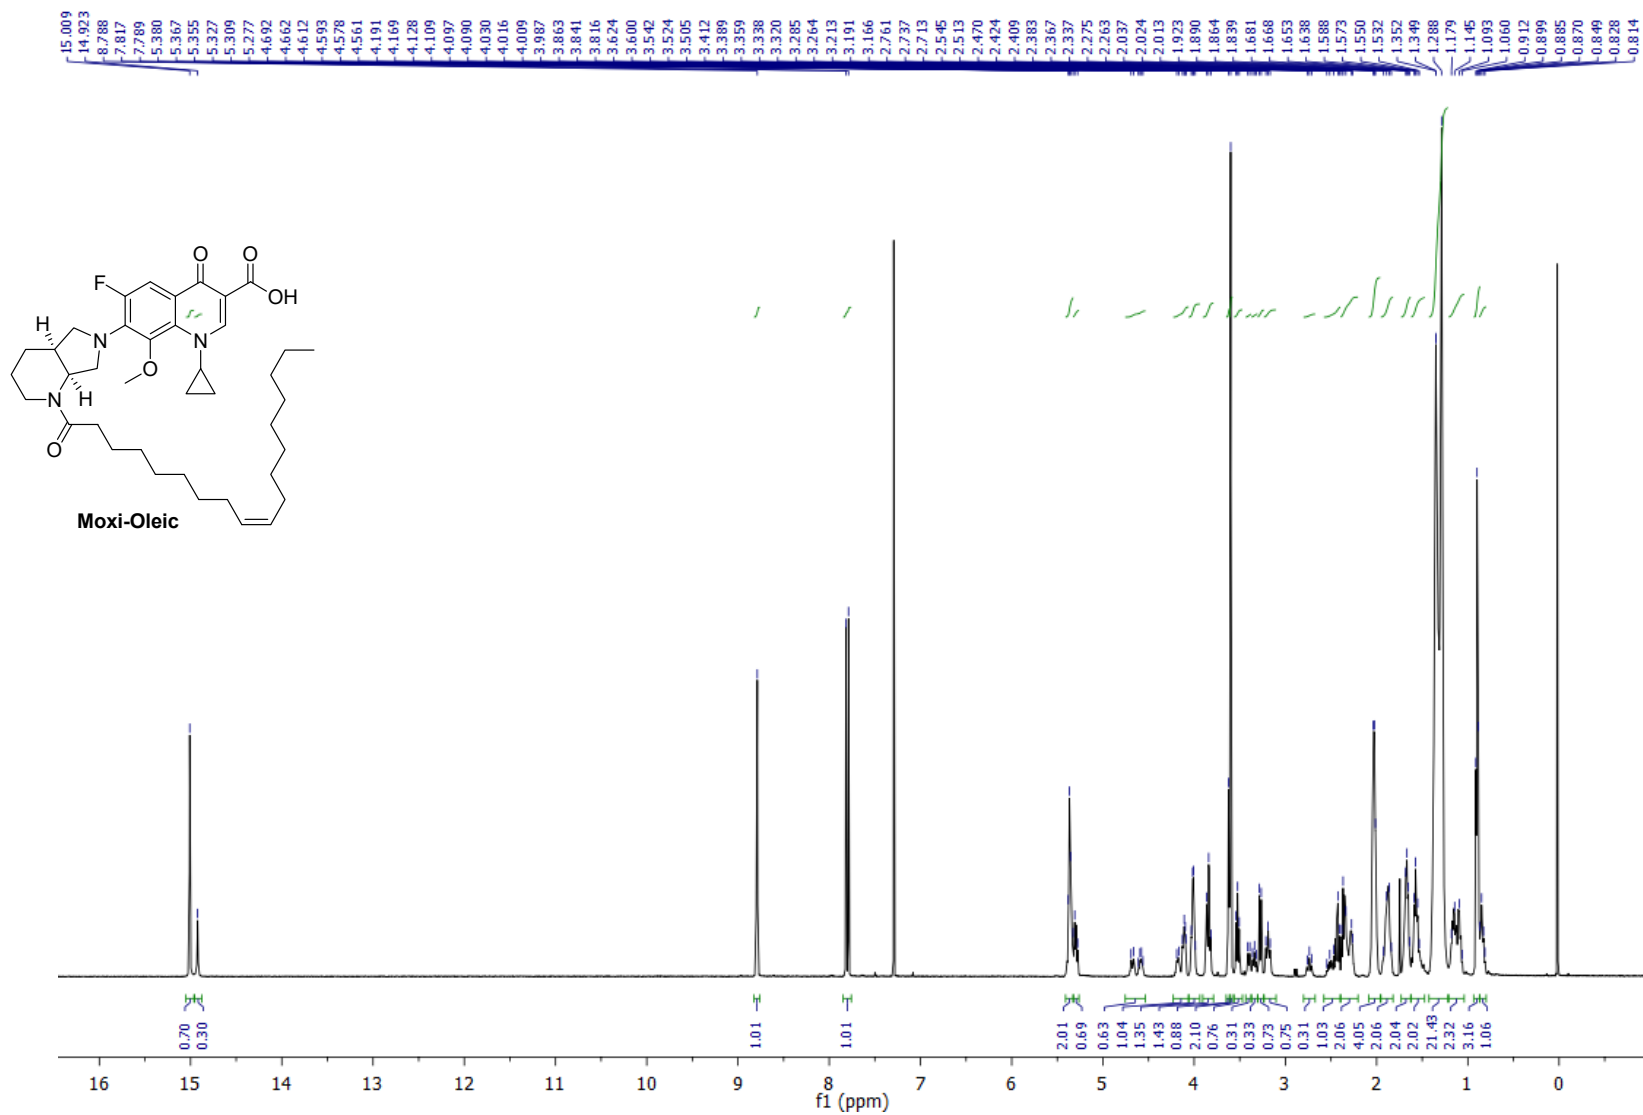

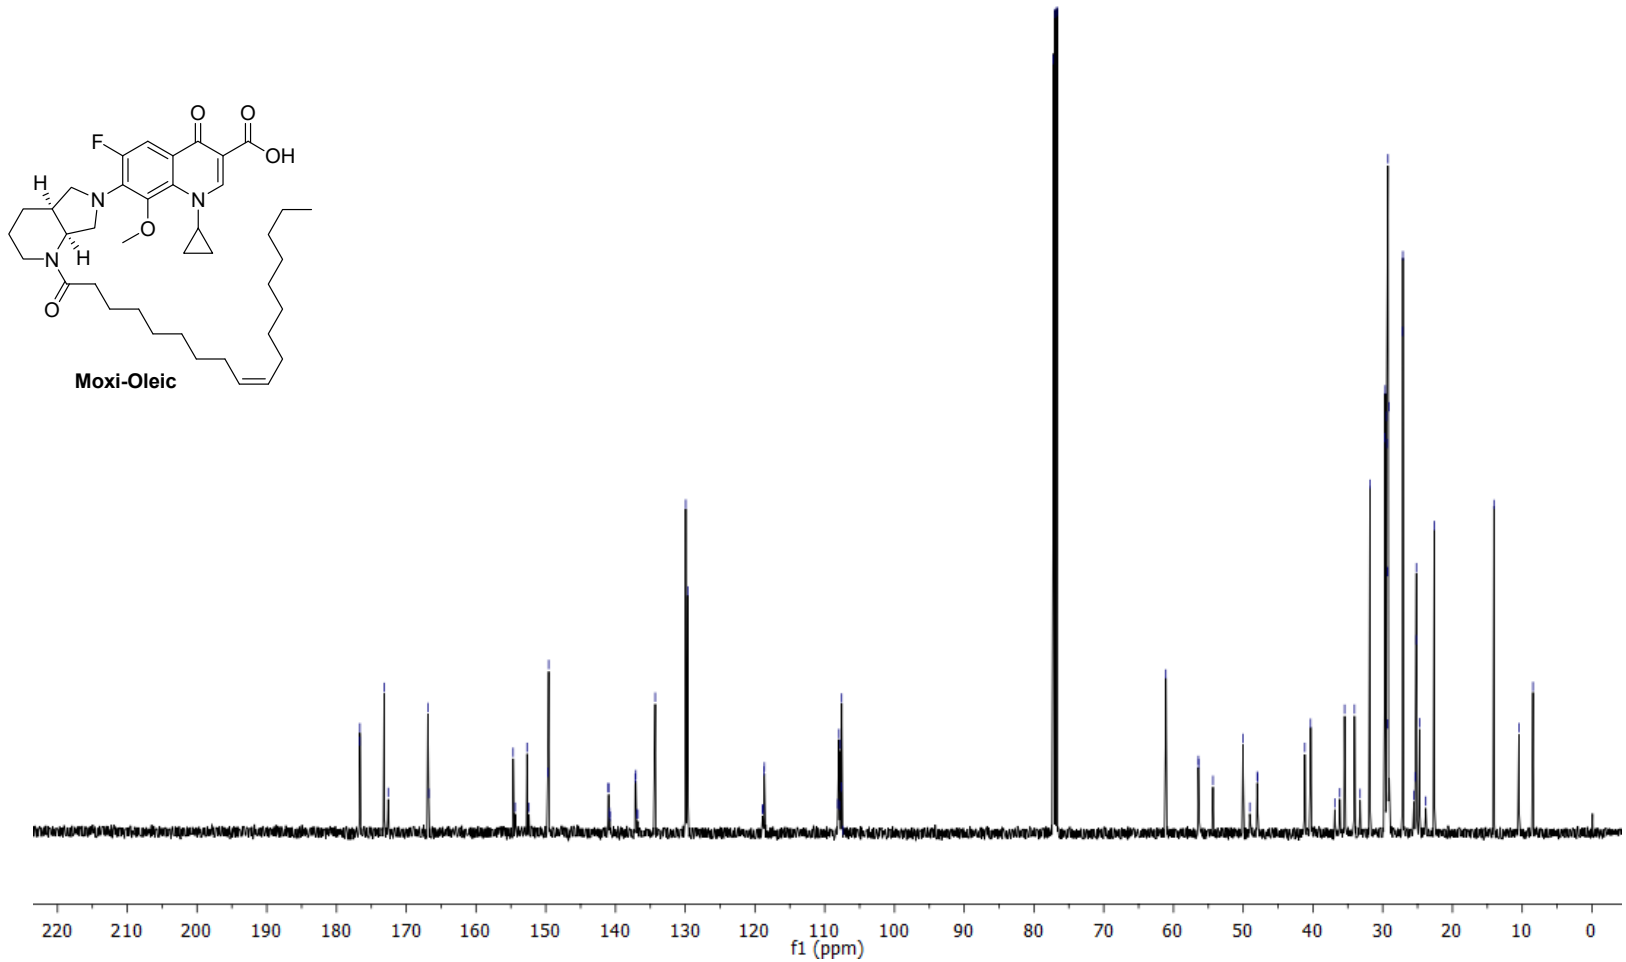

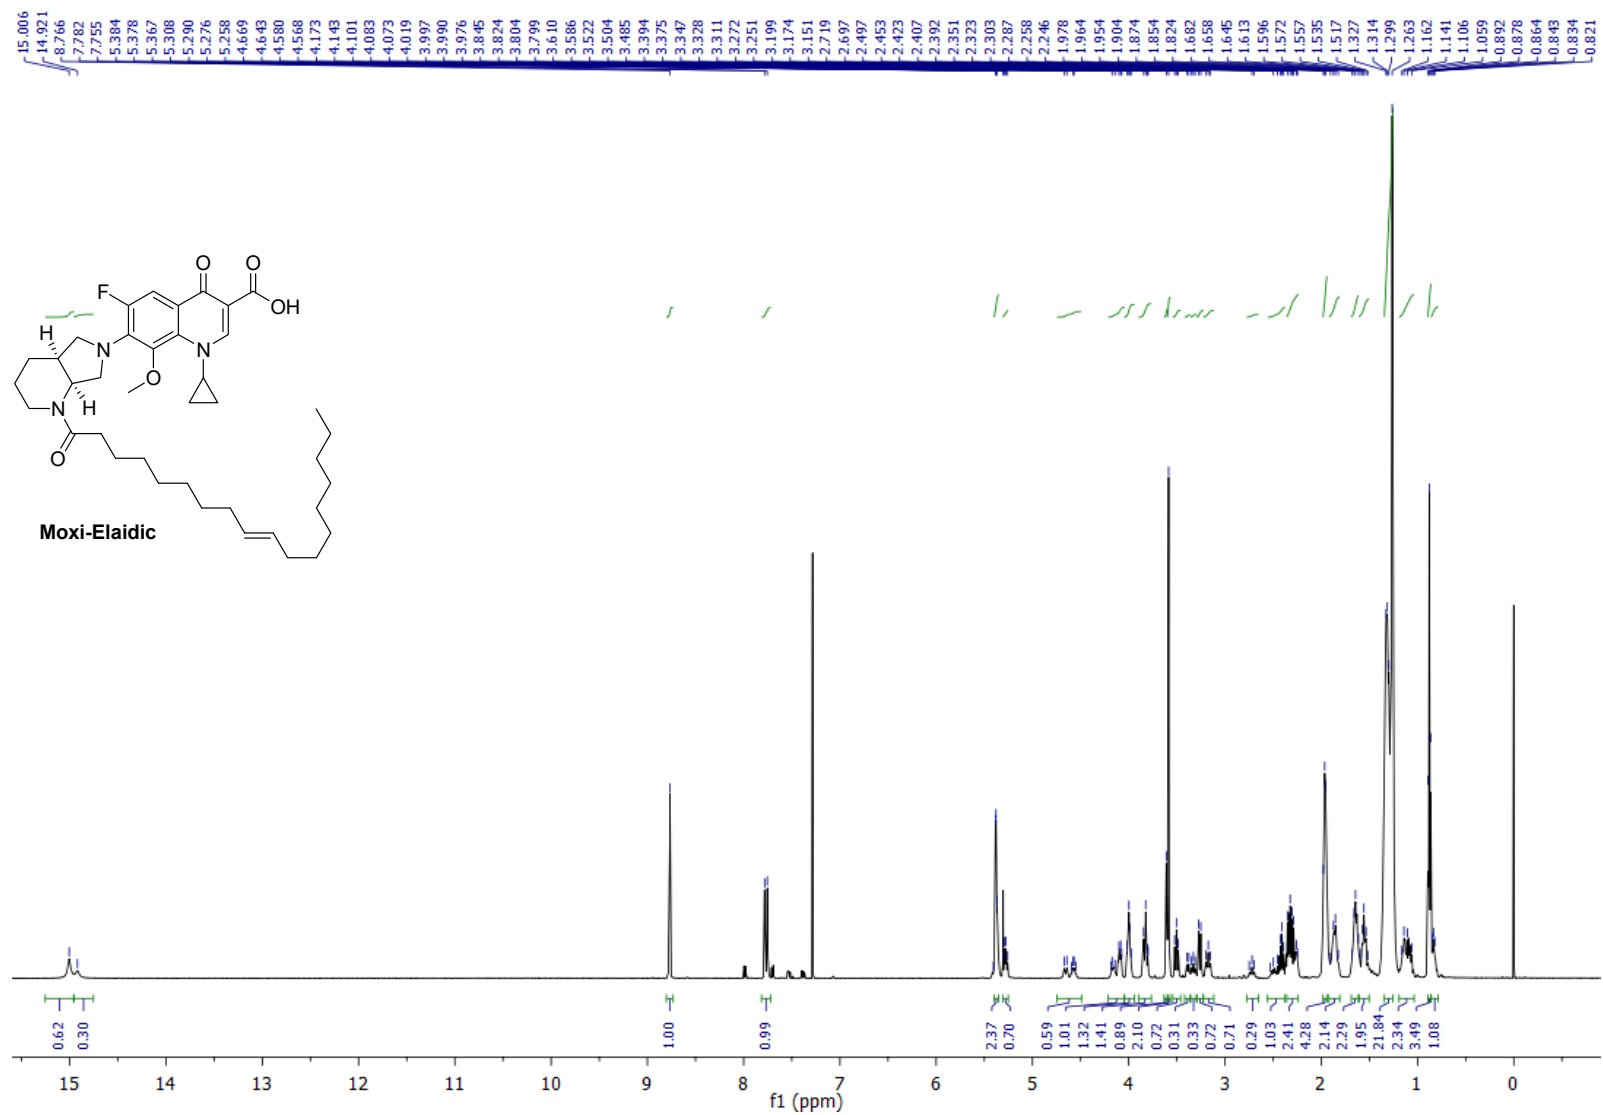

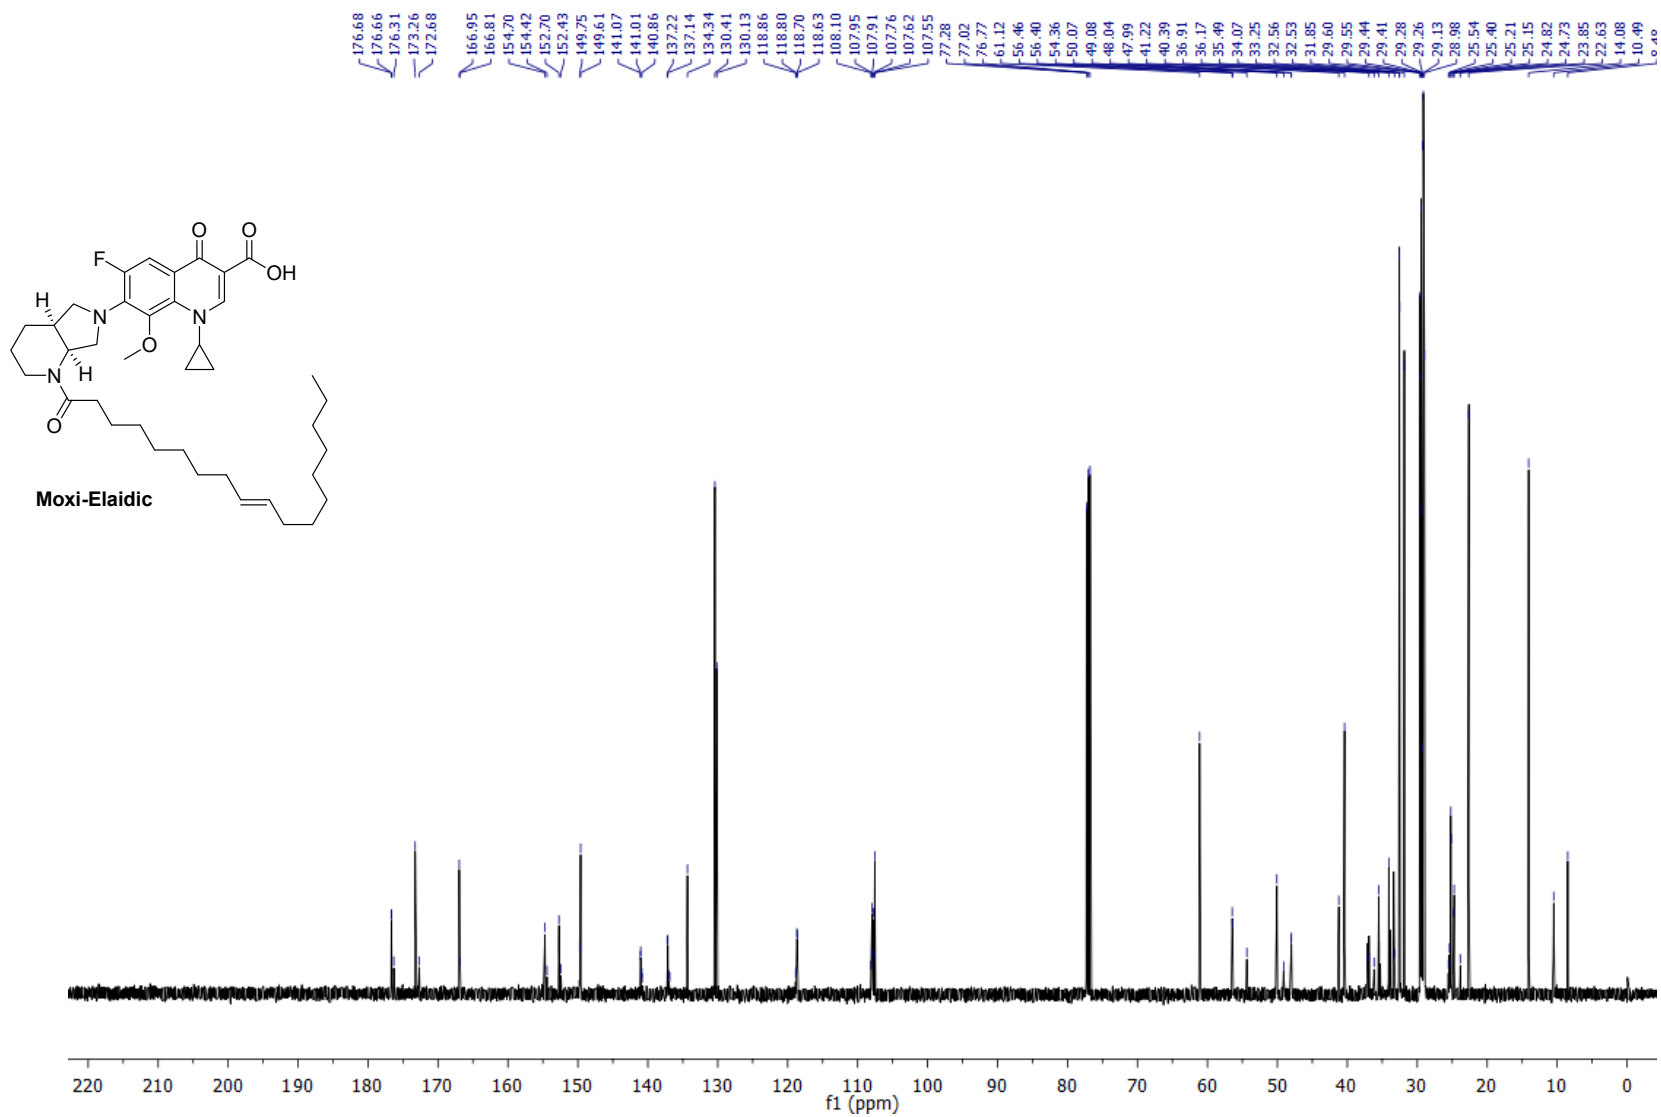

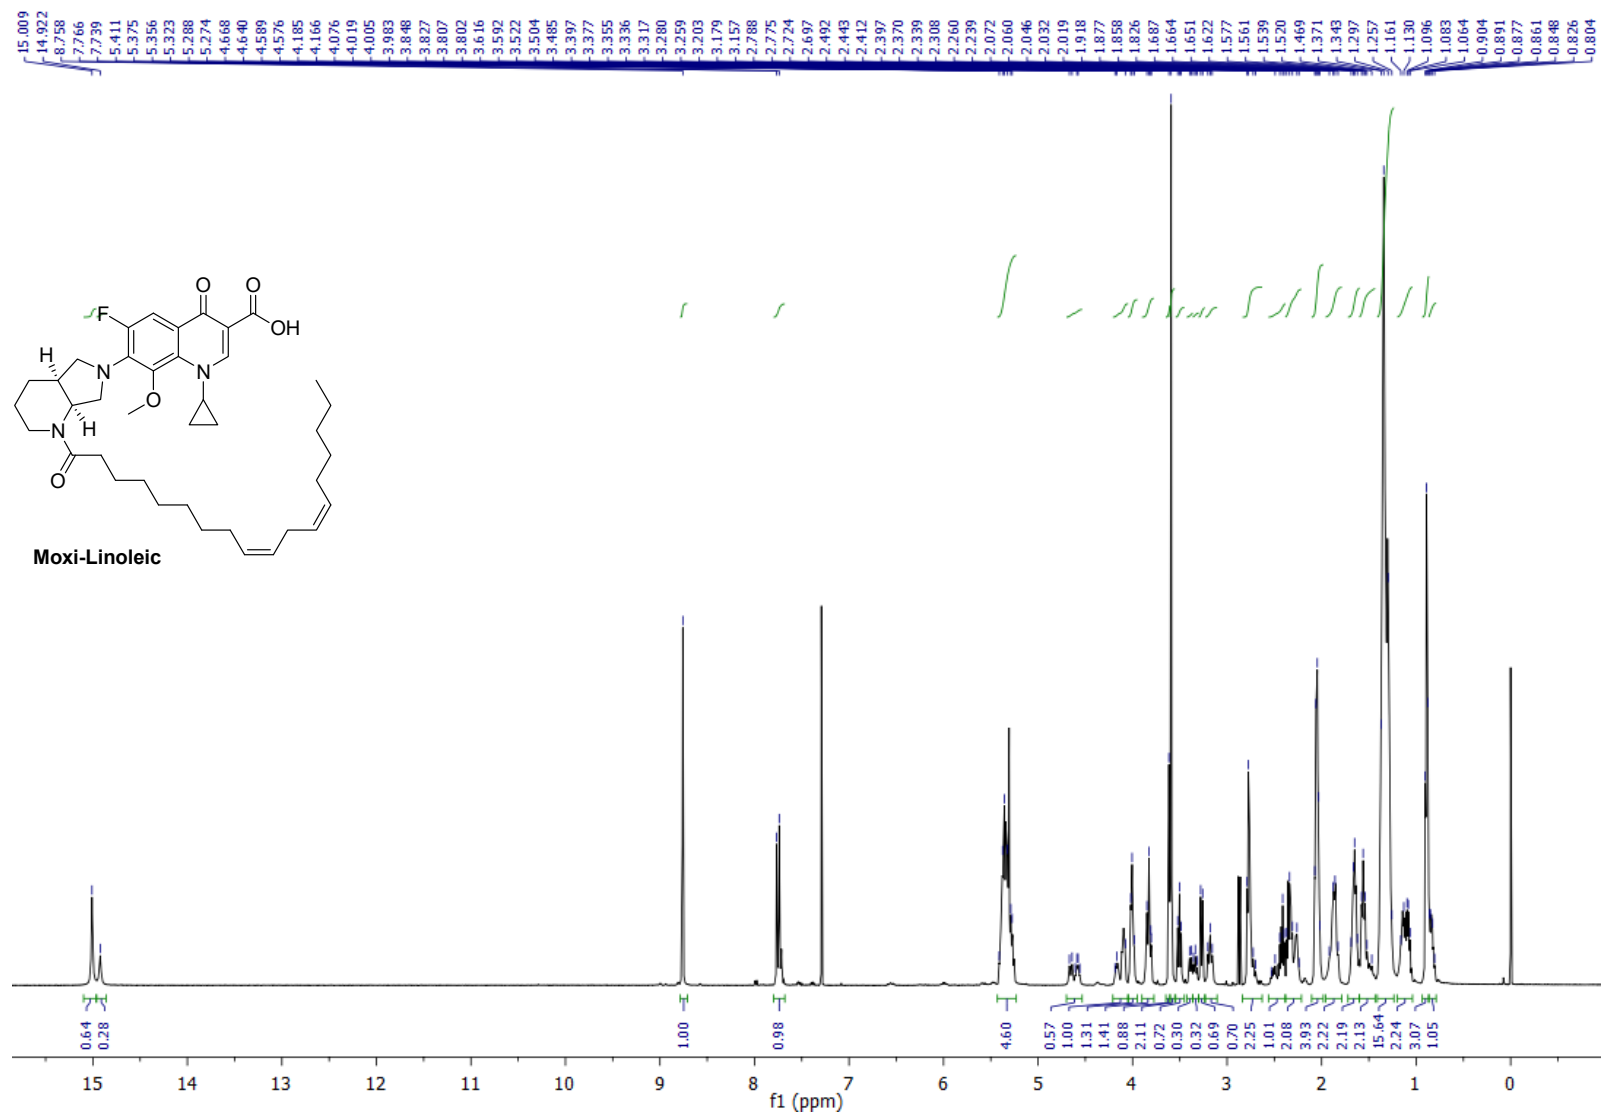





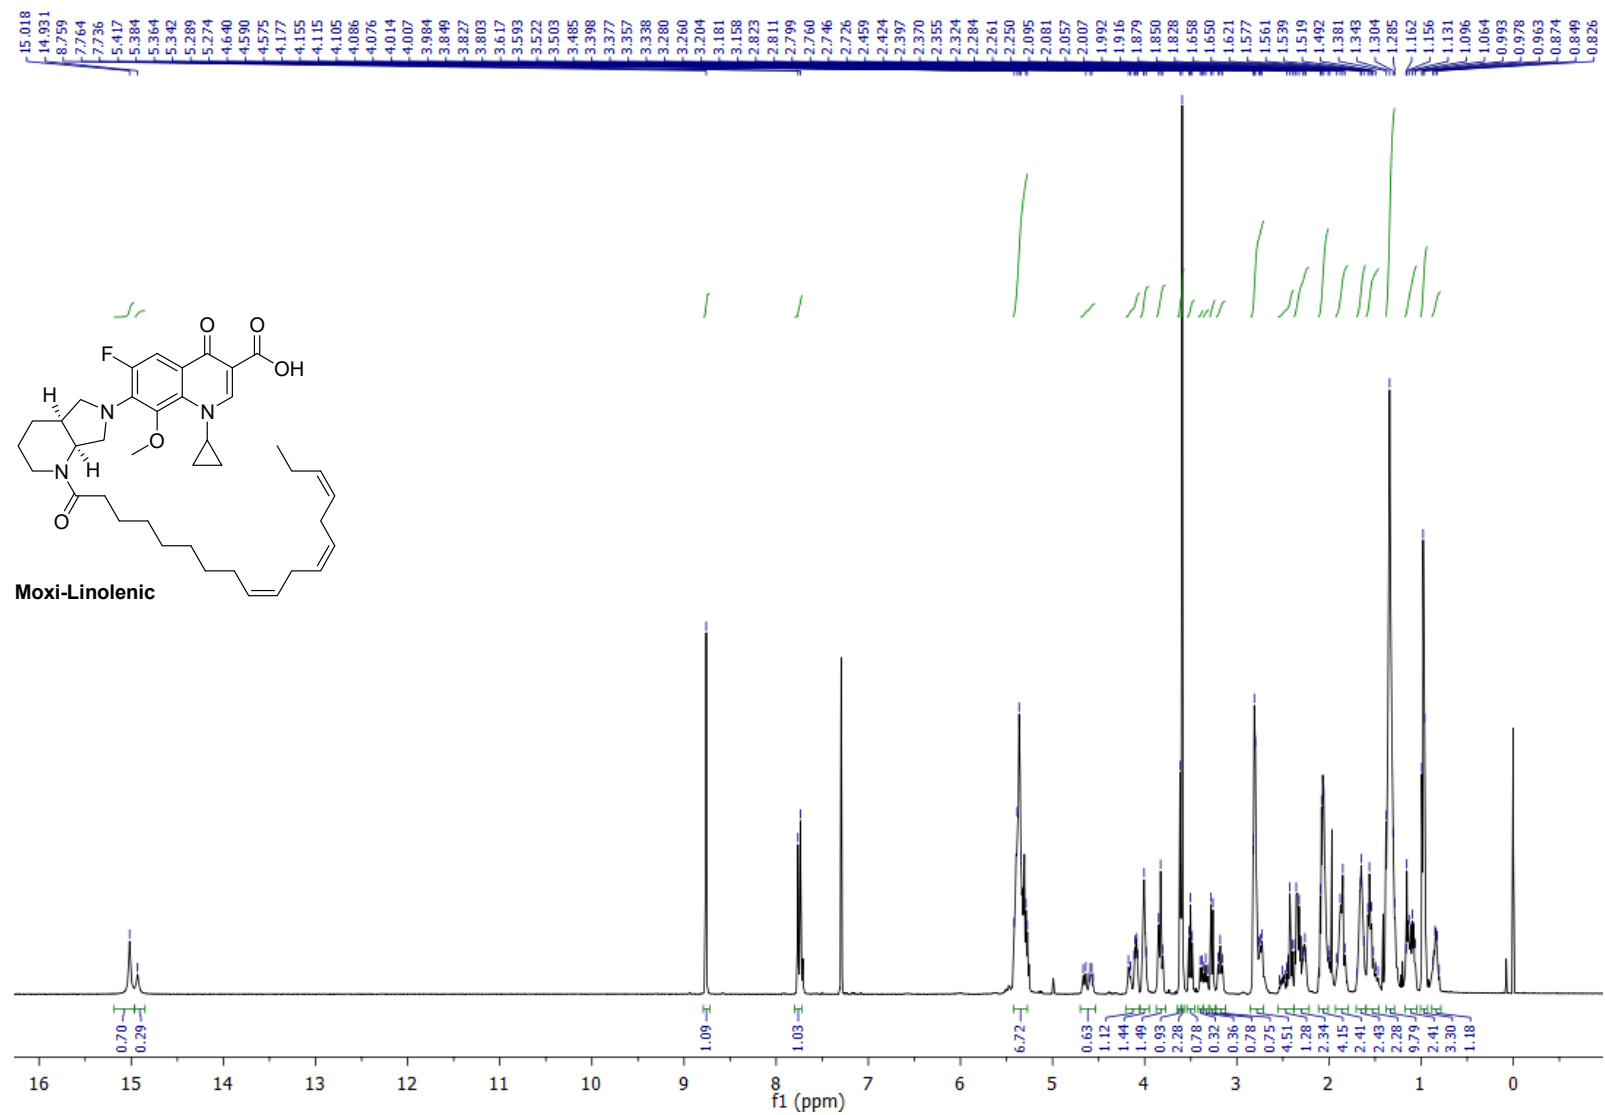

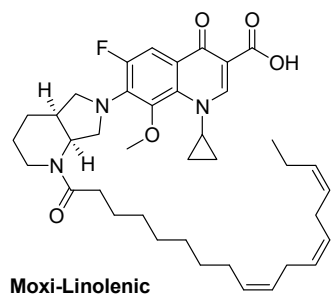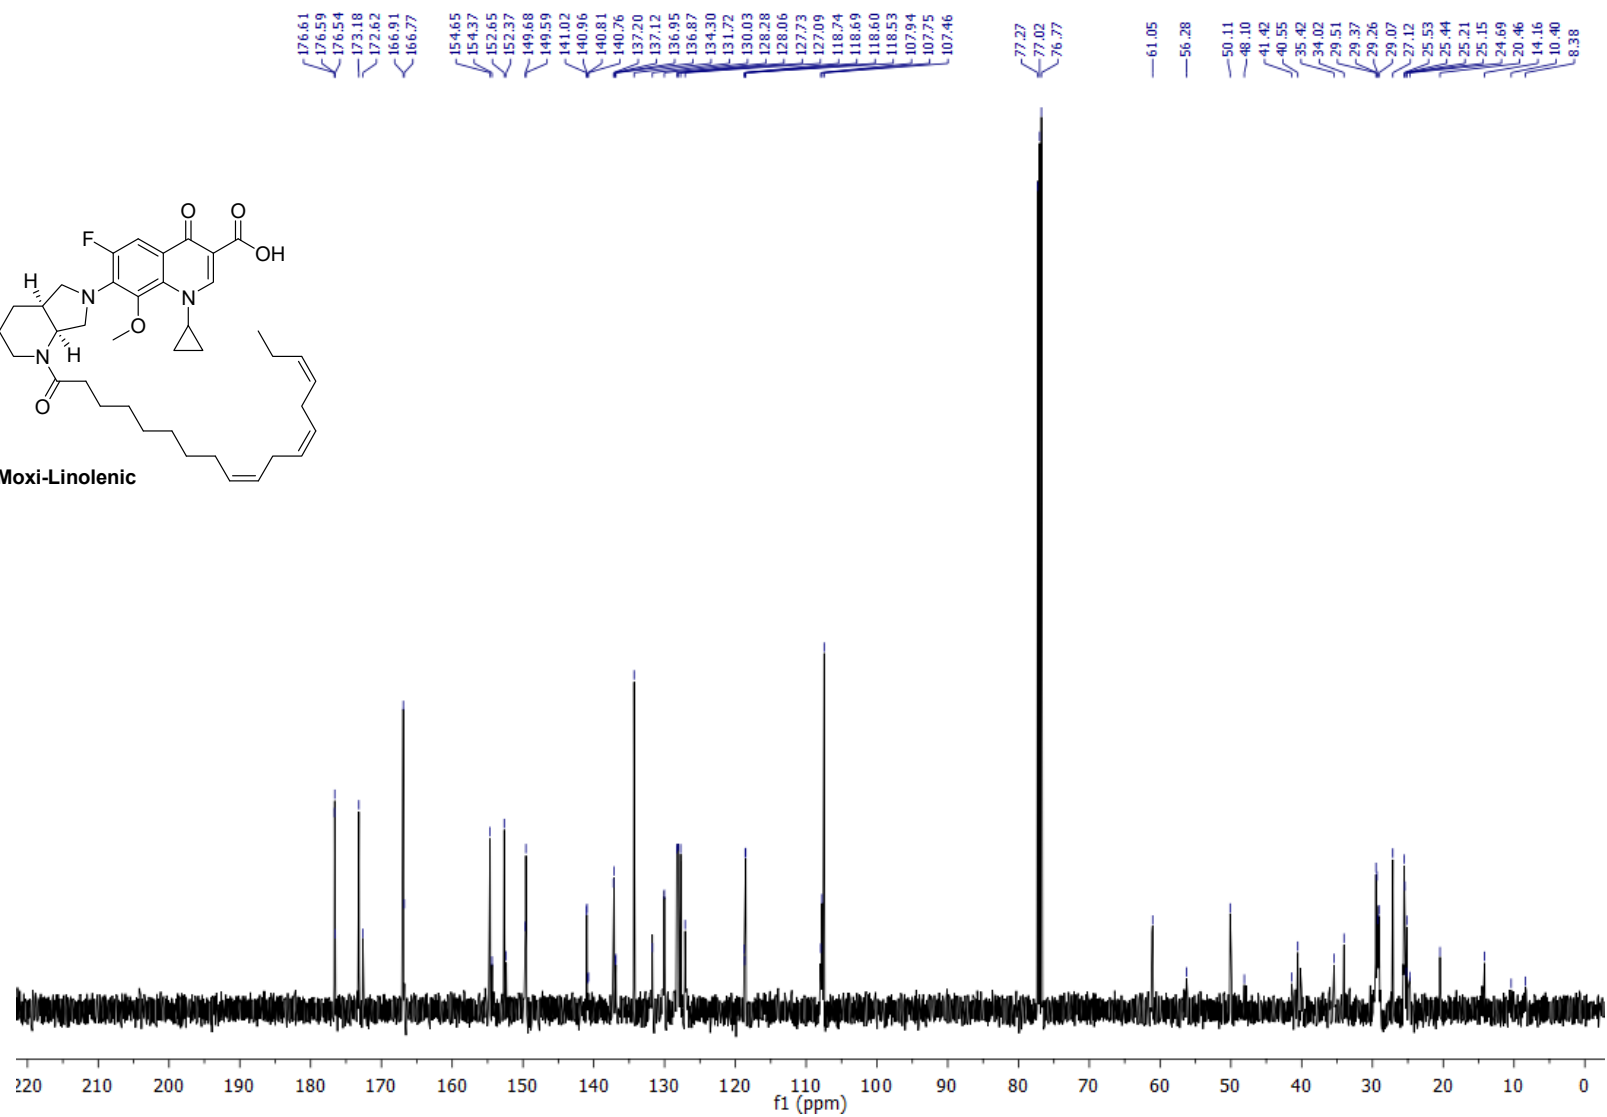

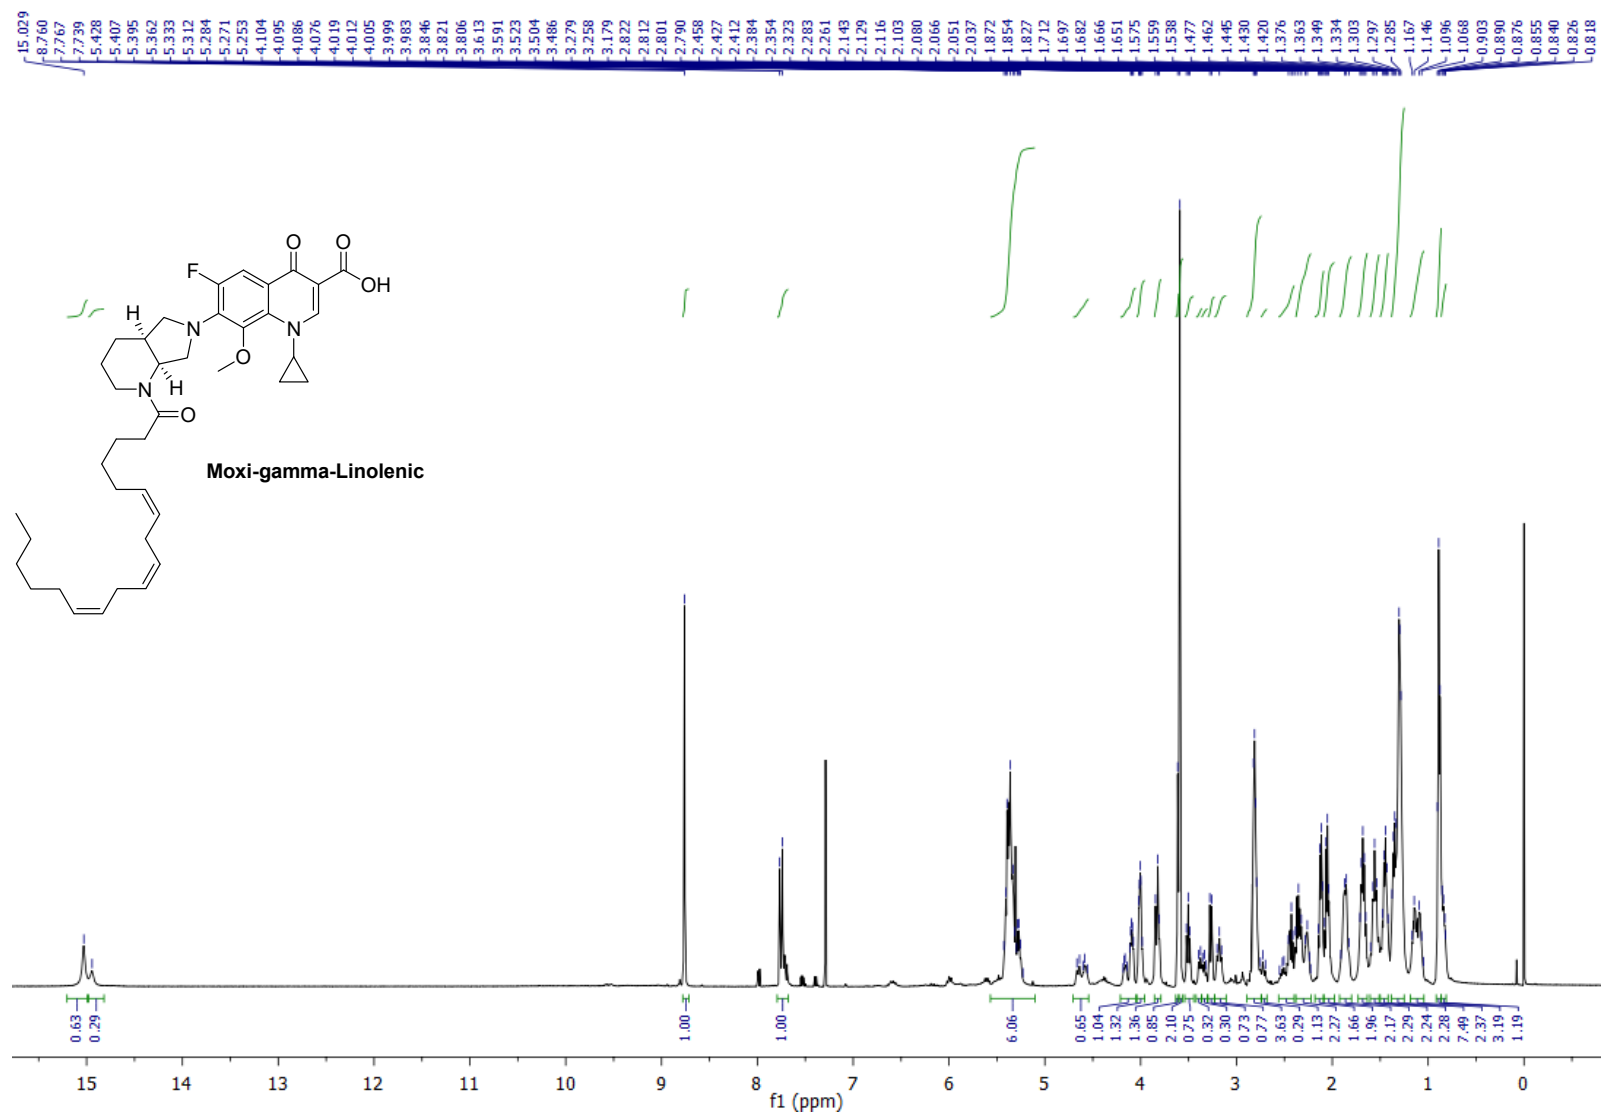

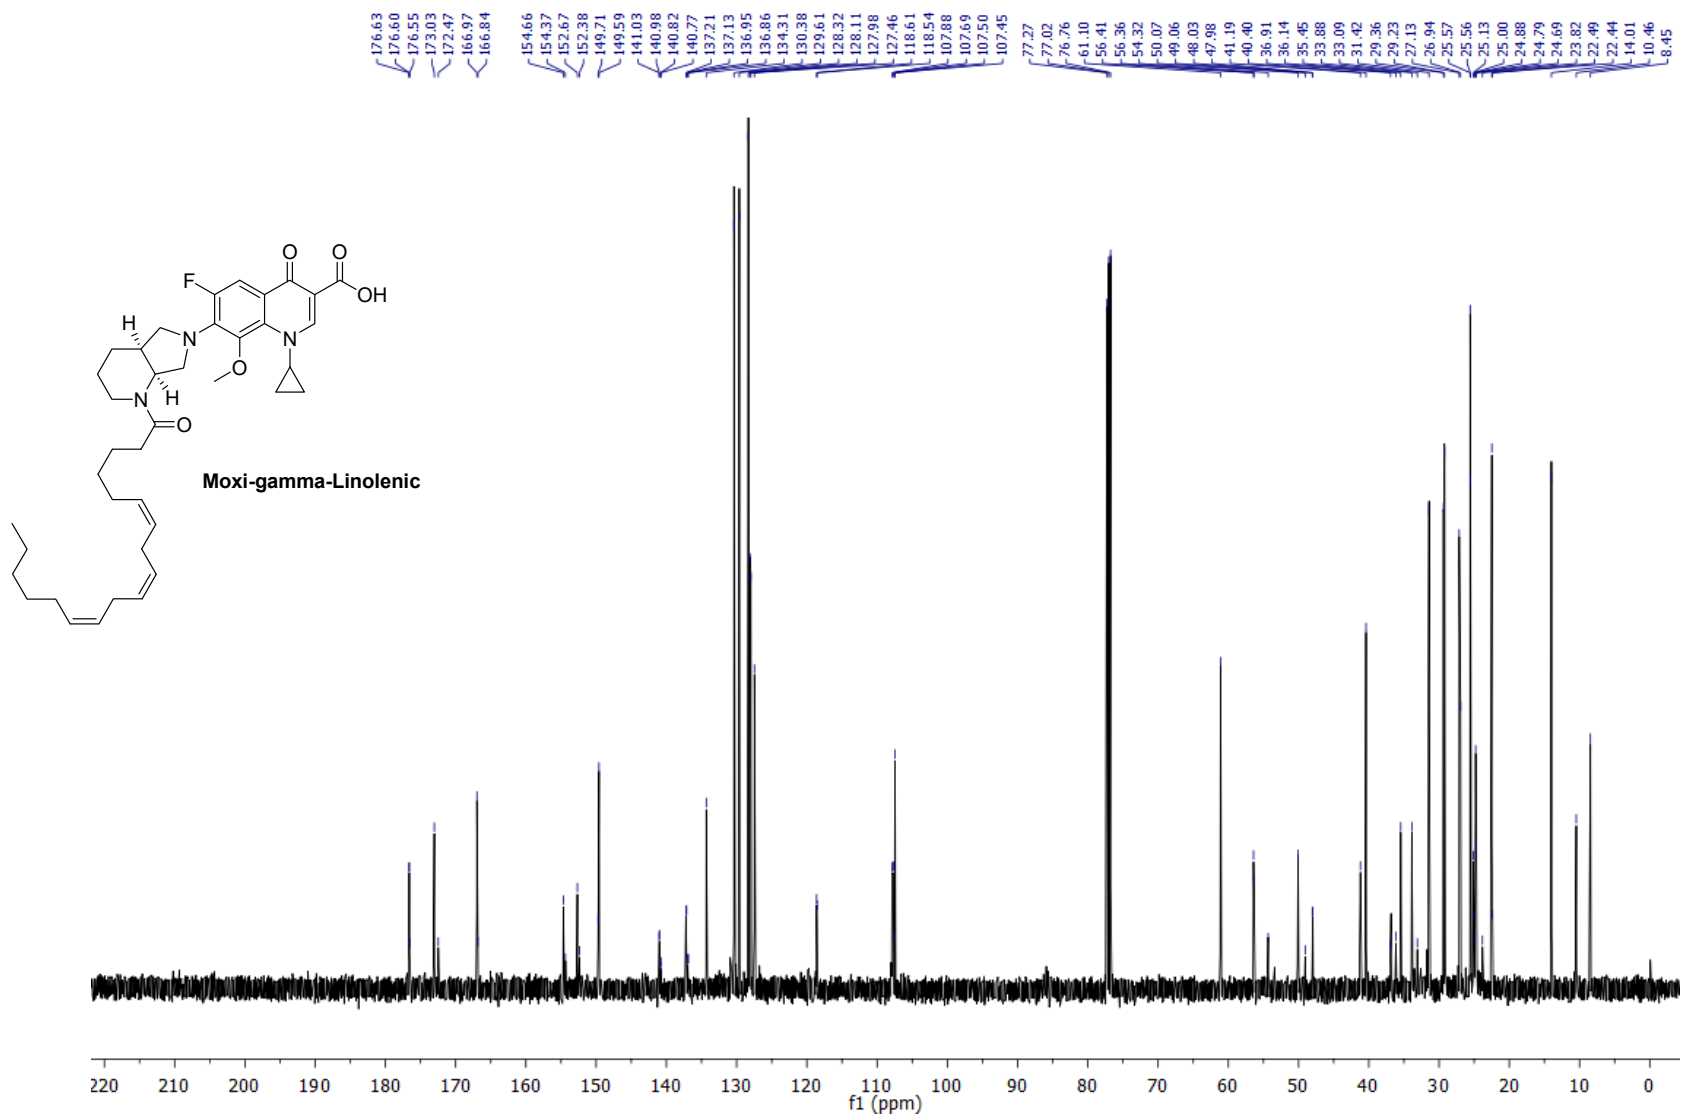

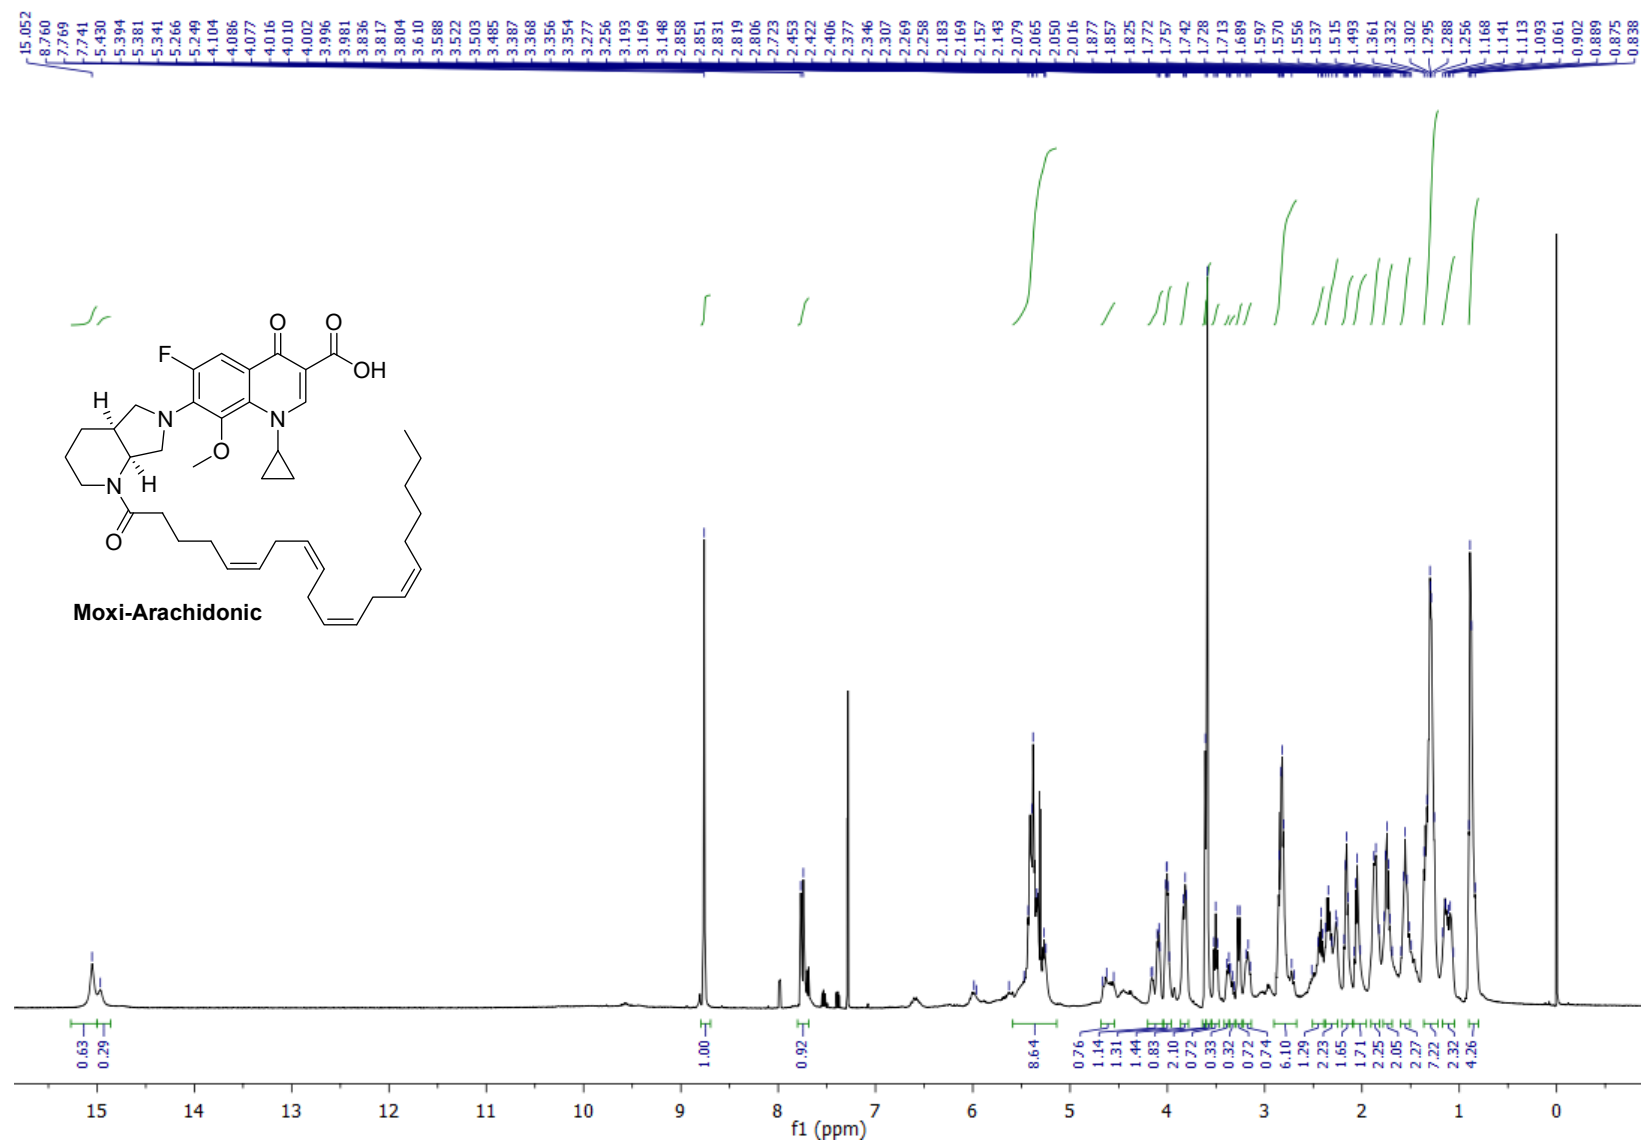

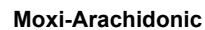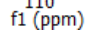

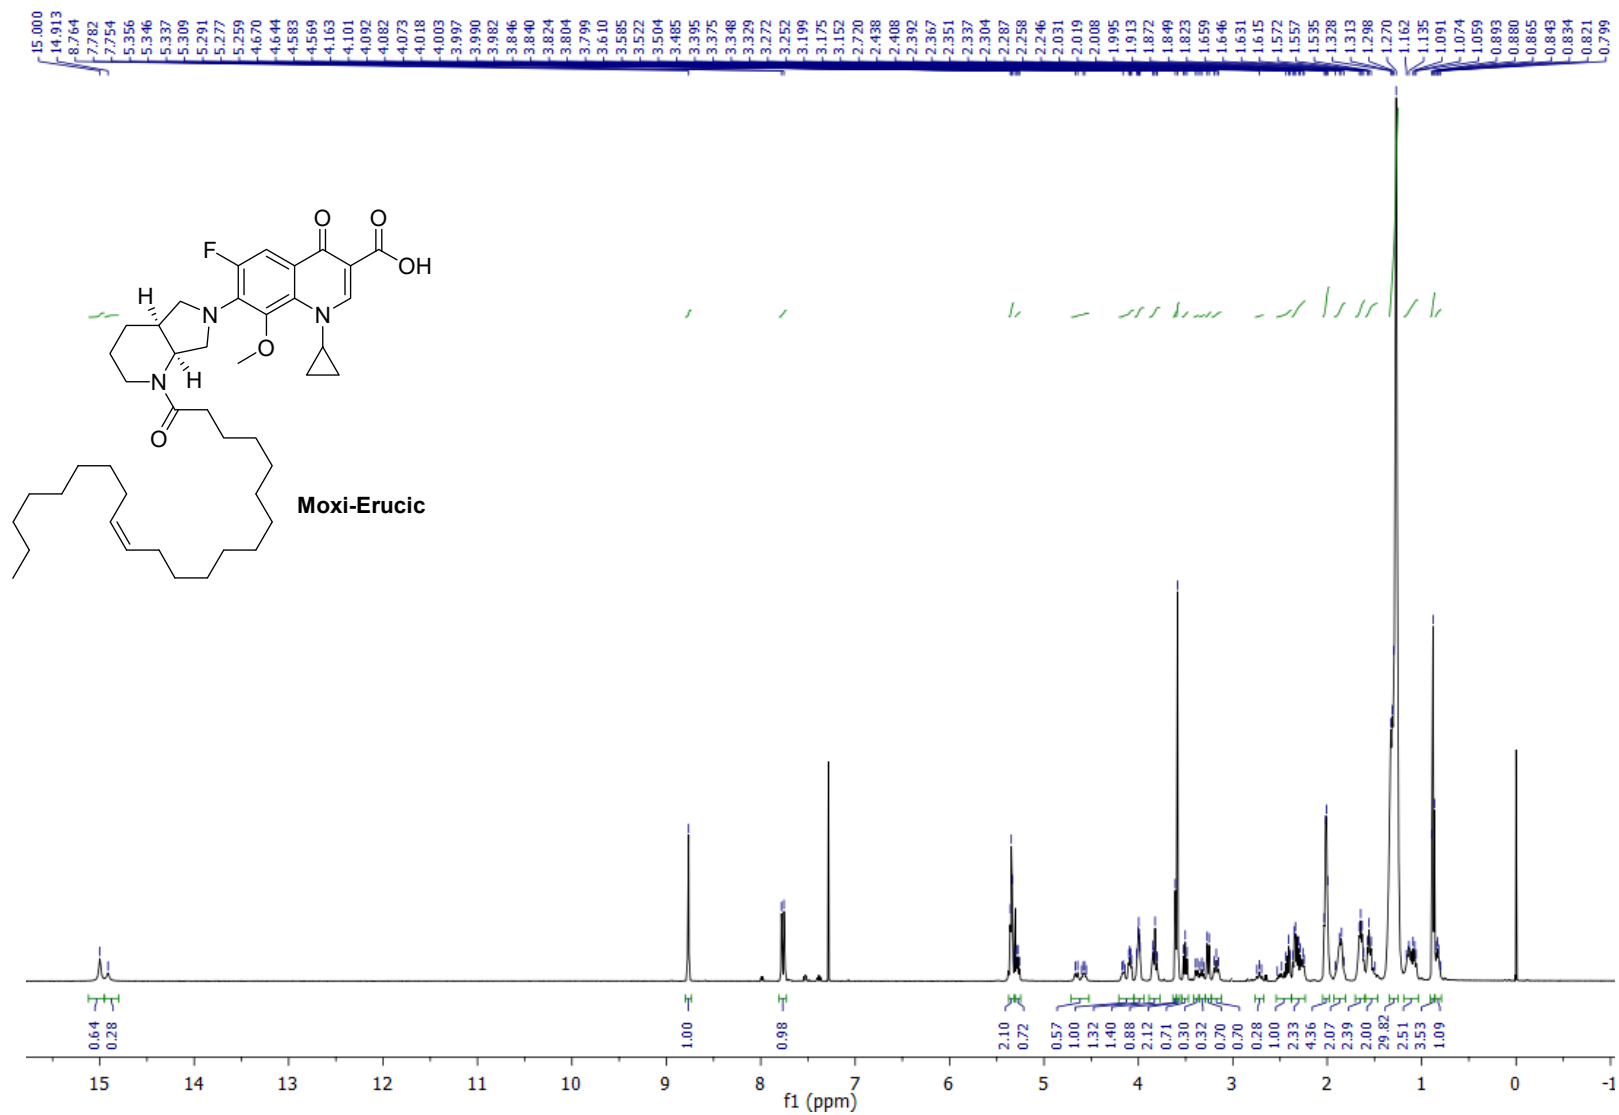

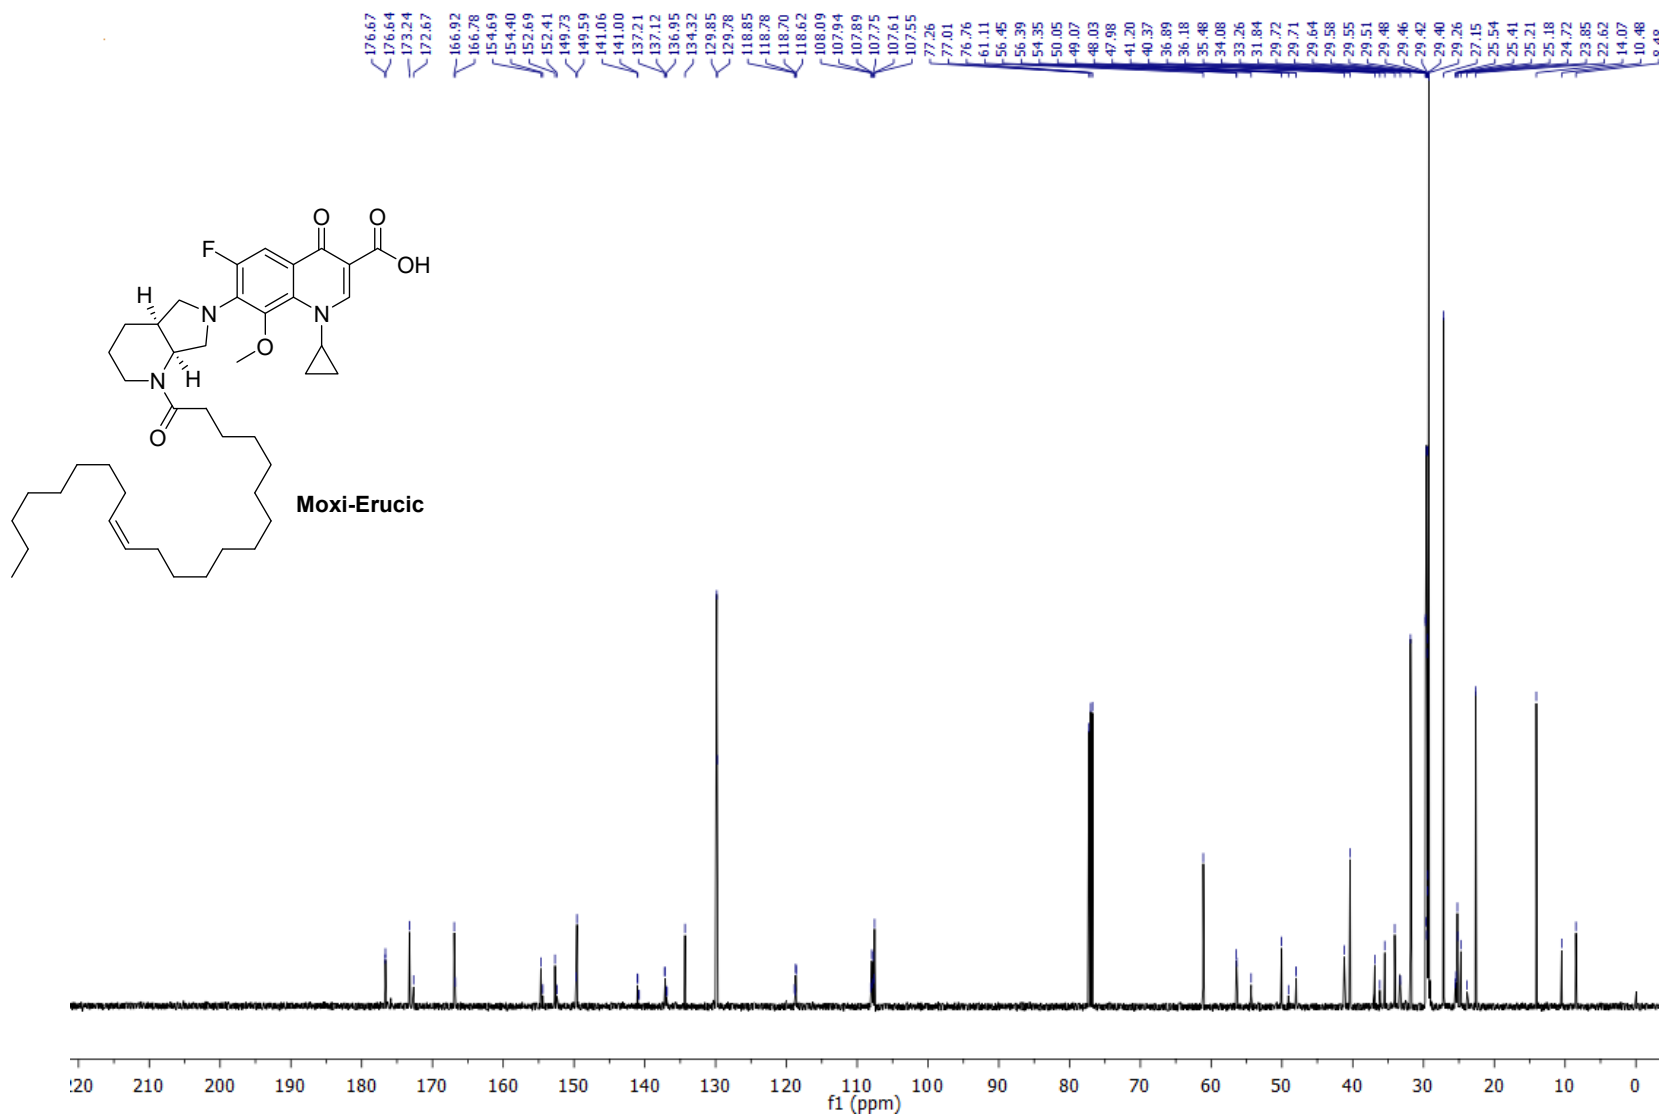



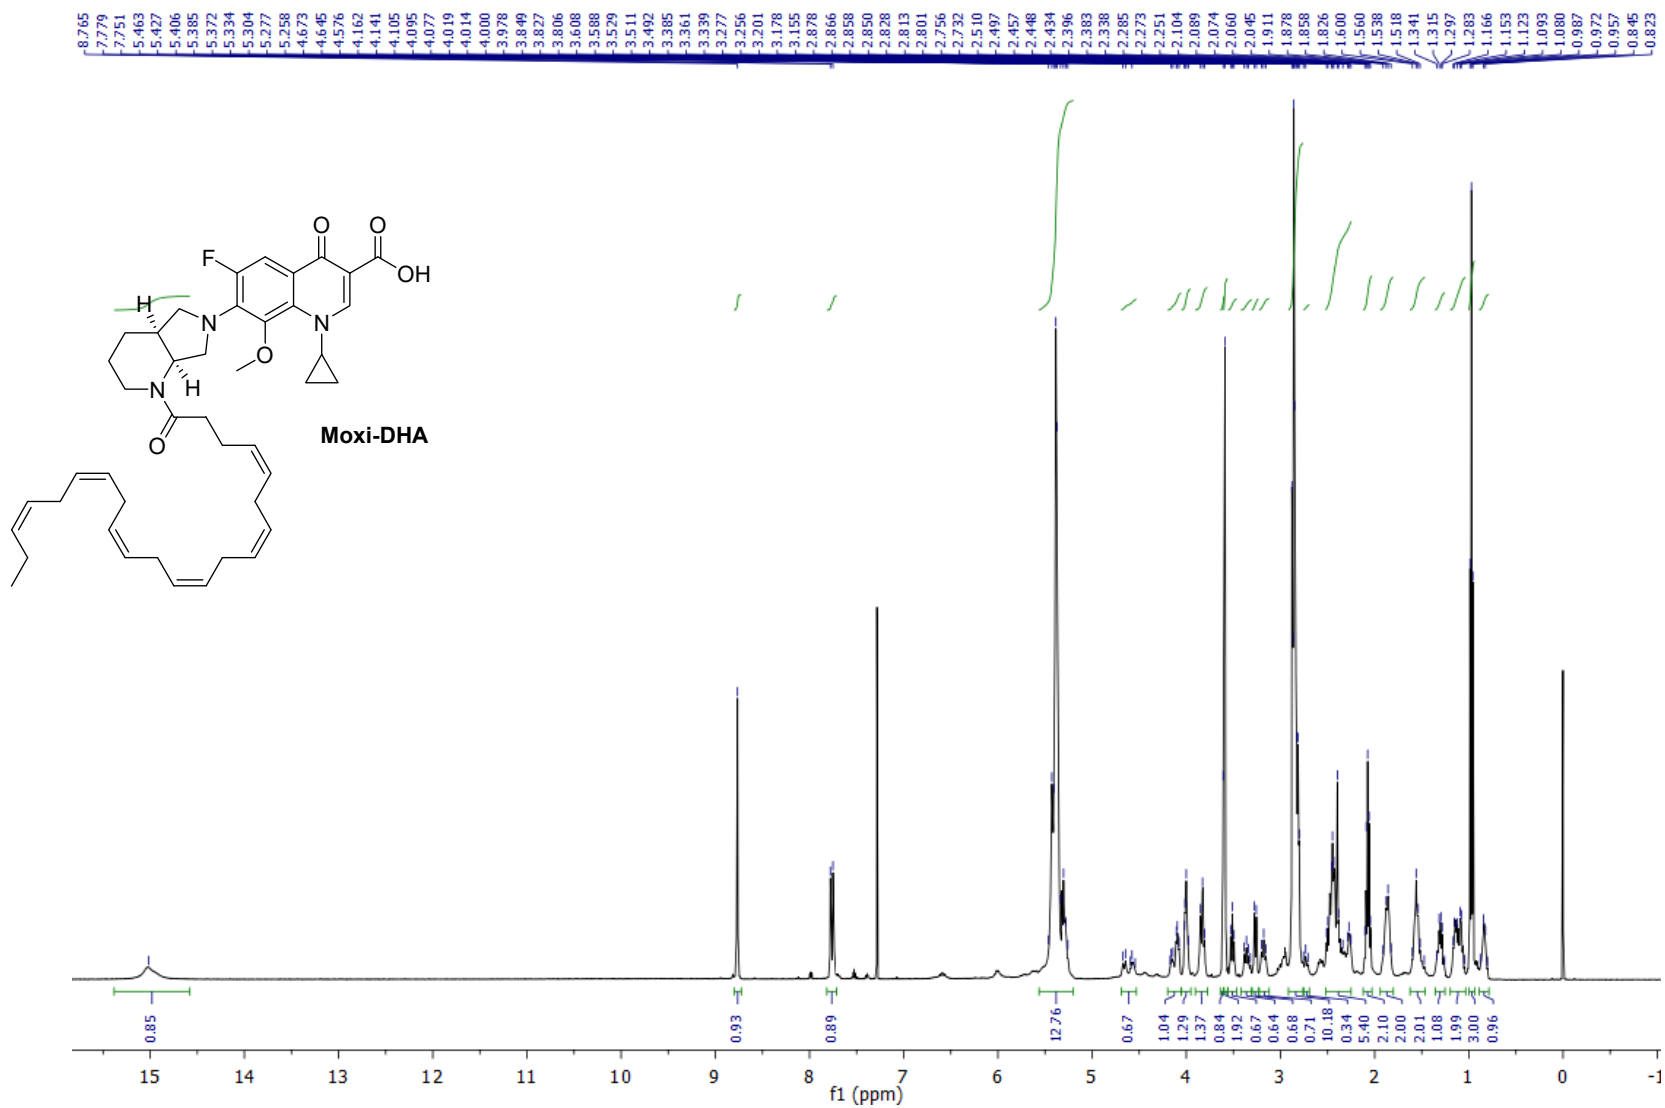



**Table S1.** Evaluation of resistance phenotype of clinical strains used in assays.

|                                 |        | BETA-LACTAMS                  | AMINOGLYCOSIDES                                                        | QUINOLONES                           | MACROLIDES/<br>LINCOSAMIDE<br>S/<br>STREPTOGRAMINS | OXAZOLIDINONE | GLYCOPEPTIDES      | TETRACYCLINES                                                     | RIFAMYCINES | TRIMETHOPRIM/<br>SULFONAMIDES   |
|---------------------------------|--------|-------------------------------|------------------------------------------------------------------------|--------------------------------------|----------------------------------------------------|---------------|--------------------|-------------------------------------------------------------------|-------------|---------------------------------|
| <b>KR<br/>4047<br/>825/19</b>   | M<br>R | MODIFICATION OF<br>PBP (mecA) | RESISTANT KAN TOB GEN<br>(APH(2'')AAC(6''))                            | RESISTANT,<br>PARTIALLY<br>RESISTANT | MLSB<br>CONSTITUTIVE,<br>MLSB+SA<br>CONSTITUTIVE   | WILD          | RESISTANT<br>(TEC) | TARGET MODIFICATION (TET<br>M),PARTIALLY RESISTANT (efflux tet K) | WILD        | TRIMETHOPRIM<br>RESISTANT, WILD |
| <b>KR<br/>4243<br/>829/19</b>   | M<br>R | MODIFICATION OF<br>PBP (mecA) | RESISTANT KAN (APH(3'')-III), WILD<br>RESISTENT KAN TOB (ANT(4')(4'')) | WILD                                 | MLSB<br>INDUCIBLE                                  | WILD          | WILD               | WILD, PARTIALLY RESISTANT (efflux tet K)                          | WILD        | TRIMETHOPRIM<br>RESISTANT, WILD |
| <b>KR<br/>4268<br/>830/19</b>   | M<br>R | MODIFICATION OF<br>PBP (mecA) | RESISTANT KAN TOB GEN<br>(APH(2'')AAC(6''))                            | WILD                                 | MLSB<br>INDUCIBLE                                  | WILD          | WILD               | WILD                                                              | WILD        | TRIMETHOPRIM<br>RESISTANT, WILD |
| <b>KR<br/>4313<br/>834/19</b>   | M<br>R | MODIFICATION OF<br>PBP (mecA) | RESISTANT KAN (APH(3'')-III), WILD<br>RESISTENT KAN TOB (ANT(4')(4'')) | WILD                                 | MLSB<br>CONSTITUTIVE,<br>MLSB+SA<br>CONSTITUTIVE   | WILD          | RESISTANT<br>(TEC) | WILD, PARTIALLY RESISTANT (efflux tet K)                          | WILD        | TRIMETHOPRIM<br>RESISTANT, WILD |
| <b>KR<br/>4358/2<br/>840/19</b> | M<br>R | MODIFICATION OF<br>PBP (mecA) | RESISTANT KAN (APH(3'')-III), WILD<br>RESISTENT KAN TOB (ANT(4')(4'')) | WILD                                 | WILD                                               | WILD          | WILD               | WILD                                                              | WILD        | RESISTANT                       |
| <b>T<br/>5253<br/>845/19</b>    | M<br>R | MODIFICATION OF<br>PBP (mecA) | RESISTANT KAN TOB GEN<br>(APH(2'')AAC(6''))                            | RESISTANT,<br>PARTIALLY<br>RESISTANT | WILD                                               | WILD          | WILD               | WILD, PARTIALLY RESISTANT (efflux tet K)                          | WILD        | RESISTANT                       |
| <b>T<br/>5399<br/>848/19</b>    | M<br>R | MODIFICATION OF<br>PBP (mecA) | RESISTANT KAN (APH(3'')-III), WILD<br>RESISTENT KAN TOB (ANT(4')(4'')) | WILD                                 | WILD                                               | WILD          | WILD               | WILD, PARTIALLY RESISTANT (efflux tet K)                          | WILD        | TRIMETHOPRIM<br>RESISTANT, WILD |
| <b>T<br/>5501<br/>851/19</b>    | M<br>R | MODIFICATION OF<br>PBP (mecA) | RESISTANT KAN TOB GEN<br>(APH(2'')AAC(6''))                            | WILD                                 | MLSB<br>INDUCIBLE                                  | WILD          | WILD               | WILD, PARTIALLY RESISTANT (efflux tet K)                          | WILD        | TRIMETHOPRIM<br>RESISTANT, WILD |
